# Supplementary material for: GSMN-ML- a genome scale metabolic network reconstruction of the obligate human pathogen Mycobacterium leprae
Source: PLoS Negl Trop Dis. 2020 Jul 6;14(7):e0007871. doi: 10.1371/journal.pntd.0007871 (PMC7365477; doi:10.1371/journal.pntd.0007871)
Supplement: S8 File — File shows flux variability analysis and gene essentiality analysis for the model. Two media p-files was set for this test. One is to use glycerol as only carbon source and the other is to use glycerol as only carbon source and the other necessary molecules. Table ‘FVA’ shows results for all reactions with maximized biomass. Table 'media' shows media settings, those substrates whose lower-bound < 0 are allowed to be uptaken. Table 'metabolite_name’ shows metabolite IDs and their names. Table 'KO_gene' shows gene essentiality analysis results on the media set in 'Media'. GRateKO: growth rate when the gene knocked out. Ratio: calculated as GRateKO/GRateWT(wildType). Genes are considered as essential If Ratio < 0.01 (marked red). (XLSX) [file pntd.0007871.s008.xlsx]

## Sheet: GSMN-TB_2 model
R1	GL + ATP = ADP + GL3P + H	0	10	Rv3696c	#	GL + ATP = ADP + GL3P + H
R4	GL3P + MK = DHAP + MKH2	0	10	Rv3302c OR Rv2249c	#	GL3P + MK = DHAP + MKH2
R5	NAD + T3 = DGLYCERATE + NADH	0	10	Rv2858c OR Rv0458	#	NAD + T3 = DGLYCERATE + NADH
R6	ATP + DGLYCERATE = 3PG + ADP	0	10	Rv2205c	#	ATP + DGLYCERATE = 3PG + ADP
R7	ATP + RIB = ADP + R5P	0	10	Rv2436	#	ATP + RIB = ADP + R5P
R8	F1P = DHAP + T3	0	10	Rv0363c	#	F1P = DHAP + T3
R9	FRU = GLC	-10	10		#	FRU = GLC
R10	FRU = MAN	-10	10		#	FRU = MAN
R11	MAN6P = F6P	-10	10	Rv3255c	#	MAN6P = F6P
R12	MAN1P = MAN6P	-10	10	Rv3257c OR Rv3308	#	MAN1P = MAN6P
R13	GTP + MAN1P = GDPMAN + PI	0	10	Rv3264c	#	GTP + MAN1P = GDPMAN + PI
R14	DPP + GDPMAN = GDP + PPM	0	10	Rv2051c	#	DPP + GDPMAN = GDP + PPM
R15	GDPMAN = GDPDHDOMAN	0	10	Rv0112 OR Rv1511	#	GDPMAN = GDPDHDOMAN
R16	GDPDHDOMAN = GDPDHDOGAL	0	10	Rv1512	#	GDPDHDOMAN = GDPDHDOGAL
R17	GDPDHDOGAL + NADPH = GDPFUC + NADP	0	10	Rv1512	#	GDPDHDOGAL + NADPH = GDPFUC + NADP
R18	ATP + GLAC = ADP + GAL1P	0	10	Rv0620	#	ATP + GLAC = ADP + GAL1P
R19	GAL1P + UTP = PPI + UDPGAL	0	10	Rv0619 OR Rv0618	#	GAL1P + UTP = PPI + UDPGAL
R20	UDPG = UDPGAL	-10	10	Rv3634c OR Rv0501 OR Rv0536	#	UDPG = UDPGAL
R21	G1P + UTP = PPI + UDPG	0	10	Rv0993	#	G1P + UTP = PPI + UDPG
R22	bDG6P = IP	-10	10	Rv0046c OR Rv2612c AND Rv1822	#	bDG6P = IP
R23	IP = MI + PI	0	10	Rv2701c	#	IP = MI + PI
R24	MLT = 2.0 GLC	0	10	Rv2471	#	MLT = 2.0 GLC
R25	SUC = FRU + GLC	0	10	Rv2471	#	SUC = FRU + GLC
R26	CELB + h2o = 2 bDGLC	0	10	Rv0186	#	CELB + h2o = 2 bDGLC
R27	G6P + UDPG = TRE6P + UDP	0	10	Rv3490	#	G6P + UDPG = TRE6P + UDP
R28	MLT + PI = bDG1P + bDGLC	0	10	Rv3401	#	MLT + PI = bDG1P + bDGLC
R29	bDG1P = bDG6P	-10	10	Rv3400	#	bDG1P = bDG6P
R30	MLT = TRE	-10	10		#	MLT = TRE
R31	TRE6P = PI + TRE	0	10	Rv3372	#	TRE6P = PI + TRE
R32	FOR + NAD = CO2 + NADH	0	10	Rv2900c	#	FOR + NAD = CO2 + NADH
R33	ATP + GLC = ADP + G6P	0	10	Rv0650	#	ATP + GLC = ADP + G6P
R34	ATP + bDGLC = ADP + bDG6P	0	10	Rv0650	#	ATP + bDGLC = ADP + bDG6P
R35	(n)POLYP + GLC = (n_1)POLYP + G6P	0	10	Rv2702	#	(n)POLYP + GLC = (n_1)POLYP + G6P
R36	(n)POLYP + bDGLC = (n_1)POLYP + bDG6P	0	10	Rv2702	#	(n)POLYP + bDGLC = (n_1)POLYP + bDG6P
R37	G6P = bDG6P	-10	10	Rv0946c	#	G6P = bDG6P
R38	G6P = G1P	-10	10	Rv3068c	#	G6P = G1P
R39	bDG6P = F6P	-10	10	Rv0946c	#	bDG6P = F6P
R40	G6P = F6P	-10	10	Rv0946c	#	G6P = F6P
R41	ATP + F6P = ADP + FDP	0	10	Rv3010c OR Rv2029c	#	ATP + F6P = ADP + FDP
R43	FDP = F6P + PI	0	10	Rv1099c	#	FDP = F6P + PI
R44	FDP = DHAP + G3P	-10	10	Rv0363c	#	FDP = DHAP + G3P
R45	DHAP = G3P	-10	10	Rv1438	#	DHAP = G3P
R46	G3P + NAD + PI = 13PDG + NADH	-10	10	Rv1436	#	G3P + NAD + PI = 13PDG + NADH
R48	13PDG + ADP = 3PG + ATP	-10	10	Rv1437	#	13PDG + ADP = 3PG + ATP
R49	3PG = 2PG	-10	10	Rv3214 OR Rv0489	#	3PG = 2PG
R50	2PG = PEP	-10	10	Rv1023	#	2PG = PEP
R51	PEP + ADP + H = ATP + PYR	0	10	Rv1617	#	PEP + ADP + H = ATP + PYR
R52	LIPO + PYR + 0.001 THI = ADLIPO + CO2	0	10	Rv2241	#	LIPO + PYR + 0.001 THI = ADLIPO + CO2
R53	ADLIPO + COA = ACCOA + DLIPO	-10	10	Rv2215	#	ADLIPO + COA = ACCOA + DLIPO
R54	DLIPO + NAD = LIPO + NADH	-10	10	Rv0462	#	DLIPO + NAD = LIPO + NADH
R55	ACCOA + OA = CIT + COA	0	10	Rv0896 OR Rv0889c OR Rv1131	#	ACCOA + OA = CIT + COA
R56	CIT = CISACONITATE	-10	10	Rv1475c	#	CIT = CISACONITATE
R57	CISACONITATE = ICIT	-10	10	Rv1475c	#	CISACONITATE = ICIT
R58	ICIT + NADP = AKG + CO2 + NADPH	0	10	Rv3339c OR Rv0066c	#	ICIT + NADP = AKG + CO2 + NADPH
R59	AKG + LIPO = SDLIPO + CO2	0	10		#	AKG + LIPO = SDLIPO + CO2
R60	SDLIPO + COA = DLIPO + SUCCOA	0	10		#	SDLIPO + COA = DLIPO + SUCCOA
R61	AKG = SUCCSAL + CO2	0	10	Rv1248c OR Rv0555	#	AKG = SUCCSAL + CO2
R62	FERI + AKG + COA = SUCCOA + FERO + CO2	0	10	Rv2454c AND Rv2455c	#	FERI + AKG + COA = SUCCOA + FERO + CO2
R63	ADP + PI + SUCCOA = ATP + COA + SUCC	-10	10	Rv0952 AND Rv0951	#	ADP + PI + SUCCOA = ATP + COA + SUCC
R64	FUM = MAL	-10	10	Rv1098c	#	FUM = MAL
R65	MAL + NAD = NADH + OA	-10	10	Rv1240	#	MAL + NAD = NADH + OA
R67	AC + ATP + COA = ACCOA + AMP + PPI	0	10	Rv3667	#	AC + ATP + COA = ACCOA + AMP + PPI
R68	ACAL + NAD = AC + NADH	0	10	Rv0458	#	ACAL + NAD = AC + NADH
R69	PYR + ATP + PI = PEP + AMP + PPI	0	10	Rv1127c	#	PYR + ATP + PI = PEP + AMP + PPI
R70	LAC + NAD = NADH + PYR	-10	10	Rv0728c	#	LAC + NAD = NADH + PYR
R71	LLAC + NAD = NADH + PYR	-10	10	Rv1872c OR Rv0694	#	LLAC + NAD = NADH + PYR
R72	MAL + NAD = CO2 + NADH + PYR	-10	10	Rv2332	#	MAL + NAD = CO2 + NADH + PYR
R73	ACAL + NADH = ETH + NAD	-10	10	Rv1862 OR Rv1530 OR Rv0162c OR Rv0761c	#	ACAL + NADH = ETH + NAD
R74	ACAL + NADPH = ETH + NADP	-10	10	Rv3045	#	ACAL + NADPH = ETH + NADP
R75	AC + ATP = ACETYLP + ADP	0	10	Rv0409	#	AC + ATP = ACETYLP + ADP
R76	ACETYLP + COA = ACCOA + PI	-10	10	Rv0408	#	ACETYLP + COA = ACCOA + PI
R77	ACETYLP = AC + PI	0	10	Rv2922A	#	ACETYLP = AC + PI
R78	COA + PROPIONYLP = PI + PROPIONYLCOA	-10	10	Rv0408	#	COA + PROPIONYLP = PI + PROPIONYLCOA
R79	ATP + PROPANOATE = ADP + PROPIONYLP	0	10	Rv0409	#	ATP + PROPANOATE = ADP + PROPIONYLP
R80	SMMALONYLCOA = CO2 + PROPIONYLCOA	0	10	Rv0974c OR Rv3280	#	SMMALONYLCOA = CO2 + PROPIONYLCOA
R81	ATP + COA + PROPANOATE = AMP + PPI + PROPIONYLCOA	0	10	Rv3667	#	ATP + COA + PROPANOATE = AMP + PPI + PROPIONYLCOA
R82	OA + PROPIONYLCOA = 2METHYLCITRATE + COA	0	10	Rv1131	#	OA + PROPIONYLCOA = 2METHYLCITRATE + COA
R83	2METHYLCITRATE = 2METHYLCISACONITATE	0	10	Rv1130	#	2METHYLCITRATE = 2METHYLCISACONITATE
R84	2METHYLCISACONITATE = METHYLISOCITRATE	0	10	Rv1475c	#	2METHYLCISACONITATE = METHYLISOCITRATE
R85	METHYLISOCITRATE = PYR + SUCC	0	10	Rv0467 OR Rv1915 AND Rv1916	#	METHYLISOCITRATE = PYR + SUCC
R86	MK + PROPIONYLCOA = ACRCOA + MKH2	0	10	Rv3140	#	MK + PROPIONYLCOA = ACRCOA + MKH2
R87	0.001 F420 + G6P + NADP = D6PGL + NADPH	0	10	Rv1447c OR Rv1121	#	0.001 F420 + G6P + NADP = D6PGL + NADPH
R88	D6PGL = D6PGC	0	10	Rv1445c	#	D6PGL = D6PGC
R89	D6PGC + NADP = CO2 + NADPH + RL5P	0	10	Rv1122 OR Rv1844c	#	D6PGC + NADP = CO2 + NADPH + RL5P
R90	RL5P = X5P	-10	10	Rv1408	#	RL5P = X5P
R91	RL5P = R5P	-10	10	Rv2465c	#	RL5P = R5P
R92	R1P = R5P	-10	10	Rv3068c	#	R1P = R5P
R93	R5P + 0.001 THI + X5P = G3P + S7P	0	10	Rv1449c	#	R5P + 0.001 THI + X5P = G3P + S7P
R94	G3P + S7P + 0.001 THI = R5P + X5P	0	10	Rv1449c	#	G3P + S7P + 0.001 THI = R5P + X5P
R95	E4P + 0.001 THI + X5P = F6P + G3P	0	10	Rv1449c	#	E4P + 0.001 THI + X5P = F6P + G3P
R96	F6P + G3P + 0.001 THI = E4P + X5P	0	10	Rv1449c	#	F6P + G3P + 0.001 THI = E4P + X5P
R97	G3P + S7P = E4P + F6P	-10	10	Rv1448c	#	G3P + S7P = E4P + F6P
R98	ATP + RIB = ADP + DR5P	0	10	Rv2436	#	ATP + RIB = ADP + DR5P
R99	DR5P = ACAL + G3P	0	10	Rv0478	#	DR5P = ACAL + G3P
R100	BIOTIN_CO2 + PYR = 0.999 BIOTIN + OA	-10	10	Rv2967c	#	BIOTIN_CO2 + PYR = 0.999 BIOTIN + OA
R101	CO2 + GDP + PEP = GTP + OA	-10	10	Rv0211	#	CO2 + GDP + PEP = GTP + OA
R102	ICIT = GLX + SUCC	0	10	Rv0467 OR Rv1915 AND Rv1916	#	ICIT = GLX + SUCC
R103	ACCOA + GLX = COA + MAL	0	10	Rv1837c	#	ACCOA + GLX = COA + MAL
R104	GLAL + NAD = GLYCOLATE + NADH	0	10		#	GLAL + NAD = GLYCOLATE + NADH
R105	GLYCOLATE + O2 = GLX + H2O2	0	10	Rv1257c	#	GLYCOLATE + O2 = GLX + H2O2
R106	METTHF + NADP = METHF + NADPH	-10	10	Rv3356c	#	METTHF + NADP = METHF + NADPH
R107	METHF = FTHF	-10	10	Rv3356c	#	METHF = FTHF
R108	FADH2 + METTHF = FAD + MTHF	0	10		#	FADH2 + METTHF = FAD + MTHF
R109	ATP + SLF = APS + PPI	0	10	Rv1285	#	ATP + SLF = APS + PPI
R110	APS + ATP = ADP + PAPS	0	10	Rv1286	#	APS + ATP = ADP + PAPS
R111	APS + RTHIO = AMP + H2SO3 + OTHIO	0	10	Rv2392	#	APS + RTHIO = AMP + H2SO3 + OTHIO
R112	6.0 FERO + H2SO3 = 6.0 FERI + H2S	-10	10	Rv2391	#	6.0 FERO + H2SO3 = 6.0 FERI + H2S
R113	PAP = AMP + PI	0	10		#	PAP = AMP + PI
R114	MKH2 + NO3 + 0.001 MOLYBDENUM = MK + NO2 + 2 H	0	10	Rv1161 AND Rv1162 AND Rv1164 AND Rv1163 OR Rv1736c	#	MKH2 + NO3 + 0.001 MOLYBDENUM = MK + NO2 + 2 H
R119	MK + NADH = 4.0 H + MKH2 + NAD	0	10	Rv3145 AND Rv3146 AND Rv3147 AND Rv3148 AND Rv3149 AND Rv3150 AND Rv3151 AND Rv3152 AND Rv3153 AND Rv3154 AND Rv3155 AND Rv3156 AND Rv3157 AND Rv3158	#	MK + NADH = 4.0 H + MKH2 + NAD
R120	MK + NADH = MKH2 + NAD	0	10	Rv1854c OR Rv0392c	#	MK + NADH = MKH2 + NAD
R121	MK + NADPH = MKH2 + NADP	0	10	Rv3303c	#	MK + NADPH = MKH2 + NADP
R122	MK + SUCC = FUM + MKH2	-10	10	Rv3318 AND Rv3319 AND Rv3316 AND Rv3317	#	MK + SUCC = FUM + MKH2
R123	FAD + SUCC = FADH2 + FUM	-10	10	Rv3318 AND Rv3319 AND Rv3316 AND Rv3317 OR Rv1552 AND Rv1553 AND Rv1554 AND Rv1555	#	FAD + SUCC = FADH2 + FUM
R124	FE3 + NADPH = FE2 + NADP	-10	10	Rv3106	#	FE3 + NADPH = FE2 + NADP
R125	2.0 HEME_FE3 + MKH2 = 2.0 HEME_FE2 + MK	-10	10	Rv2194 AND Rv2195 AND Rv2196 AND Rv2196 AND Rv1451 AND Rv1456c AND Rv3029c AND Rv3028c AND Rv2200c AND Rv3043c AND Rv2193 AND Rv3043c AND Rv1623c AND Rv1622c OR Rv1623c AND Rv1622c	#	2.0 HEME_FE3 + MKH2 = 2.0 HEME_FE2 + MK
R126	2.0 HEME_FE2 + 0.5 O2 = 6.0 H + 2.0 HEME_FE3	0	10	Rv2194 AND Rv2195 AND Rv2196 AND Rv2196 AND Rv1451 AND Rv1456c AND Rv3029c AND Rv3028c AND Rv2200c AND Rv3043c AND Rv2193 AND Rv3043c AND Rv1623c AND Rv1622c	#	2.0 HEME_FE2 + 0.5 O2 = 6.0 H + 2.0 HEME_FE3
R127	2.0 HEME_FE2 + 0.5 O2 = 2.0 H + 2.0 HEME_FE3	0	10	Rv1623c AND Rv1622c	#	2.0 HEME_FE2 + 0.5 O2 = 2.0 H + 2.0 HEME_FE3
R128	ADP + 4.0 H + PI = ATP	-1000	1000	Rv1308 AND Rv1304 AND Rv1311 AND Rv1310 AND Rv1305 AND Rv1306 AND Rv1309 AND Rv1307	#	ADP + 4.0 H + PI = ATP
R129	ATP = ADP + PI	1	1.0001	Rv1811	#	ATP = ADP + PI
R130	PPI = 2.0 PI	0	10	Rv3628	#	PPI = 2.0 PI
R131	PPI = H + 2.0 PI	0	10	Rv3628	#	PPI = H + 2.0 PI
R132	(n_1)POLYP + ATP = (n)POLYP + ADP	-10	10	Rv2984	#	(n_1)POLYP + ATP = (n)POLYP + ADP
R133	2.0 FERO + NADP = 2.0 FERI + NADPH	-10	10	Rv3106 OR Rv0886	#	2.0 FERO + NADP = 2.0 FERI + NADPH
R134	2.0 H2O2 = O2	0	10	Rv1908c	#	2.0 H2O2 = O2
R135	GLU = CO2 + GABA	0	10	Rv3432c	#	GLU = CO2 + GABA
R136	AKG + GABA = GLU + SUCCSAL	-10	10	Rv2589	#	AKG + GABA = GLU + SUCCSAL
R137	NADP + SUCCSAL = NADPH + SUCC	0	10	Rv0234c OR Rv1731	#	NADP + SUCCSAL = NADPH + SUCC
R138	FAD + PRO = FADH2 + P5C	0	10	Rv1188	#	FAD + PRO = FADH2 + P5C
R139	NAD + P5C = HYDROXYGLU + NADH	0	10	Rv1187	#	NAD + P5C = HYDROXYGLU + NADH
R140	AKG + HYDROXYGLU = GLU + HYDROXYAKG	0	10		#	AKG + HYDROXYGLU = GLU + HYDROXYAKG
R141	HYDROXYAKG = GLX + PYR	-10	10	Rv1223	#	HYDROXYAKG = GLX + PYR
R142	NAD + P5C = GLU + NADH	0	10	Rv1187	#	NAD + P5C = GLU + NADH
R143	ARG = CITR + NH3	0	10	Rv1001	#	ARG = CITR + NH3
R144	AKG + ORN = GLU + GLUGSAL	0	10	Rv2321c OR Rv2322c	#	AKG + ORN = GLU + GLUGSAL
R145	CAP + ORN = CITR + PI	0	10	Rv1656	#	CAP + ORN = CITR + PI
R146	ORN = CO2 + PTRSC	0	10	Rv2531c	#	ORN = CO2 + PTRSC
R147	PTRSC + SAM = 5MTA + SPRMD	0	10	Rv2601	#	PTRSC + SAM = 5MTA + SPRMD
R148	UREA = CO2 + NH3	0	10	Rv1850 AND Rv1849 AND Rv1848 AND Rv1853 AND Rv1851 AND Rv1852	#	UREA = CO2 + NH3
R149	AKG + ILE = GLU + OMVAL	-10	10	Rv2210c	#	AKG + ILE = GLU + OMVAL
R150	LIPO + OXOMETHYLPENTANOATE = 2MBUTLIPO + CO2	0	10	Rv2497c AND Rv2496c	#	LIPO + OXOMETHYLPENTANOATE = 2MBUTLIPO + CO2
R151	2MBUTLIPO + COA = 2MBUTCOA + DLIPO	-10	10	Rv2495c	#	2MBUTLIPO + COA = 2MBUTCOA + DLIPO
R152	2MBUTCOA + MK = 2MBECOA + MKH2	0	10	Rv3140	#	2MBUTCOA + MK = 2MBECOA + MKH2
R153	2MBECOA = HMBUTCOA	0	10	Rv1070c OR Rv0905 OR Rv2486 OR Rv1472	#	2MBECOA = HMBUTCOA
R154	HMBUTCOA + NAD = MAACCOA + NADH	0	10	Rv3774 OR Rv1144	#	HMBUTCOA + NAD = MAACCOA + NADH
R155	COA + MAACCOA = ACCOA + PROPIONYLCOA	-10	10	Rv1074c	#	COA + MAACCOA = ACCOA + PROPIONYLCOA
R156	BIOTIN_CO2 + PROPIONYLCOA = 0.999 BIOTIN + SMMALONYLCOA	0	10	Rv0904c OR Rv2502c OR Rv0974c OR Rv0904c OR Rv3799c OR Rv3280 OR Rv2247	#	BIOTIN_CO2 + PROPIONYLCOA = 0.999 BIOTIN + SMMALONYLCOA
R157	SMMALONYLCOA = RMMALONYLCOA	-10	10		#	SMMALONYLCOA = RMMALONYLCOA
R158	0.001 COB_III + RMMALONYLCOA = SUCCOA	0	10	Rv1492 AND Rv1493	#	0.001 COB_III + RMMALONYLCOA = SUCCOA
R159	0.001 COB_III + SUCCOA = RMMALONYLCOA	0	10	Rv1492 AND Rv1493	#	0.001 COB_III + SUCCOA = RMMALONYLCOA
R160	LIPO + MOP = 3MBUTLIPO + CO2	0	10	Rv2496c AND Rv2497c	#	LIPO + MOP = 3MBUTLIPO + CO2
R161	3MBUTLIPO + COA = 3MBUTCOA + DLIPO	-10	10	Rv2495c	#	3MBUTLIPO + COA = 3MBUTCOA + DLIPO
R162	3MBUTCOA + MK = 3MBECOA + MKH2	0	10	Rv3140	#	3MBUTCOA + MK = 3MBECOA + MKH2
R163	3MBECOA + BIOTIN_CO2 = 0.999 BIOTIN + MGLUTCOA	0	10	Rv0904c OR Rv2502c OR Rv0974c OR Rv0904c OR Rv3799c OR Rv3280 OR Rv2247	#	3MBECOA + BIOTIN_CO2 = 0.999 BIOTIN + MGLUTCOA
R164	MGLUTCOA = HMGLUTCOA	0	10		#	MGLUTCOA = HMGLUTCOA
R165	HMGLUTCOA = ACCOA + ACTAC	0	10		#	HMGLUTCOA = ACCOA + ACTAC
R166	ACTAC + ATP + COA = AACCOA + AMP + PPI	0	10		#	ACTAC + ATP + COA = AACCOA + AMP + PPI
R167	ACTAC + SUCCOA = AACCOA + SUCC	-10	10	Rv2504c AND Rv2503c	#	ACTAC + SUCCOA = AACCOA + SUCC
R168	LIPO + OMVAL = CO2 + IBUTLIPO	0	10	Rv2497c AND Rv2496c	#	LIPO + OMVAL = CO2 + IBUTLIPO
R169	COA + IBUTLIPO = DLIPO + IBUTCOA	-10	10	Rv2495c	#	COA + IBUTLIPO = DLIPO + IBUTCOA
R170	IBUTCOA + MK = MACRCOA + MKH2	0	10	Rv3140	#	IBUTCOA + MK = MACRCOA + MKH2
R171	MACRCOA = HIBUTCOA	0	10	Rv1070c OR Rv0905 OR Rv2486 OR Rv1472	#	MACRCOA = HIBUTCOA
R172	HIBUTCOA = COA + HIBUT	0	10		#	HIBUTCOA = COA + HIBUT
R173	HIBUT + NAD = METHYMALONATE + NADH	0	10	Rv1144 OR Rv0751c	#	HIBUT + NAD = METHYMALONATE + NADH
R174	COA + METHYMALONATE + NAD = CO2 + NADH + PROPIONYLCOA	0	10	Rv0753c	#	COA + METHYMALONATE + NAD = CO2 + NADH + PROPIONYLCOA
R175	ISUCC = NH3 + OA	0	10		#	ISUCC = NH3 + OA
R176	ASP = CO2 + bALA	0	10	Rv3601c	#	ASP = CO2 + bALA
R177	ASN = ASP + NH3	0	10	Rv1538c	#	ASN = ASP + NH3
R178	NAD + THR = 2A3KB + NADH	0	10	Rv2259	#	NAD + THR = 2A3KB + NADH
R179	2A3KB = AMINOACETONE + CO2	0	10		#	2A3KB = AMINOACETONE + CO2
R180	AMINOACETONE + NADH = 1_AMINO_PROPAN_2_OL + NAD	0	10		#	AMINOACETONE + NADH = 1_AMINO_PROPAN_2_OL + NAD
R181	CYS + NH3 + OBUT = LLCT	0	10	Rv1079	#	CYS + NH3 + OBUT = LLCT
R182	LYS = CADA + CO2	0	10	Rv2531c	#	LYS = CADA + CO2
R183	O2 + OBUT + PI = CO2 + PROPIONYLP	0	10		#	O2 + OBUT + PI = CO2 + PROPIONYLP
R184	SAP + THF = DHLIPOYLPROTEIN + METTHF + NH3	0	10	Rv2211c	#	SAP + THF = DHLIPOYLPROTEIN + METTHF + NH3
R185	SER + THF = GLY + METTHF	-10	10	Rv1093 OR Rv0070c	#	SER + THF = GLY + METTHF
R186	GLY + LIPOYLPROTEIN = CO2 + SAP	0	10	Rv1832	#	GLY + LIPOYLPROTEIN = CO2 + SAP
R186b	GLY + NAD = GLX + NH3 + NADH	0	10		#	GLY + NAD = GLX + NH3 + NADH
R187	DHLIPOYLPROTEIN + NAD = LIPOYLPROTEIN + NADH	-10	10	Rv0462 OR Rv3303c	#	DHLIPOYLPROTEIN + NAD = LIPOYLPROTEIN + NADH
R188	SER = NH3 + PYR	0	10	Rv0069c	#	SER = NH3 + PYR
R189	CYS = H2S + NH3 + PYR	0	10	Rv1464	#	CYS = H2S + NH3 + PYR
R190	AKG + TYR = 4HPP + GLU	-10	10	Rv3565 OR Rv0337c	#	AKG + TYR = 4HPP + GLU
R191	4HPP + O2 = CO2 + HOMOGEN	0	10	MT1364	#	4HPP + O2 = CO2 + HOMOGEN
R192	HOMOGEN + O2 = MACAC	0	10		#	HOMOGEN + O2 = MACAC
R193	MACAC = FUACAC	-10	10		#	MACAC = FUACAC
R194	FUACAC = ACTAC + FUM	0	10		#	FUACAC = ACTAC + FUM
R195	AKG + PHE = GLU + PHPYR	-10	10	Rv3565 OR Rv0337c	#	AKG + PHE = GLU + PHPYR
R196	ATP + GLU + NH3 = ADP + GLN + PI	0	10	Rv2220 OR Rv1878 OR Rv2860c	#	ATP + GLU + NH3 = ADP + GLN + PI
R197	AKG + GLN + NADH = 2.0 GLU + NAD	-10	10	Rv3859c AND Rv3858c	#	AKG + GLN + NADH = 2.0 GLU + NAD
R198	AKG + NADH + NH3 = GLU + NAD	-10	10	Rv2476c	#	AKG + NADPH + NH3 = GLU + NADP
R199	ATP + GLU = ADP + GLUP	0	10	Rv2439c	#	ATP + GLU = ADP + GLUP
R200	GLUP + NADPH = GLUGSAL + NADP + PI	0	10	Rv2427c	#	GLUP + NADPH = GLUGSAL + NADP + PI
R201	GLUGSAL = P5C	-10	10		#	GLUGSAL = P5C
R202	NADH + NADPH + 2.0 P5C = NAD + NADP + 2.0 PRO	-10	10	Rv0500	#	NADH + NADPH + 2.0 P5C = NAD + NADP + 2.0 PRO
R203	ACCOA + GLU = COA + NAGLU	-10	10	Rv2747	#	ACCOA + GLU = COA + NAGLU
R204	ATP + NAGLU = ADP + NAGLUP	0	10	Rv1654	#	ATP + NAGLU = ADP + NAGLUP
R205	NADPH + NAGLUP = NADP + NAGLUS + PI	0	10	Rv1652	#	NADPH + NAGLUP = NADP + NAGLUS + PI
R206	GLU + NAGLUS = AKG + NAORN	0	10	Rv1655	#	GLU + NAGLUS = AKG + NAORN
R207	GLU + NAORN = NAGLU + ORN	-10	10	Rv1653	#	GLU + NAORN = NAGLU + ORN
R208	2.0 ATP + CO2 + GLN = 2.0 ADP + CAP + GLU + PI	0	10	Rv1383 AND Rv1384	#	2.0 ATP + CO2 + GLN = 2.0 ADP + CAP + GLU + PI
R209	ASP + ATP + CITR = AMP + ARGSUCC + PPI	0	10	Rv1658	#	ASP + ATP + CITR = AMP + ARGSUCC + PPI
R210	ARGSUCC = ARG + FUM	0	10	Rv1659	#	ARGSUCC = ARG + FUM
R211	2.0 PYR + 0.001 THI = ACLAC + CO2	0	10	Rv3002c AND Rv3003c	#	2.0 PYR + 0.001 THI = ACLAC + CO2
R212	ACLAC + NADPH = DHMVA + NADP	0	10	Rv3001c	#	ACLAC + NADPH = DHMVA + NADP
R213	DHMVA = MOBUT	0	10	Rv0189c	#	DHMVA = MOBUT
R214	GLU + MOBUT = AKG + VAL	-10	10	Rv2210c	#	GLU + MOBUT = AKG + VAL
R215	THR = NH3 + OBUT	0	10	Rv1559	#	THR = NH3 + OBUT
R216	OBUT + PYR = ABUT + CO2	0	10	Rv3509c OR Rv1820 OR Rv3003c OR Rv3470c AND Rv3002c	#	OBUT + PYR = ABUT + CO2
R217	ABUT + NADPH = DIHYDROXYMETHYLPENTANOATE + NADP	0	10	Rv3001c	#	ABUT + NADPH = DIHYDROXYMETHYLPENTANOATE + NADP
R218	DIHYDROXYMETHYLPENTANOATE = OXOMETHYLPENTANOATE	0	10	Rv0189c	#	DIHYDROXYMETHYLPENTANOATE = OXOMETHYLPENTANOATE
R219	GLU + OXOMETHYLPENTANOATE = AKG + ILE	-10	10	Rv2210c	#	GLU + OXOMETHYLPENTANOATE = AKG + ILE
R220	ACCOA + MOBUT = COA + IPPMAL	0	10	Rv3710	#	ACCOA + MOBUT = COA + IPPMAL
R221	IPPMAL = CBHCAP	-10	10	Rv2988c AND Rv2987c	#	IPPMAL = CBHCAP
R222	CBHCAP + NAD = NADH + OICAP	0	10	Rv2995c	#	CBHCAP + NAD = NADH + OICAP
R223	OICAP = CO2 + MOP	0	10		#	OICAP = CO2 + MOP
R224	GLU + MOP = AKG + LEU	-10	10	Rv2210c	#	GLU + MOP = AKG + LEU
R225	GLU + OA = AKG + ASP	-10	10	Rv3565 OR Rv0337c	#	GLU + OA = AKG + ASP
R226	ASP + ATP + GLN = AMP + ASN + GLU + PPI	0	10	Rv2201	#	ASP + ATP + GLN = AMP + ASN + GLU + PPI
R227	ASP + ATP = ADP + ASP4P	0	10	Rv3709c	#	ASP + ATP = ADP + ASP4P
R228	ASP4P + NADPH = ASPSA + NADP + PI	0	10	Rv3708c	#	ASP4P + NADPH = ASPSA + NADP + PI
R229	ASPSA + NADPH = HSER + NADP	0	10	Rv1294	#	ASPSA + NADPH = HSER + NADP
R230	ATP + HSER = ADP + PHSER	0	10	Rv1296	#	ATP + HSER = ADP + PHSER
R231	PHSER = PI + THR	0	10	Rv1295	#	PHSER = PI + THR
R232	ASPSA + PYR = DIHYDRODIPICOLINATE	0	10	Rv2753c	#	ASPSA + PYR = DIHYDRODIPICOLINATE
R233	2.0 DIHYDRODIPICOLINATE + NADH + NADPH = NAD + NADP + 2.0 TETRAHYDRODIPICOLINATE	0	10	Rv2773c	#	2.0 DIHYDRODIPICOLINATE + NADH + NADPH = NAD + NADP + 2.0 TETRAHYDRODIPICOLINATE
R234	SUCCOA + TETRAHYDRODIPICOLINATE = COA + SAOPIM	0	10	Rv1201c	#	SUCCOA + TETRAHYDRODIPICOLINATE = COA + SAOPIM
R235	GLU + SAOPIM = AKG + SDAPIM	-10	10	Rv1655 OR Rv0858c	#	GLU + SAOPIM = AKG + SDAPIM
R236	SDAPIM = DAPIM + SUCC	0	10	Rv1202	#	SDAPIM = DAPIM + SUCC
R237	DAPIM = MDAPIM	-10	10	Rv2726c	#	DAPIM = MDAPIM
R238	MDAPIM = CO2 + LYS	0	10	Rv1293	#	MDAPIM = CO2 + LYS
R239	HSER + SUCCOA = COA + OSLHSER	-10	10		#	HSER + SUCCOA = COA + OSLHSER
R240	CYS + OSLHSER = LLCT + SUCC	0	10	Rv1079	#	CYS + OSLHSER = LLCT + SUCC
R241	LLCT = HCYS + NH3 + PYR	0	10	MT3443	#	LLCT = HCYS + NH3 + PYR
R242	HCYS + SAM = MET + SAH	0	10	Rv2458	#	HCYS + SAM = MET + SAH
R243	0.002 COB_I + HCYS + MTHF = 0.001 COB_II + MET + THF	0	10	Rv2124c	#	0.002 COB_I + HCYS + MTHF = 0.001 COB_II + MET + THF
R244	0.002 COB_I + MET + THF = 0.001 COB_II + HCYS + MTHF	0	10	Rv2124c	#	0.002 COB_I + MET + THF = 0.001 COB_II + HCYS + MTHF
R245	HCYS + MTHF = MET + THF	-10	10	Rv1133c	#	HCYS + MTHF = MET + THF
R246	PYR + NADH + NH3 = ALA + NAD	-10	10	Rv2780	#	PYR + NADH + NH3 = ALA + NAD
R247	3PG + NAD = NADH + PHP	0	10	Rv2996c	#	3PG + NAD = NADH + PHP
R248	GLU + PHP = 3PSER + AKG	-10	10	Rv0884c	#	GLU + PHP = 3PSER + AKG
R249	3PSER = PI + SER	0	10	Rv3042c	#	3PSER = PI + SER
R250	ACCOA + SER = ASER + COA	-10	10	Rv2335	#	ACCOA + SER = ASER + COA
R251	ASER + H2S = AC + CYS	0	10	Rv2334 OR Rv1336	#	ASER + H2S = AC + CYS
R252	ACCOA + HSER = COA + OAHSER	-10	10	Rv3341	#	ACCOA + HSER = COA + OAHSER
R253	CYS + OAHSER = AC + LLCT	0	10	Rv1079	#	CYS + OAHSER = AC + LLCT
R254	H2S + OAHSER = AC + HCYS	0	10	Rv1079	#	H2S + OAHSER = AC + HCYS
R255	H2S + OSLHSER = HCYS + SUCC	0	10	Rv1079	#	H2S + OSLHSER = HCYS + SUCC
R256	OSLHSER = NH3 + OBUT + SUCC	0	10	Rv1079	#	OSLHSER = NH3 + OBUT + SUCC
R257	HCYS + SER = LLCT	0	10	Rv1077	#	HCYS + SER = LLCT
R258	LLCT = CYS + NH3 + OBUT	0	10	Rv1079	#	LLCT = CYS + NH3 + OBUT
R259	ATP + MET = PI + PPI + SAM	0	10	Rv1392	#	ATP + MET = PI + PPI + SAM
R260	SAH = ADN + HCYS	0	10	Rv3248c	#	SAH = ADN + HCYS
R261	ATP + PRPP = PPI + PRBATP	0	10	Rv2121c	#	ATP + PRPP = PPI + PRBATP
R262	PRBATP = PPI + PRBAMP	0	10	Rv2122c	#	PRBATP = PPI + PRBAMP
R263	PRBAMP = PRFP	0	10	Rv1606	#	PRBAMP = PRFP
R264	PRFP = PRLP	0	10	Rv1603	#	PRFP = PRLP
R265	GLN + PRLP = AICAR + DIMGP + GLU	0	10	Rv1602	#	GLN + PRLP = AICAR + DIMGP + GLU
R266	DIMGP = IMACP	0	10	Rv1601	#	DIMGP = IMACP
R267	GLU + IMACP = AKG + HISOLP	-10	10	Rv3772 OR Rv1600	#	GLU + IMACP = AKG + HISOLP
R268	HISOLP = HISOL + PI	0	10	Rv1601	#	HISOLP = HISOL + PI
R269	HISOL + 2.0 NAD = HIS + 2.0 NADH	0	10	Rv1599	#	HISOL + 2.0 NAD = HIS + 2.0 NADH
R270	E4P + PEP = 3DDAH7P + PI	0	10	Rv2178c	#	E4P + PEP = 3DDAH7P + PI
R271	3DDAH7P = DQT + PI	0	10	Rv2538c	#	3DDAH7P = DQT + PI
R272	DQT = DHSK	0	10	Rv2537c	#	DQT = DHSK
R273	DHSK + NADPH = NADP + SME	0	10	Rv2552c	#	DHSK + NADPH = NADP + SME
R274	ATP + SME = ADP + SME3P	0	10	Rv2539c	#	ATP + SME = ADP + SME3P
R275	PEP + SME3P = 3PSME + PI	0	10	Rv3227	#	PEP + SME3P = 3PSME + PI
R276	3PSME = CHOR + PI	0	10	Rv2540c	#	3PSME = CHOR + PI
R277	CHOR + GLN = AN + GLU + PYR	0	10	Rv1609	#	CHOR + GLN = AN + GLU + PYR
R278	AN + PRPP = NPRAN + PPI	0	10	Rv2192c	#	AN + PRPP = NPRAN + PPI
R279	NPRAN = CPAD5P	0	10	Rv1603	#	NPRAN = CPAD5P
R280	CPAD5P = CO2 + IGP	0	10	Rv1611	#	CPAD5P = CO2 + IGP
R281	IGP + SER = G3P + TRP	0	10	Rv1613 AND Rv1612	#	IGP + SER = G3P + TRP
R282	CHOR = PHEN	-10	10	Rv1885c OR Rv0948c	#	CHOR = PHEN
R283	PHEN = CO2 + PHPYR	0	10	Rv3838c	#	PHEN = CO2 + PHPYR
R284	GLU + PHPYR = AKG + PHE	-10	10	Rv3565 OR Rv0337c	#	GLU + PHPYR = AKG + PHE
R285	NAD + PHEN = 4HPP + CO2 + NADH	0	10	Rv3754	#	NAD + PHEN = 4HPP + CO2 + NADH
R286	4HPP + GLU = AKG + TYR	-10	10	Rv3565 OR Rv0337c	#	4HPP + GLU = AKG + TYR
R287	ATP + R5P = AMP + PRPP	-10	10	Rv1017c	#	ATP + R5P = AMP + PRPP
R288	ASP + CAP = CAASP + PI	0	10	Rv1380	#	ASP + CAP = CAASP + PI
R289	CAASP = DOROA	-10	10	Rv1381	#	CAASP = DOROA
R290	DOROA + O2 = H2O2 + OROA	0	10	Rv2139	#	DOROA + O2 = H2O2 + OROA
R291	OROA + PRPP = OMP + PPI	0	10	Rv0382c	#	OROA + PRPP = OMP + PPI
R292	OMP = CO2 + UMP	0	10	Rv1385	#	OMP = CO2 + UMP
R293	ATP + UMP = ADP + UDP	-10	10	Rv1712	#	ATP + UMP = ADP + UDP
R294	ATP + UDP = ADP + UTP	-10	10	Rv2445c	#	ATP + UDP = ADP + UTP
R295	ATP + GLN + UTP = ADP + CTP + GLU + PI	0	10	Rv1699	#	ATP + GLN + UTP = ADP + CTP + GLU + PI
R296	ATP + NH3 + UTP = ADP + CTP + PI	0	10	Rv1699	#	ATP + NH3 + UTP = ADP + CTP + PI
R297	CDP + O2 + RTHIO = DCDP + OTHIO	0	10	Rv3051c AND Rv3048c	#	CDP + O2 + RTHIO = DCDP + OTHIO
R298	CDP + RTHIO + COB_II = OTHIO + DCDP + COB_III	0	10	Rv0570	#	CDP + RTHIO + COB_II = OTHIO + DCDP + COB_III
R299	ATP + DCDP = ADP + DCTP	0	10	Rv2445c	#	ATP + DCDP = ADP + DCTP
R300	DCTP = DUTP + NH3	0	10	Rv0321	#	DCTP = DUTP + NH3
R301	DUTP = DUMP + PPI	0	10	Rv2697c	#	DUTP = DUMP + PPI
R302	DUMP + FADH2 + METTHF = DTMP + FAD + THF	-10	10	Rv2754c	#	DUMP + FADH2 + METTHF = DTMP + FAD + THF
R303	DUMP + METTHF = DHF + DTMP	-10	10	Rv2764c	#	DUMP + METTHF = DHF + DTMP
R304	ATP + DTMP = ADP + DTDP	-10	10	Rv3247c	#	ATP + DTMP = ADP + DTDP
R305	ATP + DTDP = ADP + DTTP	-10	10	Rv2445c	#	ATP + DTDP = ADP + DTTP
R306	ATP + CDP = ADP + CTP	-10	10	Rv2445c	#	ATP + CDP = ADP + CTP
R307	ATP + CMP = ADP + CDP	-10	10	Rv1712	#	ATP + CMP = ADP + CDP
R308	DCTP = DCMP + PPI	0	10		#	DCTP = DCMP + PPI
R309	ATP + DCMP = ADP + DCDP	-10	10	Rv1712	#	ATP + DCMP = ADP + DCDP
R310	NADPH + OTHIO = NAD + RTHIO	0	10	Rv3913	#	NADPH + OTHIO = NAD + RTHIO
R311	PPI + UMP = PRPP + URA	0	10	Rv3309c	#	PPI + UMP = PRPP + URA
R312	PRPP + URA = PPI + UMP	0	10	Rv3309c	#	PRPP + URA = PPI + UMP
R313	GLN + PRPP = GLU + PPI + PRAM	0	10	Rv0808	#	GLN + PRPP = GLU + PPI + PRAM
R314	ATP + GLY + PRAM = ADP + GAR + PI	0	10	Rv0772	#	ATP + GLY + PRAM = ADP + GAR + PI
R315	FTHF + GAR = FGAR + THF	0	10	Rv0956	#	FTHF + GAR = FGAR + THF
R316	ATP + FGAR + GLN = ADP + FGAM + GLU + PI	0	10	Rv0803	#	ATP + FGAR + GLN = ADP + FGAM + GLU + PI
R317	ATP + FGAM = ADP + AIR + PI	0	10	Rv0809	#	ATP + FGAM = ADP + AIR + PI
R318	AIR + ATP + HCO3 = ADP + CAIR + PI	0	10	Rv3276c	#	AIR + ATP + HCO3 = ADP + CAIR + PI
R319	ASP + ATP + CAIR = ADP + PI + SAICAR	0	10	Rv0780	#	ASP + ATP + CAIR = ADP + PI + SAICAR
R320	SAICAR = AICAR + FUM	-10	10	Rv0777	#	SAICAR = AICAR + FUM
R321	AICAR + FTHF = PRFICA + THF	-10	10	Rv0957	#	AICAR + FTHF = PRFICA + THF
R322	PRFICA = IMP	-10	10	Rv0957	#	PRFICA = IMP
R323	ATP = PPI + cAMP	0	10	Rv1625c	#	ATP = PPI + cAMP
R324	GTP = PPI + cGMP	0	10	Rv2435c	#	GTP = PPI + cGMP
R325	cAMP = AMP	0	10		#	cAMP = AMP
R326	cGMP = GMP	0	10		#	cGMP = GMP
R327	ATP + DGMP = ADP + DGDP	-10	10	Rv1389	#	ATP + DGMP = ADP + DGDP
R328	DATP + GMP = DADP + GDP	-10	10	Rv1389	#	DATP + GMP = DADP + GDP
R329	ATP + DUDP = ADP + DUTP	-10	10	Rv2445c	#	ATP + DUDP = ADP + DUTP
R330	O2 + RTHIO + UDP = DUDP + OTHIO	0	10	Rv3051c AND Rv3048c	#	O2 + RTHIO + UDP = DUDP + OTHIO
R331	5MTA + PI = AD + MTR1P	0	10	Rv0535	#	5MTA + PI = AD + MTR1P
R332	5MTA + PI = AD + MTR1P	0	10	Rv0535	#	5MTA + PI = AD + MTR1P
R333	AD + PRPP = AMP + PPI	0	10	Rv2584c	#	AD + PRPP = AMP + PPI
R334	GN + PRPP = GMP + PPI	0	10	Rv3624c	#	GN + PRPP = GMP + PPI
R335	HYXN + PRPP = IMP + PPI	0	10	Rv3624c	#	HYXN + PRPP = IMP + PPI
R336	PRPP + XAN = PPI + XMP	0	10		#	PRPP + XAN = PPI + XMP
R337	DIN + PI = DR1P + HYXN	-10	10	Rv3307	#	DIN + PI = DR1P + HYXN
R338	DA + PI = AD + DR1P	-10	10	Rv3307	#	DA + PI = AD + DR1P
R338b	DR1P = R5P	-10	10	Rv3068c	#	DR1P = R5P
R339	HYXN + R1P = INS + PI	-10	10	Rv3307	#	HYXN + R1P = INS + PI
R340	AD + R1P = ADN + PI	-10	10	Rv3307	#	AD + R1P = ADN + PI
R341	GN + R1P = GSN + PI	-10	10	Rv3307	#	GN + R1P = GSN + PI
R342	R1P + XAN = PI + XTSINE	-10	10	Rv3307	#	R1P + XAN = PI + XTSINE
R343	XTSINE = RIB + XAN	0	10		#	XTSINE = RIB + XAN
R344	ADN = INS + NH3	0	10	Rv3313c	#	ADN = INS + NH3
R345	DA = DIN + NH3	0	10	Rv3313c	#	DA = DIN + NH3
R346	DGTP = DGMP + PPI	0	10		#	DGTP = DGMP + PPI
R347	ATP + GTP = AMP + ppGpp	0	10	Rv2583c	#	ATP + GTP = AMP + ppGpp
R348	ppGpp = GDP + PPI	0	10	Rv2583c	#	ppGpp = GDP + PPI
R349	ASP + GTP + IMP = ASUC + GDP + PI	0	10	Rv0357c	#	ASP + GTP + IMP = ASUC + GDP + PI
R350	ASUC = AMP + FUM	-10	10	RV0777	#	ASUC = AMP + FUM
R351	AMP + ATP = 2.0 ADP	-10	10	Rv0733	#	AMP + ATP = 2.0 ADP
R351b	ADN + ATP = ADP + AMP	-10	10	Rv2202c	#	ADN + ATP = ADP + AMP
R352	ADP + O2 + RTHIO = DADP + OTHIO	0	10	Rv3051c AND Rv3048c	#	ADP + O2 + RTHIO = DADP + OTHIO
R353	ADP + RTHIO + COB_II = OTHIO + DADP + COB_III	0	10	Rv0570	#	ADP + RTHIO + COB_II = OTHIO + DADP + COB_III
R354	ATP + DADP = ADP + DATP	-10	10	Rv2445c	#	ATP + DADP = ADP + DATP
R355	IMP + NAD = NADH + XMP	0	10	Rv3411c AND Rv3410c AND Rv1843c	#	IMP + NAD = NADH + XMP
R356	ATP + GLN + XMP = AMP + GLU + GMP + PPI	0	10	Rv3396c	#	ATP + GLN + XMP = AMP + GLU + GMP + PPI
R357	ATP + GMP = ADP + GDP	-10	10	Rv1389	#	ATP + GMP = ADP + GDP
R358	ATP + GDP = ADP + GTP	-10	10	Rv2445c	#	ATP + GDP = ADP + GTP
R359	GDP + O2 + RTHIO = DGDP + OTHIO	0	10	Rv3051c AND Rv3048c	#	GDP + O2 + RTHIO = DGDP + OTHIO
R361	ATP + DGDP = ADP + DGTP	-10	10	Rv2445c	#	ATP + DGDP = ADP + DGTP
R362	ASP + FUM = ISUCC + SUCC	0	10	Rv1595	#	ASP + FUM = ISUCC + SUCC
R363	ASP + O2 = H2O2 + ISUCC	0	10	Rv1595	#	ASP + O2 = H2O2 + ISUCC
R364	DHAP + ISUCC = PI + QA	0	10	Rv1594	#	DHAP + ISUCC = PI + QA
R365	PRPP + QA = CO2 + NACN + PPI	0	10	Rv1596	#	PRPP + QA = CO2 + NACN + PPI
R366	NAM + h2o = NAC + NH3	-10	10	Rv2043c	#	NAM + h2o = NAC + NH3
R367	NAC + PRPP = NACN + PPI	0	10	Rv0573c	#	NAC + PRPP = NACN + PPI
R368	ATP + NACN = NAAD + PPI	0	10	Rv2421c	#	ATP + NACN = NAAD + PPI
R369	ATP + NAAD + NH3 = AMP + NAD + PPI	0	10	Rv2438c	#	ATP + NAAD + NH3 = AMP + NAD + PPI
R370	ATP + GLN + NAAD = AMP + GLU + NAD + PPI	0	10	Rv2438c	#	ATP + GLN + NAAD = AMP + GLU + NAD + PPI
R371	NAC + R1P = NACD + PI	0	10	Rv3307	#	NAC + R1P = NACD + PI
R372	NAM + R1P = NAMD + PI	0	10	Rv3307	#	NAM + R1P = NAMD + PI
R373	ATP + NACD = ADP + NACN	0	10	Rv0410c	#	ATP + NACD = ADP + NACN
R374	ATP + NAMD = ADP + NAMN	0	10		#	ATP + NAMD = ADP + NAMN
R375	ATP + NAMN = NAD + PPI	0	10	Rv2421c	#	ATP + NAMN = NAD + PPI
R376	NAD + NADPH = NADH + NADP	-10	10	Rv0155 AND Rv0157 AND Rv0156	#	NAD + NADPH = NADH + NADP
R377	ATP + NAD = ADP + NADP	0	10	Rv1695	#	ATP + NAD = ADP + NADP
R378	NADP = NAD + PI	0	10		#	NADP = NAD + PI
R379	NAD + NADPH = NADH + NADP	0	10	Rv2713 OR Rv3303c	#	NAD + NADPH = NADH + NADP
R380	NAD = AMP + NAMN	0	10	Rv3199c	#	NAD = AMP + NAMN
R381	GTP = D6RP5P + FOR + PPI	0	10	Rv1415 OR Rv1940	#	GTP = D6RP5P + FOR + PPI
R382	D6RP5P = A6RP5P + NH3	0	10	Rv2671 OR Rv1409	#	D6RP5P = A6RP5P + NH3
R383	A6RP5P + NADPH = A6RP5P2 + NADP	0	10	Rv2671 OR Rv1409	#	A6RP5P + NADPH = A6RP5P2 + NADP
R384	A6RP5P2 = A6RP + PI	0	10		#	A6RP5P2 = A6RP + PI
R385	RL5P = DB4P + FOR	0	10	Rv1940	#	RL5P = DB4P + FOR
R386	A6RP + DB4P = D8RL + PI	0	10	Rv1416	#	A6RP + DB4P = D8RL + PI
R387	2.0 D8RL = A6RP + RIBFLAV	0	10	Rv1412	#	2.0 D8RL = A6RP + RIBFLAV
R388	ATP + RIBFLAV = ADP + FMN	0	10	Rv2786c	#	ATP + RIBFLAV = ADP + FMN
R388b	FMN + H = FMNH2	0	10		#	FMN + NADH + H = FMNH2 + NADH
R388c	FMNH2 + NADH + H + O2 = DMB + E4P + NAD	0	10	Rv0306	#	FMNH2 + NADH + H + O2 = DMB + E4P + NAD
R388d	DMB + NACN = ARP	0	10	Rv2207	#	DMB + NACN = ARP
R389	ATP + FMN = FAD + PPI	0	10	Rv2786c	#	ATP + FMN = FAD + PPI
R390	METTHF + MOBUT = AKP + THF	0	10	Rv2225	#	METTHF + MOBUT = AKP + THF
R391	AKP + NADPH = NADP + PANT	0	10	Rv2573	#	AKP + NADPH = NADP + PANT
R392	ATP + PANT + bALA = AMP + PNTO + PPI	0	10	Rv3602c	#	ATP + PANT + bALA = AMP + PNTO + PPI
R393	ATP + PNTO = 4PPNTO + ADP	0	10	Rv1092c	#	ATP + PNTO = 4PPNTO + ADP
R394	4PPNTO + CTP + CYS = 4PPNCYS + CMP + PPI	0	10	Rv1391	#	4PPNTO + CTP + CYS = 4PPNCYS + CMP + PPI
R395	4PPNCYS = 4PPNTE + CO2	0	10	Rv1391	#	4PPNCYS = 4PPNTE + CO2
R396	4PPNTE + ATP = DPCOA + PPI	0	10	Rv2965c	#	4PPNTE + ATP = DPCOA + PPI
R397	ATP + DPCOA = ADP + COA	0	10	Rv1631	#	ATP + DPCOA = ADP + COA
R398	COA = ACP	0	10	Rv2523c OR Rv2794c	#	COA = ACP
R399	GTP = AHTD + FOR	0	10	Rv3609c	#	GTP = AHTD + FOR
R400	AHTD = DHP + 3.0 PI	0	10	Rv0757 AND Rv0758	#	AHTD = DHP + 3.0 PI
R401	DHP = AHHMP + GLAL	0	10	Rv3607c	#	DHP = AHHMP + GLAL
R402	AHHMP + ATP = AHHMD + AMP	0	10	Rv3606c	#	AHHMP + ATP = AHHMD + AMP
R403	CHOR + GLN = ADCHOR + GLU	0	10	Rv0013	#	CHOR + GLN = ADCHOR + GLU
R404	ADCHOR = PABA + PYR	0	10	Rv0812	#	ADCHOR = PABA + PYR
R405	AHHMD + PABA = DHPT + PPI	0	10	Rv3608c OR Rv1207	#	AHHMD + PABA = DHPT + PPI
R406	AHHMP + PABA = DHPT	0	10	Rv3608c OR Rv1207	#	AHHMP + PABA = DHPT
R407	ATP + DHPT + GLU = ADP + DHF + PI	0	10	Rv2447c	#	ATP + DHPT + GLU = ADP + DHF + PI
R408	DHF + NADPH = NADP + THF	0	10	Rv2763c	#	DHF + NADPH = NADP + THF
R409	ATP + GLU + THF = ADP + PI + THFG	0	10	Rv2447c	#	ATP + GLU + THF = ADP + PI + THFG
R410	THFG = GLU + THF	0	10		#	THFG = GLU + THF
R411	CYS + FE2 = ALA + FERO	0	10	Rv3025c OR Rv1464	#	CYS + FE2 = ALA + FERO
R412	CHOR = ICHOR	-10	10	Rv3215 OR Rv2386c	#	CHOR = ICHOR
R413	AKG + ICHOR = CO2 + PYR + SHCHC	0	10	Rv0555	#	AKG + ICHOR = CO2 + PYR + SHCHC
R414	SHCHC = OSB	0	10		#	SHCHC = OSB
R415	ATP + COA + OSB = AMP + OSBCOA + PPI	0	10	Rv0542c AND Rv0553	#	ATP + COA + OSB = AMP + OSBCOA + PPI
R416	OSBCOA = COA + DHN	0	10	Rv0548c	#	OSBCOA = COA + DHN
R417	DHN + NPP = CO2 + DMK + PPI	0	10	Rv0534c	#	DHN + NPP = CO2 + DMK + PPI
R418	DMK + SAM = MKH2 + SAH	0	10		#	DMK + SAM = MKH2 + SAH
R419	4.0 ACCOA = 3.0 COA + PIMELOYL_COA	0	10		#	4.0 ACCOA = 3.0 COA + PIMELOYL_COA
R420	ALA + PIMELOYL_COA = 8_AMINO7_OXONONANOATE + CO2 + COA	0	10	Rv1569 AND Rv0032	#	ALA + PIMELOYL_COA = 8_AMINO7_OXONONANOATE + CO2 + COA
R421	8_AMINO7_OXONONANOATE + SAM = 7_8_DIAMINONONANOATE + SAM_2_OXOBUTANOATE	0	10	Rv1568	#	8_AMINO7_OXONONANOATE + SAM = 7_8_DIAMINONONANOATE + SAM_2_OXOBUTANOATE
R422	SAM_2_OXOBUTANOATE = SAM	0	10		#	SAM_2_OXOBUTANOATE = SAM
R423	7_8_DIAMINONONANOATE + ATP + CO2 = ADP + DETHIOBIOTIN	0	10	Rv1570	#	7_8_DIAMINONONANOATE + ATP + CO2 = ADP + DETHIOBIOTIN
R424	DETHIOBIOTIN + H2S + SAM = BIOTIN + DA	0	10	Rv1589	#	DETHIOBIOTIN + H2S + SAM = BIOTIN + DA
R425	CO2 = HCO3	0	10	Rv3588c OR Rv1284	#	CO2 = HCO3
R426	ATP + BIOTIN = AMP + BIOTIN_BCCP + PPI	0	10	Rv3279c	#	ATP + BIOTIN = AMP + BIOTIN_BCCP + PPI
R427	ATP + BIOTIN_BCCP + HCO3 = ADP + BIOTIN_CO2 + PI	0	10	Rv2501c OR Rv0973c OR Rv3285	#	ATP + BIOTIN_BCCP + HCO3 = ADP + BIOTIN_CO2 + PI
R427b	OCTANOYL_ACP = ACP + APO_LIPO	0	10	Rv2217	#	OCTANOYL_ACP = ACP + APO_LIPO
R427c	APO_LIPO + 2.0 H2S + 2.0 SAM = 2.0 DA + LIPO + 2.0 MET	0	10	Rv2218	#	APO_LIPO + 2.0 H2S + 2.0 SAM = 2.0 DA + LIPO + 2.0 MET
R428	ATP + GLU = AMP + PPI + TRNA_GLU	0	10	Rv2992c	#	ATP + GLU = AMP + PPI + TRNA_GLU
R429	NADPH + TRNA_GLU = GLU1SEMIALD + NADP	0	10	Rv0509	#	NADPH + TRNA_GLU = GLU1SEMIALD + NADP
R430	GLU1SEMIALD = 5_AMINO_LEVULINATE	0	10	Rv0524	#	GLU1SEMIALD = 5_AMINO_LEVULINATE
R431	2.0 5_AMINO_LEVULINATE = PORPHOBILILOGIN	0	10	Rv0512	#	2.0 5_AMINO_LEVULINATE = PORPHOBILILOGIN
R432	4.0 PORPHOBILILOGIN = HYDROXYMETHYLBILANE + 4.0 NH3	0	10	Rv0510	#	4.0 PORPHOBILILOGIN = HYDROXYMETHYLBILANE + 4.0 NH3
R433	HYDROXYMETHYLBILANE = UROPORPHYRINOGEN_III	0	10	Rv0511	#	HYDROXYMETHYLBILANE = UROPORPHYRINOGEN_III
R434	UROPORPHYRINOGEN_III = 4.0 CO2 + COPROPORPHYRINOGEN_III	0	10	Rv2678c	#	UROPORPHYRINOGEN_III = 4.0 CO2 + COPROPORPHYRINOGEN_III
R435	COPROPORPHYRINOGEN_III + 2.0 O2 = 2.0 CO2 + 2.0 H2O2 + PROTOPORPHYRINOGEN	0	10		#	COPROPORPHYRINOGEN_III + 2.0 O2 = 2.0 CO2 + 2.0 H2O2 + PROTOPORPHYRINOGEN
R436	COPROPORPHYRINOGEN_III + 2.0 SAM = 2.0 CO2 + 2.0 MET + PROTOPORPHYRINOGEN	0	10	Rv2388C	#	COPROPORPHYRINOGEN_III + 2.0 SAM = 2.0 CO2 + 2.0 MET + PROTOPORPHYRINOGEN
R437	1.5 O2 + PROTOPORPHYRINOGEN = PROTOPORPHYRIN_IX	0	10	Rv2677 OR Rv1300	#	1.5 O2 + PROTOPORPHYRINOGEN = PROTOPORPHYRIN_IX
R438	FE2 + PROTOPORPHYRIN_IX = PROTOHEME_FE2	0	10	Rv1485	#	FE2 + PROTOPORPHYRIN_IX = PROTOHEME_FE2
R439	FPP + PROTOHEME_FE2 = HEME_FE2 + PPI	0	10		#	FPP + PROTOHEME_FE2 = HEME_FE2 + PPI
R440	2.0 SAM + UROPORPHYRINOGEN_III = PRECORIN_2 + 2.0 SAH	0	10	Rv2847c OR Rv0511	#	2.0 SAM + UROPORPHYRINOGEN_III = PRECORIN_2 + 2.0 SAH
R441	PRECORIN_2 + SAM = PRECORIN_3A + SAH	0	10	Rv2066	#	PRECORIN_2 + SAM = PRECORIN_3A + SAH
R442	O2 + PRECORIN_3A = PRECORIN_3B	0	10	Rv2064	#	O2 + PRECORIN_3A = PRECORIN_3B
R443	PRECORIN_3B + SAM = PRECORIN_4B + SAH	0	10	Rv2066	#	PRECORIN_3B + SAM = PRECORIN_4B + SAH
R444	PRECORIN_4B + SAM = PRECORIN_5 + SAH	0	10	Rv2071c	#	PRECORIN_4B + SAM = PRECORIN_5 + SAH
R445	PRECORIN_5 + SAM = AC + PRECORIN_6X + SAH	0	10		#	PRECORIN_5 + SAM = AC + PRECORIN_6X + SAH
R446	PRECORIN_6X + NADPH + 2 H = PRECORIN_6Y + NADP	0	10	Rv2070c	#	PRECORIN_6X + NADPH + 2 H = PRECORIN_6Y + NADP
R447	PRECORIN_6Y + 2 SAM = PRECORIN_8X + 2 SAH + CO2 + 3 H	0	10	Rv2072c	#	PRECORIN_6Y + 2 SAM = PRECORIN_8X + 2 SAH + CO2 + 3 H
R448	PRECORIN_8X = HYDROGENOBYRINATE	0	10	Rv2065	#	PRECORIN_8X = HYDROGENOBYRINATE
R449	2.0 ATP + 2.0 GLN + HYDROGENOBYRINATE = 2.0 ADP + 2.0 GLU + HYDROGENOBYRINATE_A_C_DIAMIDE + 2.0 PI	0	10	Rv2848c	#	2.0 ATP + 2.0 GLN + HYDROGENOBYRINATE = 2.0 ADP + 2.0 GLU + HYDROGENOBYRINATE_A_C_DIAMIDE + 2.0 PI
R450	ATP + CO_II + HYDROGENOBYRINATE_A_C_DIAMIDE = ADP + COB_II_RINICACID_A_C_DIAMIDE + PI	0	10		#	ATP + CO_II + HYDROGENOBYRINATE_A_C_DIAMIDE = ADP + COB_II_RINICACID_A_C_DIAMIDE + PI
R451	COB_II_RINICACID_A_C_DIAMIDE + NADH = COB_I_RINICACID_A_C_DIAMIDE + NAD	0	10		#	COB_II_RINICACID_A_C_DIAMIDE + NADH = COB_I_RINICACID_A_C_DIAMIDE + NAD
R452	ATP + COB_I_RINICACID_A_C_DIAMIDE = ADENOSYL_COBRINICACID_A_C_DIAMIDE + PPI	0	10	Rv2849c	#	ATP + COB_I_RINICACID_A_C_DIAMIDE = ADENOSYL_COBRINICACID_A_C_DIAMIDE + PPI
R453	ADENOSYL_COBRINICACID_A_C_DIAMIDE + 4.0 ATP + 4.0 GLN = ADENOSYL_COBRATE + 4.0 ADP + 4.0 GLU + 4.0 PI	0	10	Rv0255c	#	ADENOSYL_COBRINICACID_A_C_DIAMIDE + 4.0 ATP + 4.0 GLN = ADENOSYL_COBRATE + 4.0 ADP + 4.0 GLU + 4.0 PI
R454	1_AMINO_PROPAN_2_OL + ADENOSYL_COBRATE = ADENOSYLCOBINAMIDE	0	10	Rv2231c	#	1_AMINO_PROPAN_2_OL + ADENOSYL_COBRATE = ADENOSYLCOBINAMIDE
R455	ADENOSYLCOBINAMIDE + ATP = ADENOSYLCOBINIMIDE_P + ADP	0	10	Rv0254c	#	ADENOSYLCOBINAMIDE + ATP = ADENOSYLCOBINIMIDE_P + ADP
R456	ADENOSYLCOBINIMIDE_P + GTP = ADENOSYLCOBINAMIDE_GDP + PPI	0	10	Rv0254c	#	ADENOSYLCOBINIMIDE_P + GTP = ADENOSYLCOBINAMIDE_GDP + PPI
R457	ADENOSYLCOBINAMIDE_GDP = COB_I + GMP	0	10	Rv2208	#	ADENOSYLCOBINAMIDE_GDP = COB_I + GMP
R457b	ADENOSYLCOBINAMIDE_GDP + ARP = ADOCBL + GMP	0	10	Rv2208	#	ADENOSYLCOBINAMIDE_GDP + ARP = ADOCBL + GMP
R457c	ADOCBL = COB_I + 2 H + PI	0	10		#	ADOCBL = COB_I + 2 H + PI
R458	COB_II + NADH = COB_I + NAD	-10	10		#	COB_II + NADH = COB_I + NAD
R459	COB_III + NADH = COB_II + NAD	-10	10		#	COB_III + NADH = COB_II + NAD
R460	ATP + CYS + MOAD_COOH = AMP + MOAD_COSH + PPI + SER	0	10	Rv3206c AND Rv3025c	#	ATP + CYS + MOAD_COOH = AMP + MOAD_COSH + PPI + SER
R461	GTP = PPI + PRECURSOR_Z	0	10	Rv3109 AND Rv3116 AND Rv3111	#	GTP = PPI + PRECURSOR_Z
R462	MOAD_COSH + PRECURSOR_Z = MOLYBDOPTERIN + MOAD_COOH	0	10	Rv3119 OR Rv0866 AND Rv3322c	#	MOAD_COSH + PRECURSOR_Z = MOLYBDOPTERIN + MOAD_COOH
R463	MO2 + MOLYBDOPTERIN = MOLYBDENUM	0	10	Rv3119 OR Rv0866 AND Rv3322c	#	MO2 + MOLYBDOPTERIN = MOLYBDENUM
R464	GTP + MOLYBDENUM = MOLYBDOPTERIN_GDP + PPI	0	10	Rv2453c	#	GTP + MOLYBDENUM = MOLYBDOPTERIN_GDP + PPI
R465	TYR = TS_COSH_TYR	0	10		#	TYR = TS_COSH_TYR
R466	TS_PROTEIN = TS_COSH_TYR	0	10		#	TS_PROTEIN = TS_COSH_TYR
R467	AIR = AHMMP	0	10	Rv0423c	#	AIR = AHMMP
R468	AHMMP + ATP = ADP + AMPMP	0	10	Rv0422c	#	AHMMP + ATP = ADP + AMPMP
R469	AMPMP + ATP = ADP + MAHMPPP	0	10	Rv0422c	#	AMPMP + ATP = ADP + MAHMPPP
R470	DX5P + TS_COSH_TYR = HEMT + TS_PROTEIN	0	10	Rv0417	#	DX5P + TS_COSH_TYR = HEMT + TS_PROTEIN
R471	ATP + HEMT = ADP + MPET	0	10		#	ATP + HEMT = ADP + MPET
R472	MAHMPPP + MPET = PPI + THIP	0	10	Rv0414c	#	MAHMPPP + MPET = PPI + THIP
R473	THIP = PI + THI	0	10		#	THIP = PI + THI
R474	THI = AHMMP + HEMT	0	10		#	THI = AHMMP + HEMT
R475	GTP + LLAC = 2_PHOSPHO_L_LACTATE + GDP	0	10		#	GTP + LLAC = 2_PHOSPHO_L_LACTATE + GDP
R476	2_PHOSPHO_L_LACTATE + GTP = LPPG + PPI	0	10		#	2_PHOSPHO_L_LACTATE + GTP = LPPG + PPI
R477	4HPP + A6RP = FO + NH3	0	10	Rv1173	#	4HPP + A6RP = FO + NH3
R478	FO + LPPG = F420_0 + GMP	0	10	Rv3261 AND Rv3262	#	FO + LPPG = F420_0 + GMP
R479	5.0 ATP + F420_0 + 5.0 GLU = F420	0	10	Rv3261 AND Rv3263	#	5.0 ATP + F420_0 + 5.0 GLU = F420
R480	IP + UDPNAG = NAG_INS + PI + UDP	0	10	Rv0486	#	IP + UDPNAG = NAG_INS + PI + UDP
R481	NAG_INS = AC + NG_INS	0	10	Rv1170	#	NAG_INS = AC + NG_INS
R482	ATP + CYS + NG_INS = AMP + CYS_NG_INS + PPI	0	10	Rv2130	#	ATP + CYS + NG_INS = AMP + CYS_NG_INS + PPI
R483	ACCOA + CYS_NG_INS = COA + MYCOTHIOL	0	10	Rv0819	#	ACCOA + CYS_NG_INS = COA + MYCOTHIOL
R484	ELECTROPHILE_X + MYCOTHIOL = H2X + MYCOTHIOL_S_CONJUGATE	0	10		#	ELECTROPHILE_X + MYCOTHIOL = H2X + MYCOTHIOL_S_CONJUGATE
R484b	MYCOTHIOL_S_CONJUGATE = N_ACETYL_S_CONJUGATE + 0.999 NG_INS	0	10	Rv1082	#	MYCOTHIOL_S_CONJUGATE = N_ACETYL_S_CONJUGATE + 0.999 NG_INS
R485	ICHOR = PYR + SAL	0	10		#	ICHOR = PYR + SAL
R486	2.0 COA = MBT_HOLO	0	10	Rv2523c	#	2.0 COA = MBT_HOLO
R487	ATP + MBT_HOLO + SAL = AMP + MBTA_SAL + PPI	0	10	Rv2384	#	ATP + MBT_HOLO + SAL = AMP + MBTA_SAL + PPI
R488	ATP + MBT_HOLO + SER = AMP + MBTB_SER + PPI	0	10	Rv2383c	#	ATP + MBT_HOLO + SER = AMP + MBTB_SER + PPI
R489	ATP + LYS + MBT_HOLO = AMP + MBTE_LYS + PPI	0	10	Rv2380c	#	ATP + LYS + MBT_HOLO = AMP + MBTE_LYS + PPI
R490	ATP + LYS + MBT_HOLO = AMP + MBTF_LYS + PPI	0	10	Rv2380c	#	ATP + LYS + MBT_HOLO = AMP + MBTF_LYS + PPI
R491	ACCOA + MALCOA + MBT_HOLO = 2.0 COA + MBTCD_HBA	0	10	Rv2382c AND Rv2381c	#	ACCOA + MALCOA + MBT_HOLO = 2.0 COA + MBTCD_HBA
R492	MBTA_SAL + MBTB_SER + MBTCD_HBA + MBTE_LYS + MBTF_LYS = MBT + 5.0 MBT_HOLO	0	10		#	MBTA_SAL + MBTB_SER + MBTCD_HBA + MBTE_LYS + MBTF_LYS = MBT + 5.0 MBT_HOLO
R493	2.0 ACCOA + MBT + 2.0 NADPH = 2.0 COA + MBTSEC + 2.0 NADP	0	10		#	2.0 ACCOA + MBT + 2.0 NADPH = 2.0 COA + MBTSEC + 2.0 NADP
R494	9.0 ACCOA + MBT + 18.0 NADPH = 9.0 COA + MBTWALL + 18.0 NADP	0	10		#	9.0 ACCOA + MBT + 18.0 NADPH = 9.0 COA + MBTWALL + 18.0 NADP
R495	ACCOA + BIOTIN_CO2 = 0.999 BIOTIN + MALCOA	0	10	Rv0904c OR Rv2502c OR Rv0974c OR Rv0904c OR Rv3799c OR Rv3280 OR Rv2247	#	ACCOA + BIOTIN_CO2 = 0.999 BIOTIN + MALCOA
R496	ACCOA + ACP = ACACP + COA	-10	10	Rv2243 OR Rv0649 AND Rv2244	#	ACCOA + ACP = ACACP + COA
R497	ACACP + 2.0 MALACP + 4.0 NADPH = 2.0 ACP + 2.0 CO2 + HEXANOYL_ACP + 4.0 NADP	0	10	Rv2524c	#	ACACP + 2.0 MALACP + 4.0 NADPH = 2.0 ACP + 2.0 CO2 + HEXANOYL_ACP + 4.0 NADP
R497b	ACACP + 4.0 MALACP + 8.0 NADPH = 4.0 ACP + 4.0 CO2 + 8.0 NADP + OCTANOYL_ACP	0	10	Rv2524c	#	ACACP + 4.0 MALACP + 8.0 NADPH = 4.0 ACP + 4.0 CO2 + 8.0 NADP + OCTANOYL_ACP
R498	ACACP + 6.0 MALACP + 12.0 NADPH = 6.0 ACP + 6.0 CO2 + 12.0 NADP + TETRADECANOYL_ACP	0	10	Rv2524c	#	ACACP + 6.0 MALACP + 12.0 NADPH = 6.0 ACP + 6.0 CO2 + 12.0 NADP + TETRADECANOYL_ACP
R499	ACACP + 7.0 MALACP + 14.0 NADPH = 7.0 ACP + 7.0 CO2 + HEXADECANOYL_ACP + 14.0 NADP	0	10	Rv2524c	#	ACACP + 7.0 MALACP + 14.0 NADPH = 7.0 ACP + 7.0 CO2 + HEXADECANOYL_ACP + 14.0 NADP
R500	ACACP + 7.0 MALACP + 13.0 NADPH = 9_HEXADECENOYL_ACP + 7.0 ACP + 7.0 CO2 + 13.0 NADP	0	10	Rv2524c	#	ACACP + 7.0 MALACP + 13.0 NADPH = 9_HEXADECENOYL_ACP + 7.0 ACP + 7.0 CO2 + 13.0 NADP
R501	ACACP + 8.0 MALACP + 16.0 NADPH = 8.0 ACP + 8.0 CO2 + 16.0 NADP + OCTADECANOYL_ACP	0	10	Rv2524c	#	ACACP + 8.0 MALACP + 16.0 NADPH = 8.0 ACP + 8.0 CO2 + 16.0 NADP + OCTADECANOYL_ACP
R502	ACACP + 8.0 MALACP + 15.0 NADPH = 9_OCTADECENOYL_ACP + 8.0 ACP + 8.0 CO2 + 15.0 NADP	0	10	Rv2524c	#	ACACP + 8.0 MALACP + 15.0 NADPH = 9_OCTADECENOYL_ACP + 8.0 ACP + 8.0 CO2 + 15.0 NADP
R503	ACACP + 9.0 MALACP + 18.0 NADPH = 9.0 ACP + 9.0 CO2 + EICOSANOYL_ACP + 18.0 NADP	0	10	Rv2524c	#	ACACP + 9.0 MALACP + 18.0 NADPH = 9.0 ACP + 9.0 CO2 + EICOSANOYL_ACP + 18.0 NADP
R504	ACACP + 10.0 MALACP + 20.0 NADPH = 10.0 ACP + 10.0 CO2 + DOCOSANOYL_ACP + 20.0 NADP	0	10	Rv2524c	#	ACACP + 10.0 MALACP + 20.0 NADPH = 10.0 ACP + 10.0 CO2 + DOCOSANOYL_ACP + 20.0 NADP
R505	ACACP + 11.0 MALACP + 22.0 NADPH = 11.0 ACP + 11.0 CO2 + 22.0 NADP + TETRACOSANOYL_ACP	0	10	Rv2524c	#	ACACP + 11.0 MALACP + 22.0 NADPH = 11.0 ACP + 11.0 CO2 + 22.0 NADP + TETRACOSANOYL_ACP
R506	ACACP + 12.0 MALACP + 24.0 NADPH = 12.0 ACP + 12.0 CO2 + HEXACOSANOYL_ACP + 24.0 NADP	0	10	Rv2524c	#	ACACP + 12.0 MALACP + 24.0 NADPH = 12.0 ACP + 12.0 CO2 + HEXACOSANOYL_ACP + 24.0 NADP
R507	ACACP + 13.0 MALACP + 26.0 NADPH = 13.0 ACP + 13.0 CO2 + 26.0 NADP + OCTACOSANOYL_ACP	0	10	Rv2524c	#	ACACP + 13.0 MALACP + 26.0 NADPH = 13.0 ACP + 13.0 CO2 + 26.0 NADP + OCTACOSANOYL_ACP
R508	BIOTIN_CO2 + HEXACOSANOYL_COA = BIOTIN + HEXACOSANOYL_COA_CO2	0	10	Rv3280 AND Rv3799c AND Rv3285	#	BIOTIN_CO2 + HEXACOSANOYL_COA = BIOTIN + HEXACOSANOYL_COA_CO2
R509	COA + HEXANOYL_ACP = ACP + HEXANOYL_COA	-10	10	Rv2243 OR Rv0649 AND Rv2244	#	COA + HEXANOYL_ACP = ACP + HEXANOYL_COA
R510	COA + TETRADECANOYL_ACP = ACP + TETRADECANOYL_COA	-10	10	Rv2243 OR Rv0649 AND Rv2244	#	COA + TETRADECANOYL_ACP = ACP + TETRADECANOYL_COA
R511	COA + HEXADECANOYL_ACP = ACP + HEXADECANOYL_COA	-10	10	Rv2243 OR Rv0649 AND Rv2244	#	COA + HEXADECANOYL_ACP = ACP + HEXADECANOYL_COA
R512	9_HEXADECENOYL_ACP + COA = 9_HEXADECENOYL_COA + ACP	-10	10	Rv2243 OR Rv0649 AND Rv2244	#	9_HEXADECENOYL_ACP + COA = 9_HEXADECENOYL_COA + ACP
R513	COA + OCTADECANOYL_ACP = ACP + OCTADECANOYL_COA	-10	10	Rv2243 OR Rv0649 AND Rv2244	#	COA + OCTADECANOYL_ACP = ACP + OCTADECANOYL_COA
R514	9_OCTADECENOYL_ACP + COA = 9_OCTADECENOYL_COA + ACP	-10	10	Rv2243 OR Rv0649 AND Rv2244	#	9_OCTADECENOYL_ACP + COA = 9_OCTADECENOYL_COA + ACP
R515	COA + EICOSANOYL_ACP = ACP + EICOSANOYL_COA	-10	10	Rv2243 OR Rv0649 AND Rv2244	#	COA + EICOSANOYL_ACP = ACP + EICOSANOYL_COA
R516	COA + DOCOSANOYL_ACP = ACP + DOCOSANOYL_COA	-10	10	Rv2243 OR Rv0649 AND Rv2244	#	COA + DOCOSANOYL_ACP = ACP + DOCOSANOYL_COA
R517	COA + TETRACOSANOYL_ACP = ACP + TETRACOSANOYL_COA	-10	10	Rv2243 OR Rv0649 AND Rv2244	#	COA + TETRACOSANOYL_ACP = ACP + TETRACOSANOYL_COA
R518	COA + HEXACOSANOYL_ACP = ACP + HEXACOSANOYL_COA	-10	10	Rv2243 OR Rv0649 AND Rv2244	#	COA + HEXACOSANOYL_ACP = ACP + HEXACOSANOYL_COA
R519	COA + OCTACOSANOYL_ACP = ACP + OCTACOSANOYL_COA	-10	10	Rv2243 OR Rv0649 AND Rv2244	#	COA + OCTACOSANOYL_ACP = ACP + OCTACOSANOYL_COA
R520	COA + NONADECANOYL_ACP = ACP + NONADECANOYL_COA	-10	10	Rv2243 OR Rv0649 AND Rv2244	#	COA + NONADECANOYL_ACP = ACP + NONADECANOYL_COA
R521	COA + HEPTADECANOYL_ACP = ACP + HEPTADECANOYL_COA	-10	10	Rv2243 OR Rv0649 AND Rv2244	#	COA + HEPTADECANOYL_ACP = ACP + HEPTADECANOYL_COA
R522	COA + PENTADECANOYL_ACP = ACP + PENTADECANOYL_COA	-10	10	Rv2243 OR Rv0649 AND Rv2244	#	COA + PENTADECANOYL_ACP = ACP + PENTADECANOYL_COA
R533	ACP + PROPIONYLCOA = COA + PROPIONYLACP	0	10	Rv2243 OR Rv0649 AND Rv2244	#	ACP + PROPIONYLCOA = COA + PROPIONYLACP
R534	6.0 MALACP + 12.0 NADPH + PROPIONYLACP = 6.0 ACP + 6.0 CO2 + 12.0 NADP + PENTADECANOYL_ACP	0	10	Rv2524c	#	6.0 MALACP + 12.0 NADPH + PROPIONYLACP = 6.0 ACP + 6.0 CO2 + 12.0 NADP + PENTADECANOYL_ACP
R535	MALACP + 2.0 NADPH + PENTADECANOYL_ACP = ACP + CO2 + HEPTADECANOYL_ACP + 2.0 NADP	0	10	Rv2524c	#	MALACP + 2.0 NADPH + PENTADECANOYL_ACP = ACP + CO2 + HEPTADECANOYL_ACP + 2.0 NADP
R536	HEPTADECANOYL_ACP + MALACP + 2.0 NADPH = ACP + CO2 + 2.0 NADP + NONADECANOYL_ACP	0	10	Rv2524c	#	HEPTADECANOYL_ACP + MALACP + 2.0 NADPH = ACP + CO2 + 2.0 NADP + NONADECANOYL_ACP
R537	ATP + COA + HEXANOATE = AMP + HEXANOYL_COA + PPI	0	10	Rv0035 OR Rv0099 OR Rv0119 OR Rv0166 OR Rv0214 OR Rv0270 OR Rv0275c OR Rv0404 OR Rv0551c OR Rv0852 OR Rv1058 OR Rv1185c OR Rv1193 OR Rv1206 OR Rv1345 OR Rv1427c OR Rv1521 OR Rv1529 OR Rv1750c OR Rv1925 OR Rv2187 OR Rv2505c OR Rv2590 OR Rv2930 OR Rv2941 OR Rv2948c OR Rv2950c OR Rv3089 OR Rv3506 OR Rv3513c OR Rv3515c OR Rv3561 OR Rv3801c OR Rv3826	#	ATP + COA + HEXANOATE = AMP + HEXANOYL_COA + PPI
R538	ATP + COA + DECANOATE = AMP + DECANOYL_COA + PPI	0	10	Rv0035 OR Rv0099 OR Rv0119 OR Rv0166 OR Rv0214 OR Rv0270 OR Rv0275c OR Rv0404 OR Rv0551c OR Rv0852 OR Rv1058 OR Rv1185c OR Rv1193 OR Rv1206 OR Rv1345 OR Rv1427c OR Rv1521 OR Rv1529 OR Rv1750c OR Rv1925 OR Rv2187 OR Rv2505c OR Rv2590 OR Rv2930 OR Rv2941 OR Rv2948c OR Rv2950c OR Rv3089 OR Rv3506 OR Rv3513c OR Rv3515c OR Rv3561 OR Rv3801c OR Rv3826	#	ATP + COA + DECANOATE = AMP + DECANOYL_COA + PPI
R539	ATP + COA + DODECANOATE = AMP + DODECANOYL_COA + PPI	0	10	Rv0035 OR Rv0099 OR Rv0119 OR Rv0166 OR Rv0214 OR Rv0270 OR Rv0275c OR Rv0404 OR Rv0551c OR Rv0852 OR Rv1058 OR Rv1185c OR Rv1193 OR Rv1206 OR Rv1345 OR Rv1427c OR Rv1521 OR Rv1529 OR Rv1750c OR Rv1925 OR Rv2187 OR Rv2505c OR Rv2590 OR Rv2930 OR Rv2941 OR Rv2948c OR Rv2950c OR Rv3089 OR Rv3506 OR Rv3513c OR Rv3515c OR Rv3561 OR Rv3801c OR Rv3826	#	ATP + COA + DODECANOATE = AMP + DODECANOYL_COA + PPI
R540	ATP + COA + TETRADECANOATE = AMP + PPI + TETRADECANOYL_COA	0	10	Rv0035 OR Rv0099 OR Rv0119 OR Rv0166 OR Rv0214 OR Rv0270 OR Rv0275c OR Rv0404 OR Rv0551c OR Rv0852 OR Rv1058 OR Rv1185c OR Rv1193 OR Rv1206 OR Rv1345 OR Rv1427c OR Rv1521 OR Rv1529 OR Rv1750c OR Rv1925 OR Rv2187 OR Rv2505c OR Rv2590 OR Rv2930 OR Rv2941 OR Rv2948c OR Rv2950c OR Rv3089 OR Rv3506 OR Rv3513c OR Rv3515c OR Rv3561 OR Rv3801c OR Rv3826	#	ATP + COA + TETRADECANOATE = AMP + PPI + TETRADECANOYL_COA
R541	ATP + COA + HEXADECANOATE = AMP + HEXADECANOYL_COA + PPI	0	10	Rv0035 OR Rv0099 OR Rv0119 OR Rv0166 OR Rv0214 OR Rv0270 OR Rv0275c OR Rv0404 OR Rv0551c OR Rv0852 OR Rv1058 OR Rv1185c OR Rv1193 OR Rv1206 OR Rv1345 OR Rv1427c OR Rv1521 OR Rv1529 OR Rv1750c OR Rv1925 OR Rv2187 OR Rv2505c OR Rv2590 OR Rv2930 OR Rv2941 OR Rv2948c OR Rv2950c OR Rv3089 OR Rv3506 OR Rv3513c OR Rv3515c OR Rv3561 OR Rv3801c OR Rv3826	#	ATP + COA + HEXADECANOATE = AMP + HEXADECANOYL_COA + PPI
R542	9_HEXADECENOATE + ATP + COA = 9_HEXADECENOYL_COA + AMP + PPI	0	10	Rv0035 OR Rv0099 OR Rv0119 OR Rv0166 OR Rv0214 OR Rv0270 OR Rv0275c OR Rv0404 OR Rv0551c OR Rv0852 OR Rv1058 OR Rv1185c OR Rv1193 OR Rv1206 OR Rv1345 OR Rv1427c OR Rv1521 OR Rv1529 OR Rv1750c OR Rv1925 OR Rv2187 OR Rv2505c OR Rv2590 OR Rv2930 OR Rv2941 OR Rv2948c OR Rv2950c OR Rv3089 OR Rv3506 OR Rv3513c OR Rv3515c OR Rv3561 OR Rv3801c OR Rv3826	#	9_HEXADECENOATE + ATP + COA = 9_HEXADECENOYL_COA + AMP + PPI
R543	ATP + COA + OCTADECANOATE = AMP + OCTADECANOYL_COA + PPI	0	10	Rv0035 OR Rv0099 OR Rv0119 OR Rv0166 OR Rv0214 OR Rv0270 OR Rv0275c OR Rv0404 OR Rv0551c OR Rv0852 OR Rv1058 OR Rv1185c OR Rv1193 OR Rv1206 OR Rv1345 OR Rv1427c OR Rv1521 OR Rv1529 OR Rv1750c OR Rv1925 OR Rv2187 OR Rv2505c OR Rv2590 OR Rv2930 OR Rv2941 OR Rv2948c OR Rv2950c OR Rv3089 OR Rv3506 OR Rv3513c OR Rv3515c OR Rv3561 OR Rv3801c OR Rv3826	#	ATP + COA + OCTADECANOATE = AMP + OCTADECANOYL_COA + PPI
R544	9_OCTADECENOATE + ATP + COA = 9_OCTADECENOYL_COA + AMP + PPI	0	10	Rv0035 OR Rv0099 OR Rv0119 OR Rv0166 OR Rv0214 OR Rv0270 OR Rv0275c OR Rv0404 OR Rv0551c OR Rv0852 OR Rv1058 OR Rv1185c OR Rv1193 OR Rv1206 OR Rv1345 OR Rv1427c OR Rv1521 OR Rv1529 OR Rv1750c OR Rv1925 OR Rv2187 OR Rv2505c OR Rv2590 OR Rv2930 OR Rv2941 OR Rv2948c OR Rv2950c OR Rv3089 OR Rv3506 OR Rv3513c OR Rv3515c OR Rv3561 OR Rv3801c OR Rv3826	#	9_OCTADECENOATE + ATP + COA = 9_OCTADECENOYL_COA + AMP + PPI
R545	ATP + COA + EICOSANOATE = AMP + EICOSANOYL_COA + PPI	0	10	Rv0035 OR Rv0099 OR Rv0119 OR Rv0166 OR Rv0214 OR Rv0270 OR Rv0275c OR Rv0404 OR Rv0551c OR Rv0852 OR Rv1058 OR Rv1185c OR Rv1193 OR Rv1206 OR Rv1345 OR Rv1427c OR Rv1521 OR Rv1529 OR Rv1750c OR Rv1925 OR Rv2187 OR Rv2505c OR Rv2590 OR Rv2930 OR Rv2941 OR Rv2948c OR Rv2950c OR Rv3089 OR Rv3506 OR Rv3513c OR Rv3515c OR Rv3561 OR Rv3801c OR Rv3826	#	ATP + COA + EICOSANOATE = AMP + EICOSANOYL_COA + PPI
R546	ATP + COA + DOCOSANOATE = AMP + DOCOSANOYL_COA + PPI	0	10	Rv0035 OR Rv0099 OR Rv0119 OR Rv0166 OR Rv0214 OR Rv0270 OR Rv0275c OR Rv0404 OR Rv0551c OR Rv0852 OR Rv1058 OR Rv1185c OR Rv1193 OR Rv1206 OR Rv1345 OR Rv1427c OR Rv1521 OR Rv1529 OR Rv1750c OR Rv1925 OR Rv2187 OR Rv2505c OR Rv2590 OR Rv2930 OR Rv2941 OR Rv2948c OR Rv2950c OR Rv3089 OR Rv3506 OR Rv3513c OR Rv3515c OR Rv3561 OR Rv3801c OR Rv3826	#	ATP + COA + DOCOSANOATE = AMP + DOCOSANOYL_COA + PPI
R547	ATP + COA + TETRACOSANOATE = AMP + PPI + TETRACOSANOYL_COA	0	10	Rv0035 OR Rv0099 OR Rv0119 OR Rv0166 OR Rv0214 OR Rv0270 OR Rv0275c OR Rv0404 OR Rv0551c OR Rv0852 OR Rv1058 OR Rv1185c OR Rv1193 OR Rv1206 OR Rv1345 OR Rv1427c OR Rv1521 OR Rv1529 OR Rv1750c OR Rv1925 OR Rv2187 OR Rv2505c OR Rv2590 OR Rv2930 OR Rv2941 OR Rv2948c OR Rv2950c OR Rv3089 OR Rv3506 OR Rv3513c OR Rv3515c OR Rv3561 OR Rv3801c OR Rv3826	#	ATP + COA + TETRACOSANOATE = AMP + PPI + TETRACOSANOYL_COA
R548	ATP + COA + HEXACOSANOATE = AMP + HEXACOSANOYL_COA + PPI	0	10	Rv0035 OR Rv0099 OR Rv0119 OR Rv0166 OR Rv0214 OR Rv0270 OR Rv0275c OR Rv0404 OR Rv0551c OR Rv0852 OR Rv1058 OR Rv1185c OR Rv1193 OR Rv1206 OR Rv1345 OR Rv1427c OR Rv1521 OR Rv1529 OR Rv1750c OR Rv1925 OR Rv2187 OR Rv2505c OR Rv2590 OR Rv2930 OR Rv2941 OR Rv2948c OR Rv2950c OR Rv3089 OR Rv3506 OR Rv3513c OR Rv3515c OR Rv3561 OR Rv3801c OR Rv3826	#	ATP + COA + HEXACOSANOATE = AMP + HEXACOSANOYL_COA + PPI
R549	ATP + COA + PENTADECANOATE = AMP + PENTADECANOYL_COA + PPI	0	10	Rv0035 OR Rv0099 OR Rv0119 OR Rv0166 OR Rv0214 OR Rv0270 OR Rv0275c OR Rv0404 OR Rv0551c OR Rv0852 OR Rv1058 OR Rv1185c OR Rv1193 OR Rv1206 OR Rv1345 OR Rv1427c OR Rv1521 OR Rv1529 OR Rv1750c OR Rv1925 OR Rv2187 OR Rv2505c OR Rv2590 OR Rv2930 OR Rv2941 OR Rv2948c OR Rv2950c OR Rv3089 OR Rv3506 OR Rv3513c OR Rv3515c OR Rv3561 OR Rv3801c OR Rv3826	#	ATP + COA + PENTADECANOATE = AMP + PENTADECANOYL_COA + PPI
R550	ATP + COA + HEPTADECANOATE = AMP + HEPTADECANOYL_COA + PPI	0	10	Rv0035 OR Rv0099 OR Rv0119 OR Rv0166 OR Rv0214 OR Rv0270 OR Rv0275c OR Rv0404 OR Rv0551c OR Rv0852 OR Rv1058 OR Rv1185c OR Rv1193 OR Rv1206 OR Rv1345 OR Rv1427c OR Rv1521 OR Rv1529 OR Rv1750c OR Rv1925 OR Rv2187 OR Rv2505c OR Rv2590 OR Rv2930 OR Rv2941 OR Rv2948c OR Rv2950c OR Rv3089 OR Rv3506 OR Rv3513c OR Rv3515c OR Rv3561 OR Rv3801c OR Rv3826	#	ATP + COA + HEPTADECANOATE = AMP + HEPTADECANOYL_COA + PPI
R551	ATP + COA + NONADECANOATE = AMP + NONADECANOYL_COA + PPI	0	10	Rv0035 OR Rv0099 OR Rv0119 OR Rv0166 OR Rv0214 OR Rv0270 OR Rv0275c OR Rv0404 OR Rv0551c OR Rv0852 OR Rv1058 OR Rv1185c OR Rv1193 OR Rv1206 OR Rv1345 OR Rv1427c OR Rv1521 OR Rv1529 OR Rv1750c OR Rv1925 OR Rv2187 OR Rv2505c OR Rv2590 OR Rv2930 OR Rv2941 OR Rv2948c OR Rv2950c OR Rv3089 OR Rv3506 OR Rv3513c OR Rv3515c OR Rv3561 OR Rv3801c OR Rv3826	#	ATP + COA + NONADECANOATE = AMP + NONADECANOYL_COA + PPI
R552	COA + FAD + NAD + OCTACOSANOYL_COA = ACCOA + FADH2 + HEXACOSANOYL_COA + NADH	0	10	Rv0131c OR Rv0154c OR Rv0215c OR Rv0231 OR Rv0244c OR Rv0271c OR Rv0400c OR Rv0752c OR Rv0873 OR Rv0972c OR Rv0975c OR Rv1346 OR Rv1467c OR Rv1679 OR Rv1933c OR Rv1934c OR Rv2724c OR Rv2789c OR Rv3061c OR Rv3139 OR Rv3140 OR Rv3274c OR Rv3504 OR Rv3505 OR Rv3543c OR Rv3544c OR Rv3560c OR Rv3562 OR Rv3563 OR Rv3564 OR Rv3573c OR Rv3761c OR Rv3797 OR Rv0672 OR Rv2500c AND Rv0222 OR Rv0456c OR Rv063…	#	COA + FAD + NAD + OCTACOSANOYL_COA = ACCOA + FADH2 + HEXACOSANOYL_COA + NADH
R553	COA + FAD + HEXACOSANOYL_COA + NAD = ACCOA + FADH2 + NADH + TETRACOSANOYL_COA	0	10	Rv0131c OR Rv0154c OR Rv0215c OR Rv0231 OR Rv0244c OR Rv0271c OR Rv0400c OR Rv0752c OR Rv0873 OR Rv0972c OR Rv0975c OR Rv1346 OR Rv1467c OR Rv1679 OR Rv1933c OR Rv1934c OR Rv2724c OR Rv2789c OR Rv3061c OR Rv3139 OR Rv3140 OR Rv3274c OR Rv3504 OR Rv3505 OR Rv3543c OR Rv3544c OR Rv3560c OR Rv3562 OR Rv3563 OR Rv3564 OR Rv3573c OR Rv3761c OR Rv3797 OR Rv0672 OR Rv2500c AND Rv0222 OR Rv0456c OR Rv063…	#	COA + FAD + HEXACOSANOYL_COA + NAD = ACCOA + FADH2 + NADH + TETRACOSANOYL_COA
R554	COA + FAD + NAD + TETRACOSANOYL_COA = ACCOA + DOCOSANOYL_COA + FADH2 + NADH	0	10	Rv0131c OR Rv0154c OR Rv0215c OR Rv0231 OR Rv0244c OR Rv0271c OR Rv0400c OR Rv0752c OR Rv0873 OR Rv0972c OR Rv0975c OR Rv1346 OR Rv1467c OR Rv1679 OR Rv1933c OR Rv1934c OR Rv2724c OR Rv2789c OR Rv3061c OR Rv3139 OR Rv3140 OR Rv3274c OR Rv3504 OR Rv3505 OR Rv3543c OR Rv3544c OR Rv3560c OR Rv3562 OR Rv3563 OR Rv3564 OR Rv3573c OR Rv3761c OR Rv3797 OR Rv0672 OR Rv2500c AND Rv0222 OR Rv0456c OR Rv063…	#	COA + FAD + NAD + TETRACOSANOYL_COA = ACCOA + DOCOSANOYL_COA + FADH2 + NADH
R555	COA + DOCOSANOYL_COA + FAD + NAD = ACCOA + EICOSANOYL_COA + FADH2 + NADH	0	10	Rv0131c OR Rv0154c OR Rv0215c OR Rv0231 OR Rv0244c OR Rv0271c OR Rv0400c OR Rv0752c OR Rv0873 OR Rv0972c OR Rv0975c OR Rv1346 OR Rv1467c OR Rv1679 OR Rv1933c OR Rv1934c OR Rv2724c OR Rv2789c OR Rv3061c OR Rv3139 OR Rv3140 OR Rv3274c OR Rv3504 OR Rv3505 OR Rv3543c OR Rv3544c OR Rv3560c OR Rv3562 OR Rv3563 OR Rv3564 OR Rv3573c OR Rv3761c OR Rv3797 OR Rv0672 OR Rv2500c AND Rv0222 OR Rv0456c OR Rv063…	#	COA + DOCOSANOYL_COA + FAD + NAD = ACCOA + EICOSANOYL_COA + FADH2 + NADH
R556	COA + EICOSANOYL_COA + FAD + NAD = ACCOA + FADH2 + NADH + OCTADECANOYL_COA	0	10	Rv0131c OR Rv0154c OR Rv0215c OR Rv0231 OR Rv0244c OR Rv0271c OR Rv0400c OR Rv0752c OR Rv0873 OR Rv0972c OR Rv0975c OR Rv1346 OR Rv1467c OR Rv1679 OR Rv1933c OR Rv1934c OR Rv2724c OR Rv2789c OR Rv3061c OR Rv3139 OR Rv3140 OR Rv3274c OR Rv3504 OR Rv3505 OR Rv3543c OR Rv3544c OR Rv3560c OR Rv3562 OR Rv3563 OR Rv3564 OR Rv3573c OR Rv3761c OR Rv3797 OR Rv0672 OR Rv2500c AND Rv0222 OR Rv0456c OR Rv063…	#	COA + EICOSANOYL_COA + FAD + NAD = ACCOA + FADH2 + NADH + OCTADECANOYL_COA
R557	COA + FAD + NAD + OCTADECANOYL_COA = ACCOA + FADH2 + HEXADECANOYL_COA + NADH	0	10	Rv0131c OR Rv0154c OR Rv0215c OR Rv0231 OR Rv0244c OR Rv0271c OR Rv0400c OR Rv0752c OR Rv0873 OR Rv0972c OR Rv0975c OR Rv1346 OR Rv1467c OR Rv1679 OR Rv1933c OR Rv1934c OR Rv2724c OR Rv2789c OR Rv3061c OR Rv3139 OR Rv3140 OR Rv3274c OR Rv3504 OR Rv3505 OR Rv3543c OR Rv3544c OR Rv3560c OR Rv3562 OR Rv3563 OR Rv3564 OR Rv3573c OR Rv3761c OR Rv3797 OR Rv0672 OR Rv2500c AND Rv0222 OR Rv0456c OR Rv063…	#	COA + FAD + NAD + OCTADECANOYL_COA = ACCOA + FADH2 + HEXADECANOYL_COA + NADH
R558	COA + FAD + HEXADECANOYL_COA + NAD = ACCOA + FADH2 + NADH + TETRADECANOYL_COA	0	10	Rv0131c OR Rv0154c OR Rv0215c OR Rv0231 OR Rv0244c OR Rv0271c OR Rv0400c OR Rv0752c OR Rv0873 OR Rv0972c OR Rv0975c OR Rv1346 OR Rv1467c OR Rv1679 OR Rv1933c OR Rv1934c OR Rv2724c OR Rv2789c OR Rv3061c OR Rv3139 OR Rv3140 OR Rv3274c OR Rv3504 OR Rv3505 OR Rv3543c OR Rv3544c OR Rv3560c OR Rv3562 OR Rv3563 OR Rv3564 OR Rv3573c OR Rv3761c OR Rv3797 OR Rv0672 OR Rv2500c AND Rv0222 OR Rv0456c OR Rv063…	#	COA + FAD + HEXADECANOYL_COA + NAD = ACCOA + FADH2 + NADH + TETRADECANOYL_COA
R559	COA + FAD + NAD + TETRADECANOYL_COA = ACCOA + DODECANOYL_COA + FADH2 + NADH	0	10	Rv0131c OR Rv0154c OR Rv0215c OR Rv0231 OR Rv0244c OR Rv0271c OR Rv0400c OR Rv0752c OR Rv0873 OR Rv0972c OR Rv0975c OR Rv1346 OR Rv1467c OR Rv1679 OR Rv1933c OR Rv1934c OR Rv2724c OR Rv2789c OR Rv3061c OR Rv3139 OR Rv3140 OR Rv3274c OR Rv3504 OR Rv3505 OR Rv3543c OR Rv3544c OR Rv3560c OR Rv3562 OR Rv3563 OR Rv3564 OR Rv3573c OR Rv3761c OR Rv3797 OR Rv0672 OR Rv2500c AND Rv0222 OR Rv0456c OR Rv063…	#	COA + FAD + NAD + TETRADECANOYL_COA = ACCOA + DODECANOYL_COA + FADH2 + NADH
R560	COA + DODECANOYL_COA + FAD + NAD = ACCOA + DECANOYL_COA + FADH2 + NADH	0	10	Rv0131c OR Rv0154c OR Rv0215c OR Rv0231 OR Rv0244c OR Rv0271c OR Rv0400c OR Rv0752c OR Rv0873 OR Rv0972c OR Rv0975c OR Rv1346 OR Rv1467c OR Rv1679 OR Rv1933c OR Rv1934c OR Rv2724c OR Rv2789c OR Rv3061c OR Rv3139 OR Rv3140 OR Rv3274c OR Rv3504 OR Rv3505 OR Rv3543c OR Rv3544c OR Rv3560c OR Rv3562 OR Rv3563 OR Rv3564 OR Rv3573c OR Rv3761c OR Rv3797 OR Rv0672 OR Rv2500c AND Rv0222 OR Rv0456c OR Rv063…	#	COA + DODECANOYL_COA + FAD + NAD = ACCOA + DECANOYL_COA + FADH2 + NADH
R561	COA + DECANOYL_COA + FAD + NAD = ACCOA + FADH2 + NADH + OCTANOYL_COA	0	10	Rv0131c OR Rv0154c OR Rv0215c OR Rv0231 OR Rv0244c OR Rv0271c OR Rv0400c OR Rv0752c OR Rv0873 OR Rv0972c OR Rv0975c OR Rv1346 OR Rv1467c OR Rv1679 OR Rv1933c OR Rv1934c OR Rv2724c OR Rv2789c OR Rv3061c OR Rv3139 OR Rv3140 OR Rv3274c OR Rv3504 OR Rv3505 OR Rv3543c OR Rv3544c OR Rv3560c OR Rv3562 OR Rv3563 OR Rv3564 OR Rv3573c OR Rv3761c OR Rv3797 OR Rv0672 OR Rv2500c AND Rv0222 OR Rv0456c OR Rv063…	#	COA + DECANOYL_COA + FAD + NAD = ACCOA + FADH2 + NADH + OCTANOYL_COA
R562	COA + FAD + NAD + OCTANOYL_COA = ACCOA + FADH2 + HEXANOYL_COA + NADH	0	10	Rv0131c OR Rv0154c OR Rv0215c OR Rv0231 OR Rv0244c OR Rv0271c OR Rv0400c OR Rv0752c OR Rv0873 OR Rv0972c OR Rv0975c OR Rv1346 OR Rv1467c OR Rv1679 OR Rv1933c OR Rv1934c OR Rv2724c OR Rv2789c OR Rv3061c OR Rv3139 OR Rv3140 OR Rv3274c OR Rv3504 OR Rv3505 OR Rv3543c OR Rv3544c OR Rv3560c OR Rv3562 OR Rv3563 OR Rv3564 OR Rv3573c OR Rv3761c OR Rv3797 OR Rv0672 OR Rv2500c AND Rv0222 OR Rv0456c OR Rv063…	#	COA + FAD + NAD + OCTANOYL_COA = ACCOA + FADH2 + HEXANOYL_COA + NADH
R563	COA + FAD + HEXANOYL_COA + NAD = ACCOA + BUTANOYL_COA + FADH2 + NADH	0	10	Rv0131c OR Rv0154c OR Rv0215c OR Rv0231 OR Rv0244c OR Rv0271c OR Rv0400c OR Rv0752c OR Rv0873 OR Rv0972c OR Rv0975c OR Rv1346 OR Rv1467c OR Rv1679 OR Rv1933c OR Rv1934c OR Rv2724c OR Rv2789c OR Rv3061c OR Rv3139 OR Rv3140 OR Rv3274c OR Rv3504 OR Rv3505 OR Rv3543c OR Rv3544c OR Rv3560c OR Rv3562 OR Rv3563 OR Rv3564 OR Rv3573c OR Rv3761c OR Rv3797 OR Rv0672 OR Rv2500c AND Rv0222 OR Rv0456c OR Rv063…	#	COA + FAD + HEXANOYL_COA + NAD = ACCOA + BUTANOYL_COA + FADH2 + NADH
R564	BUTANOYL_COA + COA + FAD + NAD = 2.0 ACCOA + FADH2 + NADH	0	10	Rv0131c OR Rv0154c OR Rv0215c OR Rv0231 OR Rv0244c OR Rv0271c OR Rv0400c OR Rv0752c OR Rv0873 OR Rv0972c OR Rv0975c OR Rv1346 OR Rv1467c OR Rv1679 OR Rv1933c OR Rv1934c OR Rv2724c OR Rv2789c OR Rv3061c OR Rv3139 OR Rv3140 OR Rv3274c OR Rv3504 OR Rv3505 OR Rv3543c OR Rv3544c OR Rv3560c OR Rv3562 OR Rv3563 OR Rv3564 OR Rv3573c OR Rv3761c OR Rv3797 OR Rv0672 OR Rv2500c AND Rv0222 OR Rv0456c OR Rv063…	#	BUTANOYL_COA + COA + FAD + NAD = 2.0 ACCOA + FADH2 + NADH
R565	9_OCTADECENOYL_COA + COA + FAD + NAD = 9_HEXADECENOYL_COA + ACCOA + FADH2 + NADH	0	10	Rv0131c OR Rv0154c OR Rv0215c OR Rv0231 OR Rv0244c OR Rv0271c OR Rv0400c OR Rv0752c OR Rv0873 OR Rv0972c OR Rv0975c OR Rv1346 OR Rv1467c OR Rv1679 OR Rv1933c OR Rv1934c OR Rv2724c OR Rv2789c OR Rv3061c OR Rv3139 OR Rv3140 OR Rv3274c OR Rv3504 OR Rv3505 OR Rv3543c OR Rv3544c OR Rv3560c OR Rv3562 OR Rv3563 OR Rv3564 OR Rv3573c OR Rv3761c OR Rv3797 OR Rv0672 OR Rv2500c AND Rv0222 OR Rv0456c OR Rv063…	#	9_OCTADECENOYL_COA + COA + FAD + NAD = 9_HEXADECENOYL_COA + ACCOA + FADH2 + NADH
R566	9_HEXADECENOYL_COA + COA + FAD + NAD = ACCOA + CIS_DELTA_5_TETRADECANOYL_COA + FADH2 + NADH	0	10	Rv0131c OR Rv0154c OR Rv0215c OR Rv0231 OR Rv0244c OR Rv0271c OR Rv0400c OR Rv0752c OR Rv0873 OR Rv0972c OR Rv0975c OR Rv1346 OR Rv1467c OR Rv1679 OR Rv1933c OR Rv1934c OR Rv2724c OR Rv2789c OR Rv3061c OR Rv3139 OR Rv3140 OR Rv3274c OR Rv3504 OR Rv3505 OR Rv3543c OR Rv3544c OR Rv3560c OR Rv3562 OR Rv3563 OR Rv3564 OR Rv3573c OR Rv3761c OR Rv3797 OR Rv0672 OR Rv2500c AND Rv0222 OR Rv0456c OR Rv063…	#	9_HEXADECENOYL_COA + COA + FAD + NAD = ACCOA + CIS_DELTA_5_TETRADECANOYL_COA + FADH2 + NADH
R567	CIS_DELTA_5_TETRADECANOYL_COA + COA + FAD + NAD = ACCOA + CIS_DELTA_3_DODECANOYL_COA + FADH2 + NADH	0	10	Rv0131c OR Rv0154c OR Rv0215c OR Rv0231 OR Rv0244c OR Rv0271c OR Rv0400c OR Rv0752c OR Rv0873 OR Rv0972c OR Rv0975c OR Rv1346 OR Rv1467c OR Rv1679 OR Rv1933c OR Rv1934c OR Rv2724c OR Rv2789c OR Rv3061c OR Rv3139 OR Rv3140 OR Rv3274c OR Rv3504 OR Rv3505 OR Rv3543c OR Rv3544c OR Rv3560c OR Rv3562 OR Rv3563 OR Rv3564 OR Rv3573c OR Rv3761c OR Rv3797 OR Rv0672 OR Rv2500c AND Rv0222 OR Rv0456c OR Rv063…	#	CIS_DELTA_5_TETRADECANOYL_COA + COA + FAD + NAD = ACCOA + CIS_DELTA_3_DODECANOYL_COA + FADH2 + NADH
R568	CIS_DELTA_3_DODECANOYL_COA = TRANS_DELTA_2_DODECANOYL_COA	0	10	Rv0131c OR Rv0154c OR Rv0215c OR Rv0231 OR Rv0244c OR Rv0271c OR Rv0400c OR Rv0752c OR Rv0873 OR Rv0972c OR Rv0975c OR Rv1346 OR Rv1467c OR Rv1679 OR Rv1933c OR Rv1934c OR Rv2724c OR Rv2789c OR Rv3061c OR Rv3139 OR Rv3140 OR Rv3274c OR Rv3504 OR Rv3505 OR Rv3543c OR Rv3544c OR Rv3560c OR Rv3562 OR Rv3563 OR Rv3564 OR Rv3573c OR Rv3761c OR Rv3797 OR Rv0672 OR Rv2500c AND Rv0222 OR Rv0456c OR Rv063…	#	CIS_DELTA_3_DODECANOYL_COA = TRANS_DELTA_2_DODECANOYL_COA
R569	TRANS_DELTA_2_DODECANOYL_COA = TRANS_DELTA_2_HYDROXY_DODECANOYL_COA	0	10	Rv0131c OR Rv0154c OR Rv0215c OR Rv0231 OR Rv0244c OR Rv0271c OR Rv0400c OR Rv0752c OR Rv0873 OR Rv0972c OR Rv0975c OR Rv1346 OR Rv1467c OR Rv1679 OR Rv1933c OR Rv1934c OR Rv2724c OR Rv2789c OR Rv3061c OR Rv3139 OR Rv3140 OR Rv3274c OR Rv3504 OR Rv3505 OR Rv3543c OR Rv3544c OR Rv3560c OR Rv3562 OR Rv3563 OR Rv3564 OR Rv3573c OR Rv3761c OR Rv3797 OR Rv0672 OR Rv2500c AND Rv0222 OR Rv0456c OR Rv063…	#	TRANS_DELTA_2_DODECANOYL_COA = TRANS_DELTA_2_HYDROXY_DODECANOYL_COA
R570	NAD + TRANS_DELTA_2_HYDROXY_DODECANOYL_COA = DODECANOYL_COA + NADH	0	10	Rv0131c OR Rv0154c OR Rv0215c OR Rv0231 OR Rv0244c OR Rv0271c OR Rv0400c OR Rv0752c OR Rv0873 OR Rv0972c OR Rv0975c OR Rv1346 OR Rv1467c OR Rv1679 OR Rv1933c OR Rv1934c OR Rv2724c OR Rv2789c OR Rv3061c OR Rv3139 OR Rv3140 OR Rv3274c OR Rv3504 OR Rv3505 OR Rv3543c OR Rv3544c OR Rv3560c OR Rv3562 OR Rv3563 OR Rv3564 OR Rv3573c OR Rv3761c OR Rv3797 OR Rv0672 OR Rv2500c AND Rv0222 OR Rv0456c OR Rv063…	#	NAD + TRANS_DELTA_2_HYDROXY_DODECANOYL_COA = DODECANOYL_COA + NADH
R571	PA = DAG + PI	0	10		#	PA = DAG + PI
R571b	1.16 TAGcat = TAGbio	-10	10		#	1.16 TAGcat = TAGbio
R572	TAGcat = 0.1 9_OCTADECENOATE + DAG + 0.1 EICOSANOATE + 0.1 HEXACOSANOATE + 0.2 HEXADECANOATE + 0.1 NONADECANOATE + 0.1 OCTADECANOATE + 0.1 PENTADECANOATE + 0.1 TETRACOSANOATE	0	10	Rv3097c	#	TAGcat = 0.1 9_OCTADECENOATE + DAG + 0.1 EICOSANOATE + 0.1 HEXACOSANOATE + 0.2 HEXADECANOATE + 0.1 NONADECANOATE + 0.1 OCTADECANOATE + 0.1 PENTADECANOATE + 0.1 TETRACOSANOATE
R573	DAG = 0.1 9_OCTADECENOATE + 0.1 EICOSANOATE + 0.1 HEXACOSANOATE + 0.2 HEXADECANOATE + MAG + 0.1 NONADECANOATE + 0.1 OCTADECANOATE + 0.1 PENTADECANOATE + 0.1 TETRACOSANOATE	0	10		#	DAG = 0.1 9_OCTADECENOATE + 0.1 EICOSANOATE + 0.1 HEXACOSANOATE + 0.2 HEXADECANOATE + MAG + 0.1 NONADECANOATE + 0.1 OCTADECANOATE + 0.1 PENTADECANOATE + 0.1 TETRACOSANOATE
R574	MAG = 0.1 9_OCTADECENOATE + 0.1 EICOSANOATE + GL + 0.1 HEXACOSANOATE + 0.2 HEXADECANOATE + 0.1 NONADECANOATE + 0.1 OCTADECANOATE + 0.1 PENTADECANOATE + 0.1 TETRACOSANOATE	0	10	Rv0183 OR Rv2854	#	MAG = 0.1 9_OCTADECENOATE + 0.1 EICOSANOATE + GL + 0.1 HEXACOSANOATE + 0.2 HEXADECANOATE + 0.1 NONADECANOATE + 0.1 OCTADECANOATE + 0.1 PENTADECANOATE + 0.1 TETRACOSANOATE
R575	COA + FAD + NAD + NONADECANOYL_COA = ACCOA + FADH2 + HEPTADECANOYL_COA + NADH	0	10	Rv0131c OR Rv0154c OR Rv0215c OR Rv0231 OR Rv0244c OR Rv0271c OR Rv0400c OR Rv0752c OR Rv0873 OR Rv0972c OR Rv0975c OR Rv1346 OR Rv1467c OR Rv1679 OR Rv1933c OR Rv1934c OR Rv2724c OR Rv2789c OR Rv3061c OR Rv3139 OR Rv3140 OR Rv3274c OR Rv3504 OR Rv3505 OR Rv3543c OR Rv3544c OR Rv3560c OR Rv3562 OR Rv3563 OR Rv3564 OR Rv3573c OR Rv3761c OR Rv3797 OR Rv0672 OR Rv2500c AND Rv0222 OR Rv0456c OR Rv063…	#	COA + FAD + NAD + NONADECANOYL_COA = ACCOA + FADH2 + HEPTADECANOYL_COA + NADH
R576	COA + FAD + HEPTADECANOYL_COA + NAD = ACCOA + FADH2 + NADH + PENTADECANOYL_COA	0	10	Rv0131c OR Rv0154c OR Rv0215c OR Rv0231 OR Rv0244c OR Rv0271c OR Rv0400c OR Rv0752c OR Rv0873 OR Rv0972c OR Rv0975c OR Rv1346 OR Rv1467c OR Rv1679 OR Rv1933c OR Rv1934c OR Rv2724c OR Rv2789c OR Rv3061c OR Rv3139 OR Rv3140 OR Rv3274c OR Rv3504 OR Rv3505 OR Rv3543c OR Rv3544c OR Rv3560c OR Rv3562 OR Rv3563 OR Rv3564 OR Rv3573c OR Rv3761c OR Rv3797 OR Rv0672 OR Rv2500c AND Rv0222 OR Rv0456c OR Rv063…	#	COA + FAD + HEPTADECANOYL_COA + NAD = ACCOA + FADH2 + NADH + PENTADECANOYL_COA
R577	COA + FAD + NAD + PENTADECANOYL_COA = ACCOA + FADH2 + NADH + TRIDECANOYL_COA	0	10	Rv0131c OR Rv0154c OR Rv0215c OR Rv0231 OR Rv0244c OR Rv0271c OR Rv0400c OR Rv0752c OR Rv0873 OR Rv0972c OR Rv0975c OR Rv1346 OR Rv1467c OR Rv1679 OR Rv1933c OR Rv1934c OR Rv2724c OR Rv2789c OR Rv3061c OR Rv3139 OR Rv3140 OR Rv3274c OR Rv3504 OR Rv3505 OR Rv3543c OR Rv3544c OR Rv3560c OR Rv3562 OR Rv3563 OR Rv3564 OR Rv3573c OR Rv3761c OR Rv3797 OR Rv0672 OR Rv2500c AND Rv0222 OR Rv0456c OR Rv063…	#	COA + FAD + NAD + PENTADECANOYL_COA = ACCOA + FADH2 + NADH + TRIDECANOYL_COA
R578	COA + FAD + NAD + TRIDECANOYL_COA = ACCOA + FADH2 + NADH + UNDECANOYL_COA	0	10	Rv0131c OR Rv0154c OR Rv0215c OR Rv0231 OR Rv0244c OR Rv0271c OR Rv0400c OR Rv0752c OR Rv0873 OR Rv0972c OR Rv0975c OR Rv1346 OR Rv1467c OR Rv1679 OR Rv1933c OR Rv1934c OR Rv2724c OR Rv2789c OR Rv3061c OR Rv3139 OR Rv3140 OR Rv3274c OR Rv3504 OR Rv3505 OR Rv3543c OR Rv3544c OR Rv3560c OR Rv3562 OR Rv3563 OR Rv3564 OR Rv3573c OR Rv3761c OR Rv3797 OR Rv0672 OR Rv2500c AND Rv0222 OR Rv0456c OR Rv063…	#	COA + FAD + NAD + TRIDECANOYL_COA = ACCOA + FADH2 + NADH + UNDECANOYL_COA
R579	COA + FAD + NAD + UNDECANOYL_COA = ACCOA + FADH2 + NADH + NONANOYL_COA	0	10	Rv0131c OR Rv0154c OR Rv0215c OR Rv0231 OR Rv0244c OR Rv0271c OR Rv0400c OR Rv0752c OR Rv0873 OR Rv0972c OR Rv0975c OR Rv1346 OR Rv1467c OR Rv1679 OR Rv1933c OR Rv1934c OR Rv2724c OR Rv2789c OR Rv3061c OR Rv3139 OR Rv3140 OR Rv3274c OR Rv3504 OR Rv3505 OR Rv3543c OR Rv3544c OR Rv3560c OR Rv3562 OR Rv3563 OR Rv3564 OR Rv3573c OR Rv3761c OR Rv3797 OR Rv0672 OR Rv2500c AND Rv0222 OR Rv0456c OR Rv063…	#	COA + FAD + NAD + UNDECANOYL_COA = ACCOA + FADH2 + NADH + NONANOYL_COA
R580	COA + FAD + NAD + NONANOYL_COA = ACCOA + FADH2 + HEPTANOYL_COA + NADH	0	10	Rv0131c OR Rv0154c OR Rv0215c OR Rv0231 OR Rv0244c OR Rv0271c OR Rv0400c OR Rv0752c OR Rv0873 OR Rv0972c OR Rv0975c OR Rv1346 OR Rv1467c OR Rv1679 OR Rv1933c OR Rv1934c OR Rv2724c OR Rv2789c OR Rv3061c OR Rv3139 OR Rv3140 OR Rv3274c OR Rv3504 OR Rv3505 OR Rv3543c OR Rv3544c OR Rv3560c OR Rv3562 OR Rv3563 OR Rv3564 OR Rv3573c OR Rv3761c OR Rv3797 OR Rv0672 OR Rv2500c AND Rv0222 OR Rv0456c OR Rv063…	#	COA + FAD + NAD + NONANOYL_COA = ACCOA + FADH2 + HEPTANOYL_COA + NADH
R581	COA + FAD + HEPTANOYL_COA + NAD = ACCOA + FADH2 + NADH + PENTANOYL_COA	0	10	Rv0131c OR Rv0154c OR Rv0215c OR Rv0231 OR Rv0244c OR Rv0271c OR Rv0400c OR Rv0752c OR Rv0873 OR Rv0972c OR Rv0975c OR Rv1346 OR Rv1467c OR Rv1679 OR Rv1933c OR Rv1934c OR Rv2724c OR Rv2789c OR Rv3061c OR Rv3139 OR Rv3140 OR Rv3274c OR Rv3504 OR Rv3505 OR Rv3543c OR Rv3544c OR Rv3560c OR Rv3562 OR Rv3563 OR Rv3564 OR Rv3573c OR Rv3761c OR Rv3797 OR Rv0672 OR Rv2500c AND Rv0222 OR Rv0456c OR Rv063…	#	COA + FAD + HEPTANOYL_COA + NAD = ACCOA + FADH2 + NADH + PENTANOYL_COA
R582	COA + FAD + NAD + PENTANOYL_COA = ACCOA + FADH2 + NADH + PROPIONYLCOA	0	10	Rv0131c OR Rv0154c OR Rv0215c OR Rv0231 OR Rv0244c OR Rv0271c OR Rv0400c OR Rv0752c OR Rv0873 OR Rv0972c OR Rv0975c OR Rv1346 OR Rv1467c OR Rv1679 OR Rv1933c OR Rv1934c OR Rv2724c OR Rv2789c OR Rv3061c OR Rv3139 OR Rv3140 OR Rv3274c OR Rv3504 OR Rv3505 OR Rv3543c OR Rv3544c OR Rv3560c OR Rv3562 OR Rv3563 OR Rv3564 OR Rv3573c OR Rv3761c OR Rv3797 OR Rv0672 OR Rv2500c AND Rv0222 OR Rv0456c OR Rv063…	#	COA + FAD + NAD + PENTANOYL_COA = ACCOA + FADH2 + NADH + PROPIONYLCOA
R583	0.1 9_HEXADECENOYL_COA + 0.1 9_OCTADECENOYL_COA + 0.1 EICOSANOYL_COA + GL3P + 0.1 HEXACOSANOYL_COA + 0.2 HEXADECANOYL_COA + 0.1 NONADECANOYL_COA + 0.1 OCTADECANOYL_COA + 0.1 PENTADECANOYL_COA + 0.1 TETRACOSANOYL_COA = AGL3P + COA	0	10	Rv2482c OR Rv1551	#	0.1 9_HEXADECENOYL_COA + 0.1 9_OCTADECENOYL_COA + 0.1 EICOSANOYL_COA + GL3P + 0.1 HEXACOSANOYL_COA + 0.2 HEXADECANOYL_COA + 0.1 NONADECANOYL_COA + 0.1 OCTADECANOYL_COA + 0.1 PENTADECANOYL_COA + 0.1 TETRACOSANOYL_COA = AGL3P + COA
R587	0.1 9_HEXADECENOYL_COA + 0.1 9_OCTADECENOYL_COA + AGL3P + 0.1 EICOSANOYL_COA + 0.1 HEXACOSANOYL_COA + 0.2 HEXADECANOYL_COA + 0.1 NONADECANOYL_COA + 0.1 OCTADECANOYL_COA + 0.1 PENTADECANOYL_COA + 0.1 TETRACOSANOYL_COA = COA + PA	0	10	Rv2483c OR Rv2182c	#	0.1 9_HEXADECENOYL_COA + 0.1 9_OCTADECENOYL_COA + AGL3P + 0.1 EICOSANOYL_COA + 0.1 HEXACOSANOYL_COA + 0.2 HEXADECANOYL_COA + 0.1 NONADECANOYL_COA + 0.1 OCTADECANOYL_COA + 0.1 PENTADECANOYL_COA + 0.1 TETRACOSANOYL_COA = COA + PA
R588	CTP + PA = CDPDG + PPI	-10	10	Rv2881c	#	CTP + PA = CDPDG + PPI
R589	CDPDG + SER = CMP + PS	-10	10	Rv0436c	#	CDPDG + SER = CMP + PS
R590	PHOSPHATIDYLCHOLINE = DAG	0	10	Rv0217c OR Rv0220 OR Rv0646c OR Rv1076 OR Rv1104 OR Rv1105 OR Rv1399c OR Rv1400c OR Rv1426c OR Rv1497 OR Rv1755c OR Rv1900c OR Rv1923 OR Rv2045c OR Rv2284 OR Rv2349c OR Rv2350c OR Rv2351c OR Rv2385 OR Rv2463 OR Rv2485c OR Rv2970c OR Rv3084 OR Rv3176c OR Rv3203 OR Rv3487c OR Rv3775	#	PHOSPHATIDYLCHOLINE = DAG
R591	DHAP + NADH = GL3P + NAD	-10	10	Rv2982c OR Rv0564	#	DHAP + NADH = GL3P + NAD
R592	CDPDG + GL3P = CMP + PGP	-10	10	Rv2746c	#	CDPDG + GL3P = CMP + PGP
R593	PGP = PG + PI	0	10		#	PGP = PG + PI
R594	GL3P + HEXADECANOYL_ACP = A160GL3P + ACP	0	10	Rv2482c	#	GL3P + HEXADECANOYL_ACP = A160GL3P + ACP
R595	A160GL3P + TUBERCULOSTEROYL_ACP = ACP + PA_TBA	0	10	Rv2483c OR Rv2182c	#	A160GL3P + TUBERCULOSTEROYL_ACP = ACP + PA_TBA
R596	CTP + PA_TBA = CDPDAG_TBA + PPI	0	10	Rv2881c	#	CTP + PA_TBA = CDPDAG_TBA + PPI
R597	CDPDAG_TBA + MI = CMP + PI_TBA	0	10	Rv2612c	#	CDPDAG_TBA + MI = CMP + PI_TBA
R598	GDPMAN + PI_TBA = AC1PIM1 + GDP	0	10	Rv2610c	#	GDPMAN + PI_TBA = AC1PIM1 + GDP
R599	AC1PIM1 + HEXADECANOYL_ACP = AC2PIM1 + ACP	-10	10	Rv2611c	#	AC1PIM1 + HEXADECANOYL_ACP = AC2PIM1 + ACP
R600	AC2PIM1 + HEXADECANOYL_ACP = AC3PIM1 + ACP	-10	10	Rv2611c	#	AC2PIM1 + HEXADECANOYL_ACP = AC3PIM1 + ACP
R601	AC3PIM1 + HEXADECANOYL_ACP = AC4PIM1 + ACP	-10	10	Rv2611c	#	AC3PIM1 + HEXADECANOYL_ACP = AC4PIM1 + ACP
R602	AC1PIM1 + GDPMAN = AC1PIM2 + GDP	0	10	Rv0557	#	AC1PIM1 + GDPMAN = AC1PIM2 + GDP
R603	AC1PIM2 + HEXADECANOYL_ACP = AC2PIM2 + ACP	-10	10	Rv2611c	#	AC1PIM2 + HEXADECANOYL_ACP = AC2PIM2 + ACP
R604	AC2PIM2 + HEXADECANOYL_ACP = AC3PIM2 + ACP	-10	10	Rv2611c	#	AC2PIM2 + HEXADECANOYL_ACP = AC3PIM2 + ACP
R605	AC3PIM2 + HEXADECANOYL_ACP = AC4PIM2 + ACP	-10	10	Rv2611c	#	AC3PIM2 + HEXADECANOYL_ACP = AC4PIM2 + ACP
R606	AC1PIM2 + GDPMAN = AC1PIM3 + GDP	0	10		#	AC1PIM2 + GDPMAN = AC1PIM3 + GDP
R607	AC1PIM3 + HEXADECANOYL_ACP = AC2PIM3 + ACP	-10	10	Rv2611c	#	AC1PIM3 + HEXADECANOYL_ACP = AC2PIM3 + ACP
R608	AC2PIM3 + HEXADECANOYL_ACP = AC3PIM3 + ACP	-10	10	Rv2611c	#	AC2PIM3 + HEXADECANOYL_ACP = AC3PIM3 + ACP
R609	AC3PIM3 + HEXADECANOYL_ACP = AC4PIM3 + ACP	-10	10	Rv2611c	#	AC3PIM3 + HEXADECANOYL_ACP = AC4PIM3 + ACP
R610	AC3PIM3 + PPM = AC3PIM4 + DPP	0	10		#	AC3PIM3 + PPM = AC3PIM4 + DPP
R611	AC3PIM4 + PPM = AC3PIM5 + DPP	0	10		#	AC3PIM4 + PPM = AC3PIM5 + DPP
R612	AC3PIM5 + HEXADECANOYL_ACP = AC4PIM5 + ACP	-10	10	Rv2611c	#	AC3PIM5 + HEXADECANOYL_ACP = AC4PIM5 + ACP
R613	AC4PIM5 + PPM = AC4PIM6 + DPP	0	10	Rv1500	#	AC4PIM5 + PPM = AC4PIM6 + DPP
R614	AC4PIM6 + PPM = AC4PIM7 + DPP	0	10		#	AC4PIM6 + PPM = AC4PIM7 + DPP
R615	HEXANOYL_COA + 5.0 MALCOA + 20.0 NADPH + 5.0 SMMALONYLCOA = 10.0 CO2 + 11.0 COA + 20.0 NADP + PENTA_METHYL_TRICONTANOYL	0	10	Rv2048c	#	HEXANOYL_COA + 5.0 MALCOA + 20.0 NADPH + 5.0 SMMALONYLCOA = 10.0 CO2 + 11.0 COA + 20.0 NADP + PENTA_METHYL_TRICONTANOYL
R616	COA + PENTA_METHYL_TRICONTANOYL = PENTA_METHYL_TRICONTANOYL_COA	0	10	Rv2048c	#	COA + PENTA_METHYL_TRICONTANOYL = PENTA_METHYL_TRICONTANOYL_COA
R617	ATP + PENTA_METHYL_TRICONTANOYL_COA = ADP + PHOSPHO_PENTA_METHYL_TRICONTANOYL_COA	0	10		#	ATP + PENTA_METHYL_TRICONTANOYL_COA = ADP + PHOSPHO_PENTA_METHYL_TRICONTANOYL_COA
R618	ACP + MALCOA = COA + MALACP	0	10	Rv2243 OR Rv0649 AND Rv2244	#	ACP + MALCOA = COA + MALACP
R619	ACP + SMMALONYLCOA = COA + RMMALONYLACP	0	10	Rv2243 OR Rv0649 AND Rv2244	#	ACP + SMMALONYLCOA = COA + RMMALONYLACP
R620	EICOSANOYL_COA + MALACP = BETA_KETO_C22_ACYL_ACP + CO2 + COA	0	10	Rv0533c	#	EICOSANOYL_COA + MALACP = BETA_KETO_C22_ACYL_ACP + CO2 + COA
R621	BETA_KETO_C22_ACYL_ACP + NADPH = D_3_HYDROXY_C22_ACYL_ACP + NADP	0	10	Rv1483 OR Rv1350 OR Rv2002 OR Rv0242c OR Rv2766c	#	BETA_KETO_C22_ACYL_ACP + NADPH = D_3_HYDROXY_C22_ACYL_ACP + NADP
R622	D_3_HYDROXY_C22_ACYL_ACP = TRANS_DELTA_2_ENOYL_C22_ACYL_ACP	0	10	Rv0635 AND Rv0636 OR Rv0636 AND Rv0637	#	D_3_HYDROXY_C22_ACYL_ACP = TRANS_DELTA_2_ENOYL_C22_ACYL_ACP
R623	TRANS_DELTA_2_ENOYL_C22_ACYL_ACP = CIS_DELTA_3_ENOYL_C22_ACYL_ACP	0	10	Rv1142 OR Rv1141c	#	TRANS_DELTA_2_ENOYL_C22_ACYL_ACP = CIS_DELTA_3_ENOYL_C22_ACYL_ACP
R624	CIS_DELTA_3_ENOYL_C22_ACYL_ACP + 5.0 MALACP + 10.0 NADPH = 5.0 ACP + CIS_DELTA_13_ENOYL_C32_ACYL_ACP + 5.0 CO2 + 10.0 NADP	0	10	Rv2245 OR Rv2246 AND Rv1483 OR Rv1350 OR Rv2002 OR Rv0242c OR Rv2766c AND Rv0098 OR Rv0130 AND Rv1484	#	CIS_DELTA_3_ENOYL_C22_ACYL_ACP + 5.0 MALACP + 10.0 NADPH = 5.0 ACP + CIS_DELTA_13_ENOYL_C32_ACYL_ACP + 5.0 CO2 + 10.0 NADP
R625	CIS_DELTA_13_ENOYL_C32_ACYL_ACP + MALACP + NADPH = ACP + CIS_DELTA_2_3,15_ENOYL_C34_ACYL_ACP + CO2 + NADP	0	10	Rv2245 OR Rv2246 AND Rv1483 OR Rv1350 OR Rv2002 OR Rv0242c OR Rv2766c AND Rv0098 OR Rv0130 AND Rv1142c OR Rv1141c	#	CIS_DELTA_13_ENOYL_C32_ACYL_ACP + MALACP + NADPH = ACP + CIS_DELTA_2_3,15_ENOYL_C34_ACYL_ACP + CO2 + NADP
R626	CIS_DELTA_2_3,15_ENOYL_C34_ACYL_ACP + 8.0 MALACP + 16.0 NADPH = 8.0 ACP + CIS_DELTA_2_19,31_ENOYL_C50_ACYL_ACP + 8.0 CO2 + 16.0 NADP	0	10	Rv2245 OR Rv2246 AND Rv1483 OR Rv1350 OR Rv2002 OR Rv0242c OR Rv2766c AND Rv0098 OR Rv0130 AND Rv1484	#	CIS_DELTA_2_3,15_ENOYL_C34_ACYL_ACP + 8.0 MALACP + 16.0 NADPH = 8.0 ACP + CIS_DELTA_2_19,31_ENOYL_C50_ACYL_ACP + 8.0 CO2 + 16.0 NADP
R627	CIS_DELTA_2_19,31_ENOYL_C50_ACYL_ACP + 2.0 NADP + 2.0 SAM = CYCLOPROPYL_MEROACYL_ACP + 2.0 NADPH + 2.0 SAH	0	10	Rv0643c AND Rv0503c	#	CIS_DELTA_2_19,31_ENOYL_C50_ACYL_ACP + 2.0 NADP + 2.0 SAM = CYCLOPROPYL_MEROACYL_ACP + 2.0 NADPH + 2.0 SAH
R628	CIS_DELTA_3_ENOYL_C22_ACYL_ACP + 8.0 MALACP + 16.0 NADPH = 8.0 ACP + CIS_DELTA_19_ENOYL_C38_ACYL_ACP + 8.0 CO2 + 16.0 NADP	0	10	Rv2245 OR Rv2246 AND Rv1483 OR Rv1350 OR Rv2002 OR Rv0242c OR Rv2766c AND Rv0098 OR Rv0130 AND Rv1484	#	CIS_DELTA_3_ENOYL_C22_ACYL_ACP + 8.0 MALACP + 16.0 NADPH = 8.0 ACP + CIS_DELTA_19_ENOYL_C38_ACYL_ACP + 8.0 CO2 + 16.0 NADP
R629	CIS_DELTA_19_ENOYL_C38_ACYL_ACP + MALACP + NADPH = ACP + CIS_DELTA_2_3,21_ENOYL_C40_ACYL_ACP + CO2 + NADP	0	10	Rv2245 OR Rv2246 AND Rv1483 OR Rv1350 OR Rv2002 OR Rv0242c OR Rv2766c AND Rv0098 OR Rv0130 AND Rv1142c OR Rv1141c	#	CIS_DELTA_19_ENOYL_C38_ACYL_ACP + MALACP + NADPH = ACP + CIS_DELTA_2_3,21_ENOYL_C40_ACYL_ACP + CO2 + NADP
R630	CIS_DELTA_2_3,21_ENOYL_C40_ACYL_ACP + 8.0 MALACP + 16.0 NADPH = 8.0 ACP + CIS_DELTA_2_19,37_ENOYL_C56_ACYL_ACP + 8.0 CO2 + 16.0 NADP	0	10	Rv2245 OR Rv2246 AND Rv1483 OR Rv1350 OR Rv2002 OR Rv0242c OR Rv2766c AND Rv0098 OR Rv0130 AND Rv1484	#	CIS_DELTA_2_3,21_ENOYL_C40_ACYL_ACP + 8.0 MALACP + 16.0 NADPH = 8.0 ACP + CIS_DELTA_2_19,37_ENOYL_C56_ACYL_ACP + 8.0 CO2 + 16.0 NADP
R631	CIS_DELTA_2_19,37_ENOYL_C56_ACYL_ACP + SAM = CIS_DELTA_37_ENOYL_METHY_HYDROXY_C56_ACYL_ACP + SAH	0	10	Rv0642c	#	CIS_DELTA_2_19,37_ENOYL_C56_ACYL_ACP + SAM = CIS_DELTA_37_ENOYL_METHY_HYDROXY_C56_ACYL_ACP + SAH
R632	CIS_DELTA_37_ENOYL_METHY_HYDROXY_C56_ACYL_ACP + 2.0 NADP + 2.0 SAM = CIS_METHOXY_MEROACYL_ACP + 2.0 NADPH + 2.0 SAH	0	10	Rv0643c AND Rv0644c	#	CIS_DELTA_37_ENOYL_METHY_HYDROXY_C56_ACYL_ACP + 2.0 NADP + 2.0 SAM = CIS_METHOXY_MEROACYL_ACP + 2.0 NADPH + 2.0 SAH
R633	CIS_DELTA_37_ENOYL_METHY_HYDROXY_C56_ACYL_ACP + 2.0 NADP + SAM = CIS_KETO_MEROACYL_ACP + 2.0 NADPH + SAH	0	10	Rv0644c	#	CIS_DELTA_37_ENOYL_METHY_HYDROXY_C56_ACYL_ACP + 2.0 NADP + SAM = CIS_KETO_MEROACYL_ACP + 2.0 NADPH + SAH
R634	CIS_DELTA_37_ENOYL_METHY_HYDROXY_C56_ACYL_ACP + NADP + SAM = CIS_DELTA_37_ENOYL_DIMETHY_HYDROXY_C56_ACYL_ACP + NADPH + SAH	0	10	Rv0645c	#	CIS_DELTA_37_ENOYL_METHY_HYDROXY_C56_ACYL_ACP + NADP + SAM = CIS_DELTA_37_ENOYL_DIMETHY_HYDROXY_C56_ACYL_ACP + NADPH + SAH
R635	CIS_DELTA_37_ENOYL_DIMETHY_HYDROXY_C56_ACYL_ACP + 2.0 NADP + 2.0 SAM = 2.0 NADPH + 2.0 SAH + TRANS_METHOXY_MEROACYL_ACP	0	10	Rv0643c AND Rv0503c	#	CIS_DELTA_37_ENOYL_DIMETHY_HYDROXY_C56_ACYL_ACP + 2.0 NADP + 2.0 SAM = 2.0 NADPH + 2.0 SAH + TRANS_METHOXY_MEROACYL_ACP
R636	CIS_DELTA_37_ENOYL_DIMETHY_HYDROXY_C56_ACYL_ACP + 2.0 NADP + SAM = 2.0 NADPH + SAH + TRANS_KETO_MEROACYL_ACP	0	10	Rv0503c	#	CIS_DELTA_37_ENOYL_DIMETHY_HYDROXY_C56_ACYL_ACP + 2.0 NADP + SAM = 2.0 NADPH + SAH + TRANS_KETO_MEROACYL_ACP
R637	ATP + 0.05 CIS_KETO_MEROACYL_ACP + 0.05 CIS_METHOXY_MEROACYL_ACP + 0.8 CYCLOPROPYL_MEROACYL_ACP + 0.05 TRANS_KETO_MEROACYL_ACP + 0.05 TRANS_METHOXY_MEROACYL_ACP = ACP + MEROACYL_AMP + PI	0	10	Rv3801c	#	ATP + 0.05 CIS_KETO_MEROACYL_ACP + 0.05 CIS_METHOXY_MEROACYL_ACP + 0.8 CYCLOPROPYL_MEROACYL_ACP + 0.05 TRANS_KETO_MEROACYL_ACP + 0.05 TRANS_METHOXY_MEROACYL_ACP = ACP + MEROACYL_AMP + PI
R638	HEXACOSANOYL_COA_CO2 + MEROACYL_AMP = AMP + C78_3_OXY_MYCOLATE_ENZ + CO2 + COA	0	10	Rv3800c	#	HEXACOSANOYL_COA_CO2 + MEROACYL_AMP = AMP + C78_3_OXY_MYCOLATE_ENZ + CO2 + COA
R639	C78_3_OXY_MYCOLATE_ENZ + NADPH = C78MYCOLATE_ENZ	0	10		#	C78_3_OXY_MYCOLATE_ENZ + NADPH = C78MYCOLATE_ENZ
R640	C78MYCOLATE_ENZ + PPM = C78MYCOLATE_PP	0	10	Rv3802c	#	C78MYCOLATE_ENZ + PPM = C78MYCOLATE_PP
R641	C78MYCOLATE_PP + TRE6P = PPM + TREHALOSEMONOMYCOLATE_P	0	10	Rv1288 OR Rv0519c OR Rv0774c	#	C78MYCOLATE_PP + TRE6P = PPM + TREHALOSEMONOMYCOLATE_P
R642	TREHALOSEMONOMYCOLATE_P = PI + TREHALOSEMONOMYCOLATE(CY)	0	10	Rv3400 OR Rv2006	#	TREHALOSEMONOMYCOLATE_P = PI + TREHALOSEMONOMYCOLATE(CY)
R643	COA = MAS	0	10		#	COA = MAS
R644	0.25 DOCOSANOYL_ACP + 0.25 EICOSANOYL_ACP + MAS + 0.25 OCTACOSANOYL_ACP + 0.25 TETRACOSANOYL_ACP = ACP + ACYL_MAS	0	10	Rv2941	#	0.25 DOCOSANOYL_ACP + 0.25 EICOSANOYL_ACP + MAS + 0.25 OCTACOSANOYL_ACP + 0.25 TETRACOSANOYL_ACP = ACP + ACYL_MAS
R645	ACYL_MAS + 8.0 NADPH + 4.0 SMMALONYLCOA = 4.0 CO2 + 4.0 COA + MYCOCEROSOYL_MAS + 8.0 NADP	0	10	Rv2940c	#	ACYL_MAS + 8.0 NADPH + 4.0 SMMALONYLCOA = 4.0 CO2 + 4.0 COA + MYCOCEROSOYL_MAS + 8.0 NADP
R646	HEXADECANOYL_COA + MAS = COA + HEXADECANOYL_MAS	0	10	Rv2940c	#	HEXADECANOYL_COA + MAS = COA + HEXADECANOYL_MAS
R647	HEXADECANOYL_MAS + 6 SMMALONYLCOA + 12 NADPH = PTHIOCERANOYL_COA + 12 NADP + 6 CO2 + 5 COA + MAS	0	10	RV3825c	#	HEXADECANOYL_MAS + 6 SMMALONYLCOA + 12 NADPH = PTHIOCERANOYL_COA + 12 NADP + 6 CO2 + 5 COA + MAS
R648	HEXADECANOYL_MAS + 8 SMMALONYLCOA + 15 NADPH = HYDROXYPHTHIOCERANOYL_COA + 15 NADP + 8 CO2 + 7 COA + MAS	0	10	RV3825c	#	HEXADECANOYL_MAS + 8 SMMALONYLCOA + 15 NADPH = HYDROXYPHTHIOCERANOYL_COA + 15 NADP + 8 CO2 + 7 COA + MAS
R649	HEXADECANOYL_ACP + 2.0 NADPH + SMMALONYLCOA = CO2 + COA + 2.0 NADP + TUBERCULOSTEROYL_ACP	0	10	Rv2940c	#	HEXADECANOYL_ACP + 2.0 NADPH + SMMALONYLCOA = CO2 + COA + 2.0 NADP + TUBERCULOSTEROYL_ACP
R650	CHOR = HBA + PYR	0	10	Rv2949c	#	CHOR = HBA + PYR
R651	ATP + DOCOSANOYL_COA + 3.0 MALCOA + 5.0 NADPH + 2.0 SMMALONYLCOA = AMP + 5.0 CO2 + 5.0 NADP + PHTHIODIOLONE_A + PPI	0	10	Rv2931 AND Rv2932 AND Rv2933 AND Rv2934 AND Rv2935	#	ATP + DOCOSANOYL_COA + 3.0 MALCOA + 5.0 NADPH + 2.0 SMMALONYLCOA = AMP + 5.0 CO2 + 5.0 NADP + PHTHIODIOLONE_A + PPI
R652	NADPH + PHTHIODIOLONE_A = NADP + PTT	0	10	Rv2951c	#	NADPH + PHTHIODIOLONE_A = NADP + PTT
R653	PTT + SAM = PTC + SAH	0	10	Rv2952	#	PTT + SAM = PTC + SAH
R654	2.0 MYCOCEROSOYL_MAS + PTC = DIM_CYTO + 2.0 MAS	0	10	Rv2939	#	2.0 MYCOCEROSOYL_MAS + PTC = DIM_CYTO + 2.0 MAS
R655	ATP + HBA + 8.0 MALCOA + 16.0 NADPH = AMP + 9.0 CO2 + 7.0 COA + PHPAA_COA + PPI	0	10	Rv2947c AND Rv2946c	#	ATP + HBA + 8.0 MALCOA + 16.0 NADPH = AMP + 9.0 CO2 + 7.0 COA + PHPAA_COA + PPI
R656	3.0 MALCOA + PHPAA_COA + 2.0 SMMALONYLCOA = 5.0 CO2 + 5.0 COA + PHENOLPHTHIODIOLONE_A	0	10	Rv2931 AND Rv2932 AND Rv2933 AND Rv2934 AND Rv2935 AND Rv2930 AND Rv2941 AND Rv1661	#	3.0 MALCOA + PHPAA_COA + 2.0 SMMALONYLCOA = 5.0 CO2 + 5.0 COA + PHENOLPHTHIODIOLONE_A
R657	NADPH + PHENOLPHTHIODIOLONE_A = NADP + PPTT	0	10	Rv2951c	#	NADPH + PHENOLPHTHIODIOLONE_A = NADP + PPTT
R658	PPTT + SAM = PPTC + SAH	0	10	Rv2952	#	PPTT + SAM = PPTC + SAH
R659	2.0 MYCOCEROSOYL_MAS + PPTC = 2.0 MAS + PHDIM_CYTO	0	10	Rv2939	#	2.0 MYCOCEROSOYL_MAS + PPTC = 2.0 MAS + PHDIM_CYTO
R660	PHDIM_CYTO = PHDIM	0	10	Rv2942 AND RV2936 AND Rv2937 AND Rv2938	#	PHDIM_CYTO = PHDIM
R661	DTDPRHAM + PHDIM = DTDP + PHDIMRHAM1	0	10	Rv2962c	#	DTDPRHAM + PHDIM = DTDP + PHDIMRHAM1
R662	DTDPRHAM + PHDIMRHAM1 = DTDP + PHDIMRHAM2	0	10	Rv2958c	#	DTDPRHAM + PHDIMRHAM1 = DTDP + PHDIMRHAM2
R663	PHDIMRHAM2 + SAM = MYCOSIDE_B + SAH	0	10	Rv2959c	#	PHDIMRHAM2 + SAM = MYCOSIDE_B + SAH
R664	1 HBA + 1 DTDPRHAM = 1 HBARHAM1 + 1 DTDP	0	10	Rv2962c	#	1 HBA + 1 DTDPRHAM = 1 HBARHAM1 + 1 DTDP
R665	1 HBA + 1 DTDPRHAM = 1 HBARHAM2 + 1 DTDP	0	10	Rv2958c	#	1 HBA + 1 DTDPRHAM = 1 HBARHAM2 + 1 DTDP
R666	1 HBARHAM2 + 1 SAM = 1 PHBAD1 + 1 SAH	0	10	Rv2959c	#	1 HBARHAM2 + 1 SAM = 1 PHBAD1 + 1 SAH
R667	PHBAD1 + GDPFUC + DTDP + 3 SAM = PHBAD2 + SAH	-10	10	Rv2957	#	PHBAD1 + GDPFUC + DTDP + 3 SAM = PHBAD2 + SAH
R668	PAPS + TRE = PAP + TRE_S	0	10	Rv3529c OR Rv1373 OR Rv2267c	#	PAPS + TRE = PAP + TRE_S
R669	0.333 EICOSANOYL_COA + 0.333 HEXADECANOYL_COA + 0.333 OCTADECANOYL_COA + TRE_S = ACYL_TRE_S_COA	0	10		#	0.333 EICOSANOYL_COA + 0.333 HEXADECANOYL_COA + 0.333 OCTADECANOYL_COA + TRE_S = ACYL_TRE_S_COA
R670	ACYL_TRE_S_COA + HYDROXYPHTHIOCERANOYL_COA = 2.0 COA + SL1278_CYTO	0	10		#	ACYL_TRE_S_COA + HYDROXYPHTHIOCERANOYL_COA = 2.0 COA + SL1278_CYTO
R671	SL1278_CYTO = SL1278_WALL	0	10	Rv3823c	#	SL1278_CYTO = SL1278_WALL
R672	6.0 NADPH + OCTADECANOYL_COA + 3.0 RMMALONYLACP = 2.0 ACP + 3.0 CO2 + COA + MYCOLIPANOIC_ACP + 6.0 NADP	0	10	Rv1180 AND Rv1181	#	6.0 NADPH + OCTADECANOYL_COA + 3.0 RMMALONYLACP = 2.0 ACP + 3.0 CO2 + COA + MYCOLIPANOIC_ACP + 6.0 NADP
R673	5.0 NADPH + OCTADECANOYL_COA + 3.0 RMMALONYLACP = 2.0 ACP + 3.0 CO2 + COA + MYCOLIPENOYL_ACP + 5.0 NADP	0	10	Rv1180 AND Rv1182	#	5.0 NADPH + OCTADECANOYL_COA + 3.0 RMMALONYLACP = 2.0 ACP + 3.0 CO2 + COA + MYCOLIPENOYL_ACP + 5.0 NADP
R674	4.0 NADPH + OCTADECANOYL_COA + 3.0 RMMALONYLACP = 2.0 ACP + 3.0 CO2 + COA + MYCOLIPDIENOYL_ACP + 4.0 NADP	0	10	Rv1180 AND Rv1183	#	4.0 NADPH + OCTADECANOYL_COA + 3.0 RMMALONYLACP = 2.0 ACP + 3.0 CO2 + COA + MYCOLIPDIENOYL_ACP + 4.0 NADP
R678	G3P + PYR = CO2 + DX5P	0	10	Rv3379c OR Rv2682c	#	G3P + PYR = CO2 + DX5P
R679	DX5P + NADPH = MDE4P + NADP	0	10	Rv2870c	#	DX5P + NADPH = MDE4P + NADP
R680	CTP + MDE4P = CDPMDE + PPI	0	10	Rv3582c	#	CTP + MDE4P = CDPMDE + PPI
R681	ATP + CDPMDE = 2PCDPMDE + ADP	0	10	Rv1011	#	ATP + CDPMDE = 2PCDPMDE + ADP
R682	2PCDPMDE = CMP + MDECPP	0	10	Rv3581c	#	2PCDPMDE = CMP + MDECPP
R683	MDECPP + NADH = HMB4PP + NAD	0	10	Rv2868c	#	MDECPP + NADH = HMB4PP + NAD
R684	HMB4PP + NADH = IPP + NAD	0	10	Rv3382c OR Rv1110	#	HMB4PP + NADH = IPP + NAD
R685	IPP = DMPP	-10	10	Rv1745c	#	IPP = DMPP
R686	DMPP + IPP = GPP + PPI	0	10	Rv3398c OR Rv3383c OR Rv2173	#	DMPP + IPP = GPP + PPI
R687	GPP + IPP = FPP + PPI	0	10	Rv1086	#	GPP + IPP = FPP + PPI
R688	FPP + IPP = GGPP + PPI	0	10	Rv3398c	#	FPP + IPP = GGPP + PPI
R689	GGPP + IPP = PPI + PPPP	0	10	Rv3398c	#	GGPP + IPP = PPI + PPPP
R690	IPP + PPPP = HPPP + PPI	0	10		#	IPP + PPPP = HPPP + PPI
R691	HPPP + IPP = HEPPP + PPI	0	10	Rv0562	#	HPPP + IPP = HEPPP + PPI
R692	HEPPP + IPP = OPP + PPI	0	10		#	HEPPP + IPP = OPP + PPI
R693	IPP + OPP = NPP + PPI	0	10		#	IPP + OPP = NPP + PPI
R694	FPP + 7.0 IPP = DPP	0	10	Rv2361c	#	FPP + 7.0 IPP = DPP
R695	DPP + PRPP = DPPPR + PPI	0	10	Rv3806c	#	DPP + PRPP = DPPPR + PPI
R696	DPPPR = DPPR + PI	0	10		#	DPPPR = DPPR + PI
R697	DPPR = ARAFDPP	0	10	Rv3790 AND Rv3791	#	DPPR = ARAFDPP
R698	ALA = DALA	-10	10	Rv3423c	#	ALA = DALA
R699	ATP + 2.0 DALA = ADP + ALAALA + PI	0	10	Rv2981c	#	ATP + 2.0 DALA = ADP + ALAALA + PI
R700	DPP + UDPNAG = NAGDPP + UMP	0	10		#	DPP + UDPNAG = NAGDPP + UMP
R701	DTDPRHAM + NAGDPP = DTDP + RHAMNAGDPP	0	10	Rv3265c OR Rv1525	#	DTDPRHAM + NAGDPP = DTDP + RHAMNAGDPP
R702	RHAMNAGDPP + 30.0 UDPGALF = GALACTANDPP + 30.0 UDP	-10	10	Rv3808c	#	RHAMNAGDPP + 30.0 UDPGALF = GALACTANDPP + 30.0 UDP
R705	ARAFDPP + GALACTANDPP = ARA[1]GALACTANDPP + DPP	-10	10	Rv3792	#	ARAFDPP + GALACTANDPP = ARA[1]GALACTANDPP + DPP
R706	70.0 ARAFDPP + ARA[1]GALACTANDPP = ARABINOGALACTANDPP + 70.0 DPP	-10	10	Rv3794 AND Rv3795	#	70.0 ARAFDPP + ARA[1]GALACTANDPP = ARABINOGALACTANDPP + 70.0 DPP
R707	DTTP + G1P = DTDPGLC + PPI	0	10	Rv0334	#	DTTP + G1P = DTDPGLC + PPI
R708	DTDPGLC = DTDP4DH6DGLC	-10	10	Rv3464 OR Rv3634c OR Rv3468 OR Rv3784	#	DTDPGLC = DTDP4DH6DGLC
R709	DTDP4DH6DGLC = DTDP4DH6DMAN	0	10	Rv3465	#	DTDP4DH6DGLC = DTDP4DH6DMAN
R710	DTDP4DH6DMAN + NADPH = DTDPRHAM + NADP	0	10	Rv3260c	#	DTDP4DH6DMAN + NADPH = DTDPRHAM + NADP
R711	UDPGAL = UDPGALF	0	10	Rv3809c	#	UDPGAL = UDPGALF
R712	F6P + GLN = GA6P + GLU	-10	10	Rv3436c	#	F6P + GLN = GA6P + GLU
R713	GLU = DGLU	0	10	Rv1338	#	GLU = DGLU
R714	GA6P = F6P + NH3	-10	10		#	GA6P = F6P + NH3
R715	GA1P = GA6P	-10	10	Rv3068c	#	GA1P = GA6P
R716	ACCOA + GA1P = COA + NAGA1P	-10	10		#	ACCOA + GA1P = COA + NAGA1P
R717	NAGA1P + UTP = PPI + UDPNAG	0	10	Rv1018c	#	NAGA1P + UTP = PPI + UDPNAG
R718	PEP + UDPNAG = UDPNAGPEE	-10	10	Rv1315	#	PEP + UDPNAG = UDPNAGPEE
R719	NADPH + UDPNAGPEE = NADP + UDPNAM	0	10	Rv0482	#	NADPH + UDPNAGPEE = NADP + UDPNAM
R722	NADPH + UDPNAM = NADP + UDPNGM	0	10	Rv3818	#	NADPH + UDPNAM = NADP + UDPNGM
R723	ALA + ATP + 0.3 UDPNAM + 0.7 UDPNGM = ADP + PI + UDP[NAM:NGM]ALA	-10	10	Rv2152c	#	ALA + ATP + 0.3 UDPNAM + 0.7 UDPNGM = ADP + PI + UDP[NAM:NGM]ALA
R724	ATP + DGLU + UDP[NAM:NGM]ALA = ADP + PI + UDP[NAM:NGM]ALAGLU	0	10	Rv2155c	#	ATP + DGLU + UDP[NAM:NGM]ALA = ADP + PI + UDP[NAM:NGM]ALAGLU
R725	ATP + MDAPIM + UDP[NAM:NGM]ALAGLU = ADP + PI + UDP[NAM:NGM]AGMDAPIM	0	10	Rv2158c	#	ATP + MDAPIM + UDP[NAM:NGM]ALAGLU = ADP + PI + UDP[NAM:NGM]AGMDAPIM
R726	ALAALA + ATP + UDP[NAM:NGM]AGMDAPIM = ADP + PI + UDP[NAM:NGM]AGMDAPIMAA	0	10	Rv2157c	#	ALAALA + ATP + UDP[NAM:NGM]AGMDAPIM = ADP + PI + UDP[NAM:NGM]AGMDAPIMAA
R727	DPP + UDP[NAM:NGM]AGMDAPIMAA = LIPID1 + UMP	-10	10	Rv2156c	#	DPP + UDP[NAM:NGM]AGMDAPIMAA = LIPID1 + UMP
R728	LIPID1 + UDPNAG = LIPID2 + UDP	0	10	Rv2153c	#	LIPID1 + UDPNAG = LIPID2 + UDP
R729	ATP + LIPID2 + NH3 = ADP + LIPID2_AMIDATED + PI	0	10		#	ATP + LIPID2 + NH3 = ADP + LIPID2_AMIDATED + PI
R730	LIPID2_AMIDATED = DPP + PEPTIDOGLYCAN	0	10		#	LIPID2_AMIDATED = DPP + PEPTIDOGLYCAN
R731	ARABINOGALACTANDPP + 30.0 PEPTIDOGLYCAN = ARABINOGALACTAN_PEPTIDOGLYCAN + DPP	0	10		#	ARABINOGALACTANDPP + 30.0 PEPTIDOGLYCAN = ARABINOGALACTAN_PEPTIDOGLYCAN + DPP
R_PROT	1.324 ALA + 0.696 ARG + 0.213 ASN + 0.537 ASP + 40.74 ATP + 0.094 CYS + 0.283 GLN + 0.429 GLU + 0.958 GLY + 0.208 HIS + 0.389 ILE + 0.899 LEU + 0.192 LYS + 0.173 MET + 0.26 PHE + 0.56 PRO + 0.541 SER + 0.556 THR + 0.132 TRP + 0.187 TYR + 0.832 VAL = PROTEIN	0	10		#	1.324 ALA + 0.696 ARG + 0.213 ASN + 0.537 ASP + 40.74 ATP + 0.094 CYS + 0.283 GLN + 0.429 GLU + 0.958 GLY + 0.208 HIS + 0.389 ILE + 0.899 LEU + 0.192 LYS + 0.173 MET + 0.26 PHE + 0.56 PRO + 0.541 SER + 0.556 THR + 0.132 TRP + 0.187 TYR + 0.832 VAL = PROTEIN
R_RNA	1.98 ATP + 0.708 CTP + 1.13 GTP + 0.641 UTP = 1.25 ADP + 1.25 PI + 3.21 PPI + RNA	0	10		#	1.98 ATP + 0.708 CTP + 1.13 GTP + 0.641 UTP = 1.25 ADP + 1.25 PI + 3.21 PPI + RNA
R_DNA	4.44 ATP + 0.557 DATP + 1.061 DCTP + 1.061 DGTP + 0.557 DTTP = 4.44 ADP + DNA + 4.44 PI + 3.24 PPI	0	10		#	4.44 ATP + 0.557 DATP + 1.061 DCTP + 1.061 DGTP + 0.557 DTTP = 4.44 ADP + DNA + 4.44 PI + 3.24 PPI
R_SM_MOL	0.012 ACP + 0.163 COA + 0.159 FAD + 0.001 FE2 + 0.001 FE3 + 0.001 FERI + 0.001 FERO + 0.274 FMN + 0.01 HEME_FE2 + 0.01 HEME_FE3 + 0.012 LIPO + 0.163 MAS + 0.012 MBT_HOLO + 0.146 MK + 0.01 MTR1P + 0.188 NAD + 0.168 NADP + 0.01 SPRMD = SMALLMOLECULES	0	10		#	0.012 ACP + 0.163 COA + 0.159 FAD + 0.001 FE2 + 0.001 FE3 + 0.001 FERI + 0.001 FERO + 0.274 FMN + 0.01 HEME_FE2 + 0.01 HEME_FE3 + 0.012 LIPO + 0.163 MAS + 0.012 MBT_HOLO + 0.146 MK + 0.01 MTR1P + 0.188 NAD + 0.168 NADP + 0.01 SPRMD = SMALLMOLECULES
R_PE	1.23 PS = 1.23 CO2 + PE	0	10	Rv0437c	#	1.23 PS = 1.23 CO2 + PE
R_TAG	0.11 9_HEXADECENOYL_COA + 0.11 9_OCTADECENOYL_COA + 1.16 DAG + 0.11 EICOSANOYL_COA + 0.11 HEXACOSANOYL_COA + 0.22 HEXADECANOYL_COA + 0.11 NONADECANOYL_COA + 0.11 OCTADECANOYL_COA + 0.11 PENTADECANOYL_COA + 0.11 TETRACOSANOYL_COA = 1.1 COA + 1.1 PI + TAGbio	0	10	Rv3130c OR Rv3734c OR Rv3234c OR Rv3088 OR Rv1760 OR Rv2285 OR Rv0221 OR Rv3740c OR Rv3087 OR Rv3371 OR Rv3480c OR Rv3233c OR Rv1425 OR Rv0895 OR Rv2484c	#	0.11 9_HEXADECENOYL_COA + 0.11 9_OCTADECENOYL_COA + 1.16 DAG + 0.11 EICOSANOYL_COA + 0.11 HEXACOSANOYL_COA + 0.22 HEXADECANOYL_COA + 0.11 NONADECANOYL_COA + 0.11 OCTADECANOYL_COA + 0.11 PENTADECANOYL_COA + 0.11 TETRACOSANOYL_COA = 1.1 COA + 1.1 PI + TAGbio
R_PIMS	0.082 AC2PIM1 + 0.082 AC2PIM2 + 0.082 AC3PIM5 + 0.082 AC4PIM6 + 0.082 AC4PIM7 = PIMS	0	10		#	0.082 AC2PIM1 + 0.082 AC2PIM2 + 0.082 AC3PIM5 + 0.082 AC4PIM6 + 0.082 AC4PIM7 = PIMS
R_LAM	4.5 ARAFDPP + 0.064 LM = 4.5 DPP + LAM	0	10	Rv3804c AND Rv1886c AND Rv0129c	#	4.5 ARAFDPP + 0.064 LM = 4.5 DPP + LAM
R_MAPC	0.008 ARABINOGALACTAN_PEPTIDOGLYCAN + 0.238 TREHALOSEMONOMYCOLATE = MAPC + 0.238 TRE	0	10	Rv2220	#	0.008 ARABINOGALACTAN_PEPTIDOGLYCAN + 0.238 TREHALOSEMONOMYCOLATE = MAPC + 0.238 TRE
R_P_L_GLX	3.4 GLN + 3.4 GLU = P_L_GLX	0	10		#	3.4 GLN + 3.4 GLU = P_L_GLX
R_CL	0.647 CDPDG + 0.647 PG = CL + 0.647 CMP	0	10	Rv1822	#	0.647 CDPDG + 0.647 PG = CL + 0.647 CMP
R_LM	0.2 AC3PIM2 + 3.6 PPM = 3.6 DPP + LM	0	10		#	0.2 AC3PIM2 + 3.6 PPM = 3.6 DPP + LM
R_SL_1	0.325 SL1278_WALL + 0.325 HYDROXYPHTHIOCERANOYL_COA + 0.325 PTHIOCERANOYL_COA = SL_1 + 0.65 COA	0	10		#	0.325 SL1278_WALL + 0.325 HYDROXYPHTHIOCERANOYL_COA + 0.325 PTHIOCERANOYL_COA = SL_1 + 0.65 COA
R_TDM	0.522 TREHALOSEMONOMYCOLATE(CY) = 0.522 TRE + TREHALOSEDIMYCOLATE	0	10	Rv3804c AND Rv1886c AND Rv0129c	#	0.522 TREHALOSEMONOMYCOLATE(CY) = 0.522 TRE + TREHALOSEDIMYCOLATE
R_TMM	0.48 ATP + 0.48 TREHALOSEMONOMYCOLATE(CY) = 0.48 ADP + 0.48 PI + TREHALOSEMONOMYCOLATE	0	10	Rv1273c AND Rv1272c OR Rv1348 AND Rv1349 OR Rv0194 OR Rv1819c OR Rv1747 OR Rv1687c AND Rv1686c	#	0.48 ATP + 0.48 TREHALOSEMONOMYCOLATE(CY) = 0.48 ADP + 0.48 PI + TREHALOSEMONOMYCOLATE
R_DAT	1.38 MYCOLIPENOYL_ACP + 0.69 TRE6P = 1.38 ACP + DIACYLTREHALOSE	0	10		#	1.38 MYCOLIPENOYL_ACP + 0.69 TRE6P = 1.38 ACP + DIACYLTREHALOSE
R_PGL	0.259 MYCOSIDE_B + 0.259 GDPFUC + 0.259 DTDP + 0.778 SAM = PGL_TB + 0.778 SAH	0	10	Rv2957	#	0.259 MYCOSIDE_B + 0.259 GDPFUC + 0.259 DTDP + 0.778 SAM = PGL_TB + 0.778 SAH
R_PAT	0.334 MYCOLIPANOIC_ACP + 0.668 MYCOLIPDIENOYL_ACP + 0.668 MYCOLIPENOYL_ACP + 0.334 TRE6P = 1.67 ACP + POLYACYLTREHALOSE	0	10		#	0.334 MYCOLIPANOIC_ACP + 0.668 MYCOLIPDIENOYL_ACP + 0.668 MYCOLIPENOYL_ACP + 0.334 TRE6P = 1.67 ACP + POLYACYLTREHALOSE
R_MPD	1.01 GDPMAN + 1.01 PHOSPHO_PENTA_METHYL_TRICONTANOYL_COA = 1.01 COA + 1.01 GDP + MPD	0	10		#	1.01 GDPMAN + 1.01 PHOSPHO_PENTA_METHYL_TRICONTANOYL_COA = 1.01 COA + 1.01 GDP + MPD
R_DIM	0.436 DIM_CYTO = DIM	0	10	Rv2942 AND RV2936 AND Rv2937 AND Rv2938	#	0.436 DIM_CYTO = DIM
R_GLUCAN	5.5 GLC = GLUCAN	0	10	Rv3793	#	5.5 GLC = GLUCAN
R_BIOMASSe	47.0 ATP + 0.022 DNA + 0.186 LAM + 0.208 MAPC + 0.035 P_L_GLX + 0.006 PE + 0.04 PIMS + 0.214 PROTEIN + 0.036 RNA + 0.05 SMALLMOLECULES + 0.016 TAGbio = 47.0 ADP + BIOMASS + 47.0 PI	0	10		#	47.0 ATP + 0.022 DNA + 0.186 LAM + 0.208 MAPC + 0.035 P_L_GLX + 0.006 PE + 0.04 PIMS + 0.214 PROTEIN + 0.036 RNA + 0.05 SMALLMOLECULES + 0.016 TAGbio = 47.0 ADP + BIOMASS + 47.0 PI
R_BXT	BIOMASS = BIOMASS_b	0	10		#	BIOMASS = BIOMASS_b
R800	NH3_e = NH3	-10	10		#	NH3_e = NH3
R801	NO3_e + H = NO3	-10	10	Rv1737c	#	NO3_e + H = NO3
R803	NO2_e = NO2	-10	10		#	NO2_e = NO2
R804	O2_e = O2	-10	10		#	O2_e = O2
R805	CO2_e = CO2	-10	10		#	CO2_e = CO2
R806	FOR_e = FOR	0	1		#	FOR_e = FOR
R807	GLYCOLATE_e = GLYCOLATE	0	1		#	GLYCOLATE_e = GLYCOLATE
R808	AC_e = AC	0	1		#	AC_e = AC
R809	ACAL_e = ACAL	0	1		#	ACAL_e = ACAL
R810	AN_e = AN	0	1		#	AN_e = AN
R811	CITR_e = CITR	0	1		#	CITR_e = CITR
R812	GL_e = GL	0	1		#	GL_e = GL
R813	GLYN_e = GLYN	0	0		#	GLYN_e = GLYN
R814	GN_e = GN	0	1		#	GN_e = GN
R815	HYXN_e = HYXN	0	1		#	HYXN_e = HYXN
R816	NAC_e = NAC	0	1		#	NAC_e = NAC
R817	T3_e = T3	0	1		#	T3_e = T3
R818	UREA_e = UREA	0	1		#	UREA_e = UREA
R819	XAN_e = XAN	0	1		#	XAN_e = XAN
R820	ALA_e + ATP = ADP + ALA	0	1		#	ALA_e + ATP = ADP + ALA
R821	ARG_e + ATP = ADP + ARG + PI	0	1		#	ARG_e + ATP = ADP + ARG + PI
R822	ASN_e + ATP = ADP + ASN + PI	0	1		#	ASN_e + ATP = ADP + ASN + PI
R823	ASP_e + ATP = ADP + ASP + PI	0	1	Rv2127	#	ASP_e + ATP = ADP + ASP + PI
R824	ATP + SUC_e = ADP + PI + SUC	0	1		#	ATP + SUC_e = ADP + PI + SUC
R825	ATP + CELB_e = ADP + CELB + PI	0	1		#	ATP + CELB_e = ADP + CELB + PI
R826	ATP + CYS_e = ADP + CYS + PI	0	1	Rv2834c	#	ATP + CYS_e = ADP + CYS + PI
R827	ATP + DAPIM_e = ADP + DAPIM + PI	0	1		#	ATP + DAPIM_e = ADP + DAPIM + PI
R828	ATP + DGLU_e = ADP + DGLU + PI	0	1		#	ATP + DGLU_e = ADP + DGLU + PI
R829	ATP + GLN_e = ADP + GLN + PI	0	1	Rv0411c AND Rv2565	#	ATP + GLN_e = ADP + GLN + PI
R830	ATP + GLU_e = ADP + GLU + PI	0	1		#	ATP + GLU_e = ADP + GLU + PI
R831	ATP + HIS_e = ADP + HIS + PI	0	1	Rv0411c	#	ATP + HIS_e = ADP + HIS + PI
R832	ATP + ILE_e = ADP + ILE + PI	0	1		#	ATP + ILE_e = ADP + ILE + PI
R833	ATP + LEU_e = ADP + LEU + PI	0	1		#	ATP + LEU_e = ADP + LEU + PI
R834	ATP + LYS_e = ADP + LYS + PI	0	1		#	ATP + LYS_e = ADP + LYS + PI
R835	ATP + MET_e = ADP + MET + PI	0	1		#	ATP + MET_e = ADP + MET + PI
R836	ATP + MLT_e = ADP + MLT + PI	0	1		#	ATP + MLT_e = ADP + MLT + PI
R837	ORN_e + ATP = ORN + ADP + PI	0	1	Rv2833c AND Rv2835c AND Rv2834c AND Rv2832c	#	ORN_e + ATP = ORN + ADP + PI
R838	PI_e + ATP = 2 PI + ADP	0	10	Rv0934 AND Rv0936 AND Rv0935 AND Rv0933 OR Rv0932c AND Rv0930 AND Rv0929 AND Rv0933 OR Rv0928 AND Rv0930 AND Rv0928 AND Rv0933	#	PI_e + ATP = 2 PI + ADP
R839	PRO_e + ATP = PRO + ADP + PI	0	0	Rv0934 AND Rv0935 AND Rv0936 AND Rv0933	#	PRO_e + ATP = PRO + ADP + PI
R840	ATP + RIB_e = ADP + PI + RIB	0	1	Rv0934 AND Rv0936 AND Rv0935 AND Rv0933 OR Rv0932c AND Rv0930 AND Rv0929 AND Rv0933 OR Rv0928 AND Rv0930 AND Rv0928 AND Rv0933	#	ATP + RIB_e = ADP + PI + RIB
R841	ATP + SLF_e = ADP + PI + SLF	0	10	Rv0934 AND Rv0935 AND Rv0936 AND Rv0933	#	ATP + SLF_e = ADP + PI + SLF
R842	ATP + THR_e = ADP + PI + THR	0	1		#	ATP + THR_e = ADP + PI + THR
R843	ATP + VAL_e = ADP + PI + VAL	0	1	Rv2397c AND Rv2398c AND Rv2399c AND Rv2400c	#	ATP + VAL_e = ADP + PI + VAL
R844	AC_e + H = AC	0	1		#	AC_e + H = AC
R845	AD_e + H = AD	0	1		#	AD_e + H = AD
R846	ADN_e + H = ADN	0	1		#	ADN_e + H = ADN
R847	AKG_e + H = AKG	0	1		#	AKG_e + H = AKG
R848	ASP_e + H = ASP	0	1		#	ASP_e + H = ASP
R849	ASP_e + 2.0 H = ASP	0	1		#	ASP_e + 2.0 H = ASP
R850	ASP_e + 3.0 H = ASP	0	1		#	ASP_e + 3.0 H = ASP
R851	CIT_e + 3.0 H = CIT	0	1		#	CIT_e + 3.0 H = CIT
R852	DA_e + H = DA	0	1		#	DA_e + H = DA
R853	DALA_e + H = DALA	0	1		#	DALA_e + H = DALA
R854	DC_e + H = DC	0	1		#	DC_e + H = DC
R855	DIN_e + H = DIN	0	1		#	DIN_e + H = DIN
R856	DT_e + H = DT	0	1		#	DT_e + H = DT
R857	DU_e + H = DU	0	1		#	DU_e + H = DU
R858	ETH_e + H = ETH	0	1		#	ETH_e + H = ETH
R859	FUM_e + 2.0 H = FUM	0	1		#	FUM_e + 2.0 H = FUM
R860	FUM_e + 3.0 H = FUM	0	1		#	FUM_e + 3.0 H = FUM
R861	GABA_e + H = GABA	0	1		#	GABA_e + H = GABA
R862	GLAC_e + H = GLAC	0	1		#	GLAC_e + H = GLAC
R863	GLC_e + H = GLC	0	1		#	GLC_e + H = GLC
R864	GLU_e + H = GLU	0	1		#	GLU_e + H = GLU
R865	GLUC_e + H = GLUC	0	1		#	GLUC_e + H = GLUC
R866	GLY_e + H = GLY	0	1		#	GLY_e + H = GLY
R867	GSN_e + H = GSN	0	1		#	GSN_e + H = GSN
R868	H + HIS_e = HIS	0	1		#	H + HIS_e = HIS
R869	HIS = H + HIS_e	0	1		#	HIS = H + HIS_e
R870	H + ILE_e = ILE	0	1		#	H + ILE_e = ILE
R871	ILE = H + ILE_e	0	1		#	ILE = H + ILE_e
R872	H + INS_e = INS	0	1		#	H + INS_e = INS
R873	H + LAC_e = LAC	0	1		#	H + LAC_e = LAC
R874	H + LEU_e = LEU	0	1		#	H + LEU_e = LEU
R875	LEU = H + LEU_e	0	1		#	LEU = H + LEU_e
R876	H + LLAC_e = LLAC	0	1		#	H + LLAC_e = LLAC
R877	H + LYS_e = LYS	0	1		#	H + LYS_e = LYS
R878	LYS = H + LYS_e	0	1		#	LYS = H + LYS_e
R879	2.0 H + MAL_e = MAL	0	1		#	2.0 H + MAL_e = MAL
R880	3.0 H + MAL_e = MAL	0	1		#	3.0 H + MAL_e = MAL
R881	H + PHE_e = PHE	0	1		#	H + PHE_e = PHE
R882	H + PI_e = PI	0	1		#	H + PI_e = PI
R883	H + PRO_e = PRO	0	1	Rv2281	#	H + PRO_e = PRO
R884	PRO = H + PRO_e	0	1		#	PRO = H + PRO_e
R885	H + PYR_e = PYR	0	1		#	H + PYR_e = PYR
R886	H + SER_e = SER	0	1		#	H + SER_e = SER
R887	SER = H + SER_e	0	1		#	SER = H + SER_e
R888	2.0 H + SUCC_e = SUCC	0	1		#	2.0 H + SUCC_e = SUCC
R889	3.0 H + SUCC_e = SUCC	0	1		#	3.0 H + SUCC_e = SUCC
R890	SUCC = H + SUCC_e	0	1		#	SUCC = H + SUCC_e
R891	H + THR_e = THR	0	1		#	H + THR_e = THR
R892	THR = H + THR_e	0	1		#	THR = H + THR_e
R893	H + TRP_e = TRP	0	1		#	H + TRP_e = TRP
R894	H + TYR_e = TYR	0	1		#	H + TYR_e = TYR
R895	H + URA_e = URA	0	1		#	H + URA_e = URA
R896	H + URI_e = URI	0	1		#	H + URI_e = URI
R897	H + VAL_e = VAL	0	1		#	H + VAL_e = VAL
R898	VAL = H + VAL_e	0	1		#	VAL = H + VAL_e
R899	FRU_e + PEP = F6P + PYR	0	1		#	FRU_e + PEP = F6P + PYR
R900	FRU_e + PEP = F1P + PYR	0	1		#	FRU_e + PEP = F1P + PYR
R901	MAN_e + PEP = MAN6P + PYR	0	1		#	MAN_e + PEP = MAN6P + PYR
R902	PEP + TRE_e = PYR + TRE6P	0	1		#	PEP + TRE_e = PYR + TRE6P
R903	CADA + H + LYS_e = CADA_e + LYS	0	1		#	CADA + H + LYS_e = CADA_e + LYS
R904	CIT_e + SUCC = CIT + SUCC_e	0	1		#	CIT_e + SUCC = CIT + SUCC_e
R905	FUM_e + SUCC = FUM + SUCC_e	0	1		#	FUM_e + SUCC = FUM + SUCC_e
R906	GL3P_e + PI = PI_e + GL3P	0	0		#	GL3P_e + PI = PI_e + GL3P
R907	PROPANOATE_e = PROPANOATE	0	1		#	PROPANOATE_e = PROPANOATE
R908	HEXANOATE_e = HEXANOATE	0	1		#	HEXANOATE_e = HEXANOATE
R909	HEXACOSANOATE_e = HEXACOSANOATE	0	1		#	HEXACOSANOATE_e = HEXACOSANOATE
R910	TETRACOSANOATE_e = TETRACOSANOATE	0	1		#	TETRACOSANOATE_e = TETRACOSANOATE
R911	TETRADECANOATE_e = TETRADECANOATE	0	1		#	TETRADECANOATE_e = TETRADECANOATE
R912	EICOSANOATE_e = EICOSANOATE	0	1		#	EICOSANOATE_e = EICOSANOATE
R913	PENTADECANOATE_e = PENTADECANOATE	0	1		#	PENTADECANOATE_e = PENTADECANOATE
R914	HEPTADECANOATE_e = HEPTADECANOATE	0	1		#	HEPTADECANOATE_e = HEPTADECANOATE
R915	NONADECANOATE_e = NONADECANOATE	0	1		#	NONADECANOATE_e = NONADECANOATE
R916	HEXADECANOATE_e = HEXADECANOATE	0	1		#	HEXADECANOATE_e = HEXADECANOATE
R917	9_HEXADECENOATE_e = 9_HEXADECENOATE	0	1		#	9_HEXADECENOATE_e = 9_HEXADECENOATE
R918	9_OCTADECENOATE_e = 9_OCTADECENOATE	0	1		#	9_OCTADECENOATE_e = 9_OCTADECENOATE
R919	PENTADECANOATE_e = PENTADECANOATE	0	1		#	PENTADECANOATE_e = PENTADECANOATE
R920	DODECANOATE_e = DODECANOATE	0	1		#	DODECANOATE_e = DODECANOATE
R921	TAG_e = TAGcat	0	1		#	TAG_e = TAGcat
R922	PHOSPHATIDYLCHOLINE_e = PHOSPHATIDYLCHOLINE	0	1		#	PHOSPHATIDYLCHOLINE_e = PHOSPHATIDYLCHOLINE
R923	ATP + FE3_e + 0.001 MBTSEC + 0.001 MBTWALL = ADP + FE3 + PI	0	10		#	ATP + FE3_e + 0.001 MBTSEC + 0.001 MBTWALL = ADP + FE3 + PI
R924	CIT_e + FE3_e = CIT + FE3	0	10		#	CIT_e + FE3_e = CIT + FE3
R925	BIOTIN_e = BIOTIN	0	10		#	BIOTIN_e = BIOTIN
R926	CO_II_e = CO_II	0	10		#	CO_II_e = CO_II
R927	MO2_e = MO2	0	10		#	MO2_e = MO2
R928	BSA = 0.05 ALA_e + 0.05 ARG_e + 0.05 ASN_e + 0.05 ASP_e + 0.05 CYS_e + 0.05 GLN_e + 0.05 GLU_e + 0.05 GLY_e + 0.05 HIS_e + 0.05 ILE_e + 0.05 LEU_e + 0.05 LYS_e + 0.05 MET_e + 0.05 PHE_e + 0.05 PRO_e + 0.05 SER_e + 0.05 THR_e + 0.05 TRP_e + 0.05 TYR_e + 0.05 VAL_e	0	1		#	BSA = 0.05 ALA_e + 0.05 ARG_e + 0.05 ASN_e + 0.05 ASP_e + 0.05 CYS_e + 0.05 GLN_e + 0.05 GLU_e + 0.05 GLY_e + 0.05 HIS_e + 0.05 ILE_e + 0.05 LEU_e + 0.05 LYS_e + 0.05 MET_e + 0.05 PHE_e + 0.05 PRO_e + 0.05 SER_e + 0.05 THR_e + 0.05 TRP_e + 0.05 TYR_e + 0.05 VAL_e
R929	ELECTROPHILE_X_e = ELECTROPHILE_X	0	1		#	ELECTROPHILE_X_e = ELECTROPHILE_X
R930	H2X_e = H2X	0	1		#	H2X_e = H2X
R931	N_ACETYL_S_CONJUGATE_e = N_ACETYL_S_CONJUGATE	0	1		#	N_ACETYL_S_CONJUGATE_e = N_ACETYL_S_CONJUGATE
R932	CHOLESTEROL_e = CHOLESTEROL	0	1	Rv3494c AND Rv3495c AND Rv3496c AND Rv3497c AND Rv3498c AND Rv3499c AND Rv3500c AND Rv3501c AND Rv0655	#	CHOLESTEROL_e = CHOLESTEROL
R933	CHOLESTEROL = 4ADSD	0	1	Rv1106c	#	CHOLESTEROL = 4ADSD
R934	4ADSD = ADD	0	1	Rv3537	#	4ADSD = ADD
R935	ADD = 9OHADD	0	1	Rv3526 AND Rv3571	#	ADD = 9OHADD
R936	9OHADD = 3HSA	0	1		#	9OHADD = 3HSA
R937	3HSA = 34DHSA	0	1	Rv3570c AND Rv3567c	#	3HSA = 34DHSA
R938	34DHSA = 49DHSA	0	1	Rv3568c	#	34DHSA = 49DHSA
R939	49DHSA = DOHNAA	0	1	Rv3569c	#	49DHSA = DOHNAA
R940	DOHNAA + 3 COA = 4ANDROSTENEDIONE + 2 PROPIONYLCOA + ACCOA	0	1	Rv3502c AND Rv3538 AND Rv3504 AND Rv3505 AND Rv3506 AND Rv3515c AND Rv3516 AND Rv3522 AND Rv3523	#	DOHNAA + 3 COA = 4ANDROSTENEDIONE + 2 PROPIONYLCOA + ACCOA
R941	4ANDROSTENEDIONE + 3 COA = 3 PROPIONYLCOA + PYR	0	1	Rv3569c AND Rv3534c AND Rv3535c AND Rv3536c	#	4ANDROSTENEDIONE + 3 COA = 3 PROPIONYLCOA + PYR
R_EX_9_HEXADECENOATE	9_HEXADECENOATE_e = 9_HEXADECENOATE_b	0	10		#
R_EX_9_OCTADECENOATE	9_OCTADECENOATE_e = 9_OCTADECENOATE_b	0	10		#
R_EX_AC	AC_e = AC_b	0	10		#acetate
R_EX_ACAL	ACAL_e = ACAL_b	0	10		#acetaldehyde
R_EX_AD	AD_e = AD_b	0	10		#adenine
R_EX_ADN	ADN_e = ADN_b	0	10		#adenosine
R_EX_AKG	AKG_e = AKG_b	0	10		#ketoglutarate
R_EX_ALA	ALA_e = ALA_b	0	10		#D-alanine
R_EX_AN	AN_e = AN_b	0	10		#anthranilate
R_EX_ARG	ARG_e = ARG_b	0	10		#L-arginine
R_EX_ASN	ASN_e = ASN_b	0	10		#L-asparagine
R_EX_ASP	ASP_e = ASP_b	0	10		#L-aspartate
R_EX_BIOTIN	BIOTIN_e = BIOTIN_b	0	10		#biotin
R_EX_CADA	CADA_e = CADA_b	0	10		#cadaverine
R_EX_CELB	CELB_e = CELB_b	0	10		#cellobiose
R_EX_CHOLESTEROL	CHOLESTEROL_e = CHOLESTEROL_b	0	10		#
R_EX_CIT	CIT_e = CIT_b	0	10		#citrate
R_EX_CITR	CITR_e = CITR_b	0	10		#citrulline
R_EX_CO_II	CO_II_e = CO_II_b	0	10		#
R_EX_CO2	CO2_e = CO2_b	0	10		#carbon_dioxide
R_EX_CYS	CYS_e = CYS_b	0	10		#L-cysteine
R_EX_DA	DA_e = DA_b	0	10		#deoxyadenosine
R_EX_DALA	DALA_e = DALA_b	0	10		#D-alanine
R_EX_DAPIM	DAPIM_e = DAPIM_b	0	10		#L,L-diaminopimelate
R_EX_DC	DC_e = DC_b	0	10		#
R_EX_DGLU	DGLU_e = DGLU_b	0	10		#D-glutamate
R_EX_DIN	DIN_e = DIN_b	0	10		#deoxyinosine
R_EX_DODECANOATE	DODECANOATE_e = DODECANOATE_b	0	10		#dodecanoate
R_EX_DT	DT_e = DT_b	0	10		#thymidine
R_EX_DU	DU_e = DU_b	0	10		#
R_EX_EICOSANOATE	EICOSANOATE_e = EICOSANOATE_b	0	10		#eicosanoate
R_EX_ELECTROPHILE_X	ELECTROPHILE_X_e = ELECTROPHILE_X_b	0	10		#
R_EX_ETH	ETH_e = ETH_b	0	10		#ethanol
R_EX_FE3	FE3_e = FE3_b	0	10		#ferric iron
R_EX_FOR	FOR_e = FOR_b	0	10		#formate
R_EX_FRU	FRU_e = FRU_b	0	10		#fructose
R_EX_FUM	FUM_e = FUM_b	0	10		#fumarate
R_EX_GABA	GABA_e = GABA_b	0	10		#4-aminobutyrate_(GABA)
R_EX_GL	GL_e = GL_b	0	10		#Glycerol
R_EX_GL3P	GL3P_e = GL3P_b	0	10		#glycerol-3-phosphate
R_EX_GLAC	GLAC_e = GLAC_b	0	10		#D-galactose
R_EX_GLC	GLC_e = GLC_b	0	10		#D-glucose
R_EX_GLN	GLN_e = GLN_b	0	10		#glutamine
R_EX_GLU	GLU_e = GLU_b	0	10		#glutamate
R_EX_GLUC	GLUC_e = GLUC_b	0	10		#
R_EX_GLY	GLY_e = GLY_b	0	10		#glycine
R_EX_GLYCOLATE	GLYCOLATE_e = GLYCOLATE_b	0	10		#glycolate
R_EX_GLYN	GLYN_e = GLYN_b	0	10		#
R_EX_GN	GN_e = GN_b	0	10		#guanine
R_EX_GSN	GSN_e = GSN_b	0	10		#guanosine
R_EX_H2X	H2X_e = H2X_b	0	10		#
R_EX_HEPTADECANOATE	HEPTADECANOATE_e = HEPTADECANOATE_b	0	10		#heptadecanoate
R_EX_HEXACOSANOATE	HEXACOSANOATE_e = HEXACOSANOATE_b	0	10		#hexacosanoate
R_EX_HEXADECANOATE	HEXADECANOATE_e = HEXADECANOATE_b	0	10		#hexadecanoate
R_EX_HEXANOATE	HEXANOATE_e = HEXANOATE_b	0	10		#hexanoate
R_EX_HIS	HIS_e = HIS_b	0	10		#L-histidine
R_EX_HYXN	HYXN_e = HYXN_b	0	10		#hypoxanthine
R_EX_ILE	ILE_e = ILE_b	0	10		#L-isoleucine
R_EX_INS	INS_e = INS_b	0	10		#inosine
R_EX_LAC	LAC_e = LAC_b	0	10		#D-lactate
R_EX_LEU	LEU_e = LEU_b	0	10		#L-leucine
R_EX_LLAC	LLAC_e = LLAC_b	0	10		#lactate
R_EX_LYS	LYS_e = LYS_b	0	10		#L-lysine
R_EX_MAL	MAL_e = MAL_b	0	10		#malate
R_EX_MAN	MAN_e = MAN_b	0	10		#mannose
R_EX_MET	MET_e = MET_b	0	10		#methionine
R_EX_MLT	MLT_e = MLT_b	0	10		#maltose
R_EX_MO2	MO2_e = MO2_b	0	10		#molybdenum_ion
R_EX_N_ACETYL_S_CONJUGATE	N_ACETYL_S_CONJUGATE_e = N_ACETYL_S_CONJUGATE_b	0	10		#
R_EX_NAC	NAC_e = NAC_b	0	10		#nicotinate
R_EX_NH3	NH3_e = NH3_b	0	10		#ammonia
R_EX_NO2	NO2_e = NO2_b	0	10		#nitrite
R_EX_NO3	NO3_e = NO3_b	0	10		#nitrate
R_EX_NONADECANOATE	NONADECANOATE_e = NONADECANOATE_b	0	10		#nonadecanoate
R_EX_O2	O2_e = O2_b	0	10		#oxygen
R_EX_ORN	ORN_e = ORN_b	0	10		#ornithine
R_EX_PENTADECANOATE	PENTADECANOATE_e = PENTADECANOATE_b	0	10		#pentadecanoate
R_EX_PHE	PHE_e = PHE_b	0	10		#phenylalanine
R_EX_PHOSPHATIDYLCHOLINE	PHOSPHATIDYLCHOLINE_e = PHOSPHATIDYLCHOLINE_b	0	10		#phosphatidylcholine
R_EX_PI	PI_e = PI_b	0	10		#phosphate
R_EX_PRO	PRO_e = PRO_b	0	10		#proline
R_EX_PROPANOATE	PROPANOATE_e = PROPANOATE_b	0	10		#propanoate
R_EX_PYR	PYR_e = PYR_b	0	10		#pyruvate
R_EX_RIB	RIB_e = RIB_b	0	10		#Ribose
R_EX_SER	SER_e = SER_b	0	10		#serine
R_EX_SLF	SLF_e = SLF_b	0	10		#sulfate
R_EX_SUC	SUC_e = SUC_b	0	10		#sucrose
R_EX_SUCC	SUCC_e = SUCC_b	0	10		#succinate
R_EX_T3	T3_e = T3_b	0	10		#D-glyceraldehyde-3-phosphate
R_EX_TAG	TAG_e = TAG_b	0	10		#triacylglycerol
R_EX_TETRACOSANOATE	TETRACOSANOATE_e = TETRACOSANOATE_b	0	10		#tetracosanoate
R_EX_TETRADECANOATE	TETRADECANOATE_e = TETRADECANOATE_b	0	10		#tetradecanoate
R_EX_THR	THR_e = THR_b	0	10		#threonine
R_EX_TRE	TRE_e = TRE_b	0	10		#trehalose
R_EX_TRP	TRP_e = TRP_b	0	10		#tryptophan
R_EX_TYR	TYR_e = TYR_b	0	10		#tyrosine
R_EX_URA	URA_e = URA_b	0	10		#uracil
R_EX_UREA	UREA_e = UREA_b	0	10		#urea
R_EX_URI	URI_e = URI_b	0	10		#
R_EX_VAL	VAL_e = VAL_b	0	10		#valine
R_EX_XAN	XAN_e = XAN_b	0	10		#xanthine

## Sheet: metabolite_name
ID	Name
13PDG	1,3-diphosphateglycerate
1-AMINO-PROPAN-2-OL	1-amino-propan-2-ol
2A3KB	2-amino-3-oxobutanoate
2MBECOA	2-methylbut-2-enoyl-CoA (tiglyl-CoA, 2-methylcrotonoyl-CoA)
2MBUTCOA	S-2-methyl-butyryl-CoA
2MBUTLIPO	enzyme_N6-(S-[2-methylpropanoyl]dihydrolipoyl)lysine
2METHYLCISACONITATE	2-methyl-cis-aconitate
2METHYLCITRATE	2-methylcitrate
2PCDPMDE	2-phospho-4-(cytidine_5'-diphospho)-2-C-methyl-D-erythritol
2PG	2-phosphoglycerate
2-PHOSPHO-L-LACTATE	2-phospho-L-lactate
3DDAH7P	3-deoxy-D-arabino-heptulosonate-7-phosphate
3MBECOA	3-methylbut-2-enoyl-CoA (3-methylcrotonyl-CoA)
3MBUTCOA	S-3-methyl-butyryl-CoA
3MBUTLIPO	enzyme_N6-(S-[3-methylbutanoyl]dihydrolipoyl)lysine
3PG	3-phosphoglycerate
3PSER	3-phospho-serine
3PSME	5-enolpyruvyl-shikimate-3-phosphate
4HPP	p-hydroxyphenylpyruvate
4PPNCYS	R-4'-phosphopantothenoyl-L-cysteine
4PPNTE	pantetheine_4'-phosphate
4PPNTO	D-4'-phosphopantothenate
5-AMINO-LEVULINATE	5-amino-levulinate
5MTA	5'-methylthioadenosine
5PARAPP	5'-phosphoarabinose-pyrophosphate
7-8-DIAMINONONANOATE	7,8-Diaminononanoate
8-AMINO7-OXONONANOATE	8-amino-7-oxononanoate
9-HEXADECENOATE	9-hexadecenoate
9-HEXADECENOYL-ACP	9-hexadecenoyl-ACP
9-HEXADECENOYL-COA	9-hexadecenoyl-CoA
9-OCTADECENOATE	9-octadecenoate
9-OCTADECENOYL-ACP	9-octadecenoyl-ACP
9-OCTADECENOYL-COA	9-octadecenoyl-CoA
A160GL3P	A160GL3P
A6RP	5-amino-6-(5'-phosphoribosylamino)uracil
A6RP5P	5-amino-6-(5'-phosphoribitylamino)uracil
A6RP5P2	5-amino-6-(5'-phosphoribosylamino)uracil
AACCOA	acetoacetyl-CoA
ABUT	2-aceto-2-hydroxy-butyrate
AC	acetate
AC1PIM1	intermediate in phosphatidylinositol mannoside synthesis
AC1PIM2	intermediate in phosphatidylinositol mannoside synthesis
AC1PIM3	intermediate in phosphatidylinositol mannoside synthesis
AC2PIM1	intermediate in phosphatidylinositol mannoside synthesis
AC2PIM2	intermediate in phosphatidylinositol mannoside synthesis
AC2PIM3	intermediate in phosphatidylinositol mannoside synthesis
AC3PIM1	intermediate in phosphatidylinositol mannoside synthesis
AC3PIM2	intermediate in phosphatidylinositol mannoside synthesis
AC3PIM3	intermediate in phosphatidylinositol mannoside synthesis
AC3PIM4	intermediate in phosphatidylinositol mannoside synthesis
AC3PIM5	intermediate in phosphatidylinositol mannoside synthesis
AC4PIM1	intermediate in phosphatidylinositol mannoside synthesis
AC4PIM2	intermediate in phosphatidylinositol mannoside synthesis
AC4PIM3	intermediate in phosphatidylinositol mannoside synthesis
AC4PIM5	intermediate in phosphatidylinositol mannoside synthesis
AC4PIM6	intermediate in phosphatidylinositol mannoside synthesis
AC4PIM7	intermediate in phosphatidylinositol mannoside synthesis
ACACP	acetyl-ACP
ACAL	acetaldehyde
ACCOA	acetyl-CoA
ACETYLP	acetylphosphate
ACLAC	2-acetolactate
ACP	acyl-carrier-protein
ACRCOA	acrylyl-CoA
ACTAC	acetoacetate
ACYL-MAS	ACYL-MAS
ACYL-TRE-S-COA	ACYL-TRE-S-COA
AD	adenine
ADCHOR	4-amino-4-deoxychorismate
ADENOSYLCOBINAMIDE	adenosylcobinamide
ADENOSYLCOBINAMIDE-GDP	adenosylcobinamide-GDP
ADENOSYLCOBINIMIDE-P	adenosylcobinamide-P
ADENOSYL-COBRATE	adenosyl-cobyrate
ADENOSYL-COBRINICACID-A-C-DIAMIDE	adenosyl-cobyrinic acid a,c-diamide
ADLIPO	enzyme_N6-(S-acetyldihydrolipoyl)lysine
ADN	adenosine
ADP	adenosine-diphosphate
AGL3P	1-acyl-sn-glycerol-3P
AHHMD	2-amino-4-hydroxy-6-hydroxymethyl-7,8-dihydropteridine_diphosphate
AHHMP	6-hydroxymethyl-dihydropterin
AHMMP	hydroxymethylpyrimidine
AHTD	7,8-dihydroneopterin_3'-triphosphate
AICAR	amino-4-imidazolecarboxamide_ribotide
AIR	5-aminoimidazole_ribonucleotide
AKG	¦Á-ketoglutarate
AKP	2-dehydropantoate
ALA	D-alanine
ALAALA	D-alanyl-D-alanine
AMINOACETONE	aminoacetone
AMP	adenosine-monophosphate
AMPMP	hydroxymethylpyrimidine_phosphate
AN	anthranilate
APS	adenylyl-sulfate
ARABINOGALACTAN_PEPTIDOGLYCAN	arabinogalactan_peptidoglycan
ARABINOGALACTANDPP	arabinogalactan-decaprenylphosphate
ARAbr1brGALACTANDPP	ARA[1]GALACTANDPP
ARAFDPP	arabinofuranose-decaprenylphosphate
ARG	L-arginine
ARGSUCC	L-arginino-succinate
ASER	O-acetyl-L-serine
ASN	L-asparagine
ASP	L-aspartate
ASP4P	L-aspartyl-4-phosphate
ASPSA	L-aspartate-semialdehyde
ASUC	adenylo-succinate
ATP	adenosine-triphosphate
bALA	¦Â-alanine
bDG1P	¦Â-D-Glucose_1-phosphate
bDG6P	¦Â-D-glucose-6-phosphate
bDGLC	¦Â-D-glucose
BETA-KETO-C22-ACYL-ACP	intermediate in mycolic acid synthesis
BIOMASS	biomass
BIOTIN	biotin
BIOTIN-BCCP	biotin-BCCP
BIOTIN-CO2	BCCP-biotin-CO2
brn-1brPOLYP	(polyphosphate)(n-1)
brnbrPOLYP	(polyphosphate)(n)
BUTANOYL-COA	butanoyl-CoA
C78-3-OXY-MYCOLATE-ENZ	3-oxo-C78-¦Á-mycolate-ENZ
C78MYCOLATE-ENZ	intermediate in mycolic acid synthesis
C78MYCOLATE-PP	intermediate in mycolic acid synthesis
CAASP	carbamoyl-L-aspartate
CADA	cadaverine
CAIR	4-carboxyaminoimidazole_ribonucleotide
cAMP	cyclic-AMP
CAP	carbamoyl-phosphate
CATECHOL	catechol
CBHCAP	3-carboxy-2-hydroxy-4-methylpentanoate
CDP	cytidine-diphosphate
CDPDAG-TBA	CDP-diacylglycerol-TBA
CDPDG	CDP-diacylglycerol
CDPMDE	4-(cytidine_5'-diphospho)-2-C-methyl-D-erythritol
CELB	cellobiose
cGMP	cyclic-GMP
CHOR	chorismate
CIS-DELTA-13-ENOYL-C32-ACYL-ACP	intermediate in mycolic acid synthesis
CIS-DELTA-19-ENOYL-C38-ACYL-ACP	intermediate in mycolic acid synthesis
CIS-DELTA-2-19,31-ENOYL-C50-ACYL-ACP	intermediate in mycolic acid synthesis
CIS-DELTA-2-19,37-ENOYL-C56-ACYL-ACP	intermediate in mycolic acid synthesis
CIS-DELTA-2-3,15-ENOYL-C34-ACYL-ACP	intermediate in mycolic acid synthesis
CIS-DELTA-2-3,21-ENOYL-C40-ACYL-ACP	intermediate in mycolic acid synthesis
CIS-DELTA-37-ENOYL-DIMETHY-HYDROXY-C56-ACYL-ACP	intermediate in mycolic acid synthesis
CIS-DELTA-37-ENOYL-METHY-HYDROXY-C56-ACYL-ACP	intermediate in mycolic acid synthesis
CIS-DELTA-3-DODECANOYL-COA	intermediate in mycolic acid synthesis
CIS-DELTA-3-ENOYL-C22-ACYL-ACP	intermediate in mycolic acid synthesis
CIS-DELTA-5-TETRADECANOYL-COA	intermediate in mycolic acid synthesis
CIS-KETO-MEROACYL-ACP	intermediate in mycolic acid synthesis
CIS-METHOXY-MEROACYL-ACP	intermediate in mycolic acid synthesis
CIT	citrate
CITR	citrulline
CITxt	external_citrate
CL	cardiolipin
CMP	cytidine-monophosphate
CO2	carbon_dioxide
CO2xt	external_carbon_dioxide
COA	coenzyme_A
COB-I	coenzyme B12, cob(I)alamin
COB-II	coenzyme B12, cob(II)alamin
COB-III	coenzyme B12, cob(III)alamin
COB-II-RINICACID-A-C-DIAMIDE	cob(II)yrinic acid a,c-diamide
COB-I-RINICACID-A-C-DIAMIDE	cob(I)yrinic acid a,c-diamide
CO-II	Co2+ (cobalt ion)
CO-IIxt	external Co2+ (cobalt ion)
COPROPORPHYRINOGEN-III	coproporphyrinogen_III
CPAD5P	1-(o-carboxyphenylamino)-1'-deoxyribulose-5'-phosphate
CROTONOYLCOA	crotonoyl-CoA
CTP	cytidine-5'-triphosphate
CYCLOPROPYL-MEROACYL-ACP	intermediate in mycolic acid synthesis
CYS	L-cysteine
CYS-NG-INS	desacetylmycothiol_(1-D-myo-inosityl-2-(L-cysteinyl)amido-2-deoxy-¦Á-D-glucopyranoside)
D-3-HYDROXY-C22-ACYL-ACP	intermediate in mycolic acid synthesis
D6PGC	6-phospho-D-gluconate
D6PGL	D-glucono-¦Ä-lactone-6-phosphate
D6RP5P	2,5-diamino-6-(ribosylamino)-4-(3H)-pyrimidinone_5'-phosphate
D8RL	6,7-dimethyl-8-(1-D-ribityl)lumazine
DA	deoxyadenosine
DADP	deoxyadenosine-diphosphate
DAG	1,2-diacylglycerol
DALA	D-alanine
DAPIM	L,L-diaminopimelate
DATP	deoxyadenosine-triphosphate
DB4P	2,5-diamino-6-(ribosylamino)-4-(3H)-pyrimidinone_5'-phosphate
DCDP	deoxycytidine-diphosphate
DCMP	deoxycytidine_monophosphate
DCTP	deoxycytidine-triphosphate
DECANOATE	decanoate
DECANOYL-COA	decanoyl-CoA
DETHIOBIOTIN	dethiobiotin
DGDP	deoxyguanosine-diphosphate
DGLN	D-glutamine
DGLU	D-glutamate
DGLYCERATE	D-glycerate
DGMP	deoxyguanosine-monophosphate
DGTP	deoxyguanosine-triphosphate
DHAP	dihydroxyacetone-phosphate
DHF	7,8-dihydrofolate
DHLIPOYLPROTEIN	enzyme_N6-(dihydrolipoyl)lysine
DHMVA	2,3-dihydroxy-3-methylvalerate
DHN	1,4-dihydroxy-2-naphthoate
DHP	dihydro-neo-pterin
DHPT	7,8-dihydropteroate
DHSK	3-dehydro-shikimate
DIACYLTREHALOSE	diacyltrehalose.
DIHYDRODIPICOLINATE	L-2,3-dihydrodipicolinate
DIHYDROXYMETHYLPENTANOATE	Dihydroxy-methylpentanoate
DIM	dimycocerosate
DIM-CYTO	cytoplasmic_dimycocerosate
DIMGP	D-erythro-imidazole-glycerol-phosphate
DIN	deoxyinosine
DLIPO	dihydrolipoyl
DMK	3-demethylubiquinone-8
DMPP	dimethylallyl-pyrophosphate
DNA	deoxyribonucleic acid
DOCOSANOATE	docosanoate
DOCOSANOYL-ACP	docosanoyl-ACP
DOCOSANOYL-COA	docosanoyl-CoA
DODECANOATE	dodecanoate
DODECANOYL-COA	dodecanoyl-CoA
DOROA	dihydroorotate
DPCOA	dephospho-CoA
DPP	dimethylallyl-pyrophosphate
DPPARA	decaprenylphosphate-arabinose
DPPPR	decaprenylphosphoryl-5-phosphoribose
DPPR	decaprenylphosphoribose
DQT	3-dehydroquinate
DR1P	deoxyribose-1-phosphate
DR5P	deoxyribose-5-phosphate
DT	thymidine
DTDP	deoxythymidine-5'-diphosphate
DTDP4DH6DGLC	dTDP-4-dehydro-6-deoxy-D-glucose
DTDP4DH6DMAN	dTDP-4-dehydro-6-deoxy-L-mannose
DTDPGLC	dTDP-glucose
DTDPRHAM	dTDP-¦Á-L-rhamnose
DTMP	deoxythymidine 5'-phosphate
DTTP	deoxythymidine 5'-triphosphate
DUDP	deoxyuridine-diphosphate
DUMP	deoxyuridine-phosphate
DUTP	deoxyuridine-triphosphate
DX5P	1-deoxy-D-xylulose 5-phosphate
E4P	D-erythrose-4-phosphate
EICOSANOATE	eicosanoate
EICOSANOYL-ACP	eicosanoyl-ACP
EICOSANOYL-COA	eicosanoyl-CoA
ETH	ethanol
F1P	fructose-1-phosphate
F420	coenzyme F420
F420-0	intermediate in coenzyme F420 synthesis
F6P	D-fructose-6-phosphate
FAD	flavin adenine dinucleotide
FADH2	flavin adenine dinucleotide reduced
FDP	fructose-1,6-bisphosphate
FE2	ferrous iron
FE3	ferric iron
FE3xt	external ferric iron
FERI	oxidized ferredoxin
FERO	reduced ferredoxin
FGAM	5-phosphoribosyl-N-formylglycineamidine
FGAR	5'-phosphoribosyl-N-formylglycineamide
FMN	flavin_mononucleotide
FO	intermediate in coenzyme F420 synthesis
FOR	formate
FPP	trans, trans-farnesyl diphosphate
FRU	fructose
FTHF	N10-formyl-THF
FUACAC	4-fumaryl-acetoacetate
FUC1P	¦Â-L-fucose_1-phosphate
FUM	fumarate
G1P	¦Á-D-glucose_1-phosphate
G3P	D-glyceraldehyde-3-phosphate
G6P	¦Â-D-glucose-6-phosphate
GA1P	D-glucosamine-1-phosphate
GA6P	D-glucosamine-6-phosphate
GABA	4-aminobutyrate_(GABA)
GAL1P	¦Á-D-galactose_1-phosphate
GALACTANDPP	galactan-decaprenylphosphate
GAR	5-phospho-ribosyl-glycineamide
GDP	guanosine_diphosphate
GDPDHDOGAL	GDP-4-dehydro-6-L-deoxygalactose
GDPDHDOMAN	GDP-4-dehydro-6-deoxy-D-mannose
GDPFUC	GDP-L-fucose
GDPMAN	guanosine_diphosphate_mannose
GGPP	geranylgeranyl_diphosphate
GL	Glycerol
GL3P	glycerol-3-phosphate
GLAC	D-galactose
GLAL	glycolaldehyde
GLC	¦Â-D-glucose
GLCxt	external_¦Â-D-glucose
GLN	glutamine
GLU	glutamate
GLU1SEMIALD	glutamate-1-semialdehyde
GLUGSAL	L-glutamate_¦Ã-semialdehyde
GLUP	L-glutamate-5-phosphate
GLX	glyoxylate
GLY	glycine
GLYCOLATE	glycolate
GMP	guanosine-monophosphate
GN	guanine
GPP	geranyl-PP
GSN	guanosine
GTP	guanosine-triphosphate
GUAIACOL	guaiacol
H	proton
H2O2	hydrogen_peroxide
H2S	hydrogen_sulfide
H2SO3	sulfurous_acid_
HBA	salicylate_(o-hydroxybenzoic_acid)
HCO3	bicarbonate
HCYS	L-homocysteine
HEME-FE2	heme in ferrous form
HEME-FE3	heme in ferric form
HEMT	4-methyl-5-(¦Â-hydroxyethyl)thiazole
HEPPP	hexaprenyl_diphosphate
HEPTADECANOATE	heptadecanoate
HEPTADECANOYL-ACP	heptadecanoyl-ACP
HEPTADECANOYL-COA	heptadecanoyl-CoA
HEPTANOYL-COA	heptanoyl-CoA
HEXACOSANOATE	hexacosanoate
HEXACOSANOYL-ACP	hexacosanoyl-ACP
HEXACOSANOYL-COA	hexacosanoyl-CoA
HEXACOSANOYL-COA-CO2	hexacosanoyl-CoA-CO2
HEXADECANOATE	hexadecanoate
HEXADECANOYL-ACP	hexadecanoyl-ACP
HEXADECANOYL-COA	hexadecanoyl-COA
HEXADECANOYL-MAS	hexadecanoyl-MAS
HEXANOATE	hexanoate
HEXANOYL-ACP	hexanoyl-ACP
HEXANOYL-COA	hexanoyl-CoA
HIBUT	3-hydroxy-isobutyrate
HIBUTCOA	3-hydroxy-isobutyryl-CoA
HIS	L-histidine
HISOL	histidinol
HISOLP	L-histidinol-phosphate
HMB4PP	1-hydroxy-2-methyl-2-(E)-butenyl_4-diphosphate
HMBUTCOA	3-hydroxybutyryl-CoA
HMGLUTCOA	3-hydroxy-3-methyl-glutaryl-CoA
HOMOGEN	homogentisate
HPPP	hexaprenyl_phosphate
HSER	homoserine
HYDROGENOBYRINATE	hydrogenobyrinate
HYDROGENOBYRINATE-A-C-DIAMIDE	hydrogenobyrinate_a,c_diamide
HYDROXYAKG	D-4-hydroxy-2-keto-glutarate
HYDROXYMETHYLBILANE	hydroxymethylbilane
HYDROXYPHTHIOCERANOYL-COA	hydroxyphthioceranoyl-CoA
HYXN	hypoxanthine
IBUTCOA	isobutyryl-CoA
IBUTLIPO	isobutyryl-lipoamide
ICHOR	isochorismate
ICIT	isocitrate
IDP	inosine_diphosphate
IGP	indole-3-glycerol-phosphate
ILE	L-isoleucine
IMACP	imidazole_acetol-phosphate
IMP	inosine-5'-phosphate
INS	inosine
IP	inositol_phosphate
IPP	¦¤3-isopentenyl-PP
IPPMAL	2-isopropylmalate
ISUCC	iminoaspartate_(¦Á-iminosuccinate)
ITP	inosine_triphosphate
LAC	D-lactate
LACTAL	lactaldehyde
LAM	lipoarabinomannan
LEU	L-leucine
LIPID1	LIPID1 intermediate in peptidoglycan synthesis
LIPID2	LIPID2 intermediate in peptidoglycan synthesis
LIPID2-AMIDATED	LIPID2-AMIDATED
LIPO	lipoamide
LIPOYLPROTEIN	H-protein-(lipoyl)lysine
LLAC	lactate
LLCT	cystathionine
LM	ipomannan
LPPG	2-phospho-lactate
LYS	L-lysine
MAACCOA	MAACCOA
MACAC	4-maleyl-acetoacetate
MACRCOA	methylacrylyl-CoA
MAG	monoacylglycerol
MAHMPPP	4-amino-5-hydroxymethyl-2-methylpyrimidine-pyrophosphate
MAL	malate
MALACP	malonyl-ACP
MALCOA	malonyl-CoA
MAN	mannose
MAN1P	¦Á-D-mannose_1-phosphate
MAN6P	mannose-6-phosphate
MAPC	mycolic_acid¨Carabinogalactan-peptidoglycan_complex
MAS	mycocerosic acids polyketide synthase
MBT	mycobactin
MBTA-HOLO	mycobactinA-HOLO
MBTA-SAL	mycobactinA-SAL
MBTB-HOLO	mycobactinB-HOLO
MBTB-SER	mycobactinB-SER
MBTCD-HBA	mycobactinCD-HBA
MBTCD-HOLO	mycobactinCD-HOLO
MBTE-HOLO	mycobactinE-HOLO
MBTE-LYS	mycobactinE-LYS
MBTF-HOLO	mycobactinF-HOLO
MBTF-LYS	mycobactinF-LYS
MBTSEC	mycobactinSEC
MBTWALL	mycobactinWALL
MDAPIM	meso-diaminopimelate
MDE4P	2-C-methyl-D-erythritol-4-phosphate
MDECPP	2-C-methyl-D-erythritol-2,4-cyclodiphosphate
MEROACYL-AMP	meroacyl-AMP
MET	methionine
METHF	5,10-methenyl-THF
METHYMALONATE	methylmalonate
METTHF	5,10-methylene-THF
MGLUTCOA	3-methylglutaconyl-CoA
MI	myo-inositol
MK	ubiquinone-8
MKH2	ubiquinol-8
MLT	maltose
MO2	molybdenum_ion
MO2xt	external_molybdenum_ion
MOAD-COOH	intermediate in molybdopterin synthesis
MOAD-COSH	intermediate in molybdopterin synthesis
MOLYBDENUM	molybdenum
MOLYBDOPTERIN	molybdopterin
MOLYBDOPTERIN-GDP	molybdopterin_guanine_dinucleotide
MOP	4-methyl-2-oxopentanoate
MPD	mannosyl-?-1-phosphodolichol
MPET	4-methyl-5-(¦Â-hydroxyethyl)thiazole_phosphate
MTHF	5-methyl-THF
MTR1P	5-methylthioribose-1-phosphate
MYCOCEROSOYL-MAS	mycocerosyl-mas enzyme
MYCOLIPANOIC-ACP	mycolipanoic-ACP
MYCOLIPDIENOYL-ACP	mycolipdienoyl-ACP
MYCOLIPENOYL-ACP	mycolipenoyl-ACP
MYCOSIDE_B	mycoside_B
MYCOTHIOL	mycothiol
MYCOTHIONE	mycothione
NAAD	deamido-NAD
NAC	nicotinate
NACD	nicotinate_ribonucleoside
NACN	nicotinate_nucleotide
NAD	nicotinamide_adenine_dinucleotide
NADH	nicotinamide_adenine_dinucleotide_-_reduced
NADP	nicotinamide_adenine_dinucleotide_phosphate
NADPH	Nicotinamide_adenine_dinucleotide_phosphate_-_reduced
NAGA1P	N-acetyl-glucosamine-1-phosphate
NAGDPP	N-acetyl-glucosamine-DPP
NAG-INS	1-D-myo-inosityl-2-acetamido-2-deoxy-¦Á-D-glucopyranoside
NAGLU	N-acetyl-L-glutamate
NAGLUP	N-acetylglutamyl-phosphate
NAGLUS	N-acetyl-L-glutamate_5-semialdehyde
NAM	nicotinamide
NAMD	nicotinamide_riboside
NAMN	nicotinamide_mononucleotide
NAORN	N-acetyl-L-ornithine
NG-INS	glucosaminyl-inositol
NH3	ammonia
NH3xt	external_ammonia
NO2	nitrite
NO2xt	external_nitrite
NO3	nitrate_
NONADECANOATE	nonadecanoate
NONADECANOYL-ACP	nonadecanoyl-ACP
NONADECANOYL-COA	nonadecanoyl-COA
NONANOYL-COA	nonanoyl-COA
NPP	nerylpyrophosphate
NPRAN	N-(5'-phosphoribosyl)-anthranilate
O2	oxygen
O2xt	external_oxygen
OA	oxaloacetate
OAHSER	O-acetyl-L-homoserine
OBUT	2-oxobutanoate
OCTACOSANOYL-ACP	octacosanoyl-ACP
OCTACOSANOYL-COA	octacosanoyl-COA
OCTADECANOATE	octadecanoate
OCTADECANOYL-ACP	octadecanoyl-ACP
OCTADECANOYL-COA	octadecanoyl-CoA
OCTANOYL-COA	octanoyl-CoA
OICAP	(2S)-2-isopropyl-3-oxosuccinate
OMP	orotidine-5'-phosphate
OMVAL	2-keto-3-methyl-valerate
OPP	octaprenyl_diphosphate
ORN	ornithine
OROA	orotate
OSB	O-succinylbenzoate
OSBCOA	O-succinylbenzoyl-CoA
OSLHSER	O-succinyl-L-homoserine
OTHIO	thioredoxin_disulfide
OXOMETHYLPENTANOATE	2-oxo-3-methylpentanoate
P5C	pyrroline_5-carboxylate
PA	L-phosphatidate
PABA	para-aminobenzoic_acid
PANT	L-pantoate
PAP	adenosine_3',5'-bisphosphate
PAPS	3'-phosphoadenylyl-sulfate
PA-TBA	PA-tuberculostearic_acid
PE	L-1-phosphatidyl-ethanolamine
PENTADECANOATE	pentadecanoate
PENTADECANOYL-ACP	pentadecanoyl-ACP
PENTADECANOYL-COA	pentadecanoyl-CoA
PENTA-METHYL-TRICONTANOYL	PENTA-METHYL-TRICONTANOYL
PENTA-METHYL-TRICONTANOYL-COA	PENTA-METHYL-TRICONTANOYL-COA
PENTANOYL-COA	pentanoyl-CoA
PEP	phosphoenolpyruvate
PEPTIDOGLYCAN	peptidoglycan
PG	L-1-phosphatidyl-glycero
PGL-TB	phenolglycolipid_antigen_(PLG-Tb_1)
PGP	L-1-phosphatidylglycerol-phosphate
PHDIM	phthiocerol dimycocerosate
PHDIM-CYTO	cytoplasmic_phthiocerol_dimycocerosate
PHDIMRHAM1	PHDIMRHAM1
PHDIMRHAM2	PHDIMRHAM2
PHE	phenylalanine
PHEN	prephenate
PHENOLPHTHIODIOLONE-A	phenolphthiodiolone A
PHOSPHATIDYLCHOLINE	phosphatidylcholine
PHOSPHO-PENTA-METHYL-TRICONTANOYL-COA	PHOSPHO-PENTA-METHYL-TRICONTANOYL-COA
PHP	3-phospho-hydroxypyruvate
PHPAA-COA	PHPAA-COA
PHPYR	phenylpyruvate
PHSER	O-phospho-L-homoserine
PHTHIODIOLONE-A	phthiodiolone_A
PI	phosphate
PIMELOYL-COA	pimeloyl-CoA
PIMS	phosphatidyl_myo-inositol_mannosides
PI-TBA	PI-tuberculostearic_acid
PIxt	external_phosphate
P-L-GLX	poly-L-glutamate/glutamine (PL-glx) cell wall structure
PNTO	pantothenate
POLYACYLTREHALOSE	polyacyltrehalose
PORPHOBILILOGIN	porphobilinogen
ppGpp	ppGpp
PPI	pyrophosphate
PPM	polyprenolmannose
PPPI	Inorganic_triphosphate
PPPP	PPPP
PPTC	phenolphthiocerol
PPTT	PPTT
PRAM	5-phosphoribosylamine
PRBAMP	phosphoribosylformiminoAICAR-phosphate
PRBATP	5-phosphoribosyl_1-pyrophosphate
PRECORIN-2	precorrin-2
PRECORIN-3A	precorrin-3A
PRECORIN-3B	precorrin-3B
PRECORIN-4B	precorrin-4B
PRECORIN-5	precorrin-5
PRECORIN-6X	precorrin-6x
PRECORIN-6Y	precorrin-6y
PRECORIN-8X	precorrin-8x
PRECURSOR-Z	precursor-Z
PRFICA	phosphoribosyl-formamido-carboxamide
PRFP	phosphoribosylformiminoAICAR-phosphate
PRLP	phosphoribulosylformimino-AICAR-P
PRO	proline
PROPANOATE	propanoate
PROPIONYLACP	propionyl-ACP
PROPIONYLCOA	propionyl-CoA
PROPIONYLP	propionyl-P
PROTEIN	average_mycobacterial_protein
PROTOHEME-FE2	protoheme
PROTOPORPHYRIN-IX	protoporphyrin_IX
PROTOPORPHYRINOGEN	protoporphyrinogen_IX
PRPP	5-phosphoribosyl_1-pyrophosphate
PS	phosphatidylserine
PTC	phthiocerol
PTHIOCERANOYL-COA	phthioceranoyl-COA
PTRSC	putrescine
PTT	PTT
PURI5P	pseudouridine_5'-phosphate
PYR	pyruvate
QA	quinolinate
R1P	ribose-1-phosphate
R5P	D-ribose-5-phosphate
RHAMNAGDPP	Rha-GlcNAc-DPP
RHYDROXYBUTANOYL	(R)-3-Hydroxybutanoyl
RIB	Ribose
RIBFLAV	riboflavin
RL5P	D-ribulose-5-phosphate
RMMALONYLACP	(R)-methylmalonyl-ACP
RMMALONYLCOA	(R)-methylmalonyl-CoA
RNA	ribonucleic_acid
RTHIO	reduced_thioredoxin
S7P	D-sedoheptulose-7-phosphate
SAH	S-adenosyl-L-homocysteine
SAICAR	5'-phosphoribosyl-4-(N-succinocarboxamide)-5-aminoimidazole
SAL	salicylate
SAM	S-adenosyl-L-methionine
SAM-2-OXOBUTANOATE	S-adenosyl-4-methylthio-2-oxobutanoate
SAOPIM	N-succinyl-2-amino-6-ketopimelate
SAP	H-protein-S-(aminomethyldihydrolipoyl)lysine
SDAPIM	N-succinyl-L,L-2,6-diaminopimelate
SER	serine
SHCHC	2-succinyl-6-hydroxy-2,4-cyclohexadiene-1-carboxylate
SL-1	sulfolipid-1
SL1278-CYTO	cyptoplasmic_SL1278_(SL-1_precursor)
SL1278-WALL	wallbound_SL1278_(SL-1_precursor)
SLF	sulfate
SLFxt	external_sulfate
SMALLMOLECULES	small_molecules
SME	shikimate
SME3P	shikimate-3-phosphate
SMMALONYLCOA	(S)-methyl-malonyl-CoA
SPRMD	spermidine
SUC	sucrose
SUCC	succinate
SUCCOA	succinyl-CoA
SUCCSAL	succinate_semialdehyde_(succinic_semialdehyde)
SUGARS	sugars
T3	D-glyceraldehyde-3-phosphate
TAG	triacylglycerol
TETRACOSANOATE	tetracosanoate
TETRACOSANOYL-ACP	tetracosanoyl-ACP
TETRACOSANOYL-COA	tetracosanoyl-CoA
TETRADECANOATE	tetradecanoate_
TETRADECANOYL-ACP	tetradecanoyl-ACP
TETRADECANOYL-COA	tetradecanoyl-CoA
TETRAHYDRODIPICOLINATE	tetrahydrodipicolinate
THF	tetrahydrofolate
THFG	THF-L-glutamate
THI	thiamine
THIP	thiamine-phosphate
THPTGLU	tetrahydropteroyltri-L-glutamate
THR	threonine
TRANS-DELTA-2-DODECANOYL-COA	TRANS-DELTA-2-DODECANOYL-COA
TRANS-DELTA-2-ENOYL-C22-ACYL-ACP	TRANS-DELTA-2-ENOYL-C22-ACYL-ACP
TRANS-DELTA-2-HYDROXY-DODECANOYL-COA	TRANS-DELTA-2-HYDROXY-DODECANOYL-COA
TRANS-KETO-MEROACYL-ACP	TRANS-KETO-MEROACYL-ACP
TRANS-METHOXY-MEROACYL-ACP	TRANS-METHOXY-MEROACYL-ACP
TRE	trehalose
TRE6P	trehalose_6-phosphate
TREHALOSEDIMYCOLATE	trehalosedimycolate_(TDM)
TREHALOSEMONOMYCOLATE	trehalosemonomycolate_(TMM)
TREHALOSEMONOMYCOLATEbrCYbr	cytoplasmic_trehalosemonomycolate_(TMM)
TREHALOSEMONOMYCOLATE-P	cytoplasmic_trehalosemonomycolate-P
TRE-S	sulfated_trehalose
TRIDECANOYL-COA	tridecanoyl-CoA
TRNA-GLU	tRNAGlu
TRP	tryptophan
TS-COSH-TYR	L-tyrosine/ThiS-COSH_complex
TS-PROTEIN	ThiS_protein/C1of_Tyrosine,_4hydroxybenzyl_alcohol_complex
TUBERCULOSTEROYL-ACP	Tuberculostearic acid (TBSA)
TYR	tyrosine
UDP	uridine-diphosphate
UDPbrNAM:NGMbrAGMDAPIM	UDP[NAM:NGM]AGMDAPIM
UDPbrNAM:NGMbrAGMDAPIMAA	UDP[NAM:NGM]AGMDAPIMAA
UDPbrNAM:NGMbrALA	UDP[NAM:NGM]ALA
UDPbrNAM:NGMbrALAGLU	UDP[NAM:NGM]ALAGLU
UDPG	UDP-D-glucose
UDPGAL	UDP-galactose
UDPGALF	UDP-D-galacto-1,4-furanose
UDPNAG	UDP-N-acetyl-D-glucosamine
UDPNAGPEE	UDP-GlcNAc-pyruvate_enol_ether
UDPNAM	UDP-N-acetylmuramate
UDPNGM	UDPNGM
UMP	uridine-monophosphate
UNDECANOYL-COA	undecanoyl-CoA
URA	uracil
UREA	urea
UROPORPHYRINOGEN-III	uroporphyrinogen-III
UTP	uridine-triphosphate
VAL	valine
X5P	D-xylulose-5-phosphate
XAN	xanthine
XMP	xanthosine-5-phosphate
XTSINE	xanthosine
UREA	urea
UROPORPHYRINOGEN_III	uroporphyrinogen-III
UTP	uridine-triphosphate
VAL	valine
X5P	D-xylulose-5-phosphate
XAN	xanthine
XMP	xanthosine-5-phosphate
XTSINE	xanthosine

## Sheet: media
Exchange reaction	Glucose medium		Glycerol medium		Comment
	Uptake bound	Secrete bound	Uptake bound	Secrete bound
R_EX_9_HEXADECENOATE	0	10	0	10	#
R_EX_9_OCTADECENOATE	0	10	0	10	#
R_EX_AC	0	10	0	10	#acetate
R_EX_ACAL	0	10	0	10	#acetaldehyde
R_EX_AD	-10	10	-10	10	#adenine
R_EX_ADN	0	10	0	10	#adenosine
R_EX_AKG	0	10	0	10	#ketoglutarate
R_EX_ALA	0	10	0	10	#D-alanine
R_EX_AN	0	10	0	10	#anthranilate
R_EX_ARG	0	10	0	10	#L-arginine
R_EX_ASN	0	10	0	10	#L-asparagine
R_EX_ASP	0	10	0	10	#L-aspartate
R_EX_BIOTIN	0	10	0	10	#biotin
R_EX_CADA	0	10	0	10	#cadaverine
R_EX_CELB	0	10	0	10	#cellobiose
R_EX_CHOLESTEROL	0	10	0	10	#
R_EX_CIT	0	10	0	10	#citrate
R_EX_CITR	0	10	0	10	#citrulline
R_EX_CO_II	0	10	0	10	#
R_EX_CO2	0	10	0	10	#carbon_dioxide
R_EX_CYS	0	10	0	10	#L-cysteine
R_EX_DA	0	10	0	10	#deoxyadenosine
R_EX_DALA	0	10	0	10	#D-alanine
R_EX_DAPIM	-10	10	-10	10	#L,L-diaminopimelate
R_EX_DC	0	10	0	10	#
R_EX_DGLU	0	10	0	10	#D-glutamate
R_EX_DIN	0	10	0	10	#deoxyinosine
R_EX_DODECANOATE	0	10	0	10	#dodecanoate
R_EX_DT	0	10	0	10	#thymidine
R_EX_DU	0	10	0	10	#
R_EX_EICOSANOATE	0	10	0	10	#eicosanoate
R_EX_ELECTROPHILE_X	0	10	0	10	#
R_EX_ETH	0	10	0	10	#ethanol
R_EX_FE3	-10	10	-10	10	#ferric iron
R_EX_FOR	0	10	0	10	#formate
R_EX_FRU	0	10	0	10	#fructose
R_EX_FUM	0	10	0	10	#fumarate
R_EX_GABA	0	10	0	10	#4-aminobutyrate_(GABA)
R_EX_GL	0	10	-10	10	#Glycerol
R_EX_GL3P	0	10	0	10	#glycerol-3-phosphate
R_EX_GLAC	0	10	0	10	#D-galactose
R_EX_GLC	-10	10	0	10	#D-glucose
R_EX_GLN	0	10	0	10	#glutamine
R_EX_GLU	0	10	0	10	#glutamate
R_EX_GLUC	0	10	0	10	#
R_EX_GLY	-10	10	-10	10	#glycine
R_EX_GLYCOLATE	0	10	0	10	#glycolate
R_EX_GLYN	0	10	0	10	#
R_EX_GN	0	10	0	10	#guanine
R_EX_GSN	0	10	0	10	#guanosine
R_EX_H2X	0	10	0	10	#
R_EX_HEPTADECANOATE	0	10	0	10	#heptadecanoate
R_EX_HEXACOSANOATE	0	10	0	10	#hexacosanoate
R_EX_HEXADECANOATE	0	10	0	10	#hexadecanoate
R_EX_HEXANOATE	0	10	0	10	#hexanoate
R_EX_HIS	0	10	0	10	#L-histidine
R_EX_HYXN	0	10	0	10	#hypoxanthine
R_EX_ILE	0	10	0	10	#L-isoleucine
R_EX_INS	0	10	0	10	#inosine
R_EX_LAC	0	10	0	10	#D-lactate
R_EX_LEU	0	10	0	10	#L-leucine
R_EX_LLAC	0	10	0	10	#lactate
R_EX_LYS	0	10	0	10	#L-lysine
R_EX_MAL	0	10	0	10	#malate
R_EX_MAN	0	10	0	10	#mannose
R_EX_MET	-10	10	-10	10	#methionine
R_EX_MLT	0	10	0	10	#maltose
R_EX_MO2	0	10	0	10	#molybdenum_ion
R_EX_N_ACETYL_S_CONJUGATE	0	10	0	10	#
R_EX_NAC	0	10	0	10	#nicotinate
R_EX_NH3	0	10	0	10	#ammonia
R_EX_NO2	0	10	0	10	#nitrite
R_EX_NO3	0	10	0	10	#nitrate
R_EX_NONADECANOATE	0	10	0	10	#nonadecanoate
R_EX_O2	-10	10	-10	10	#oxygen
R_EX_ORN	0	10	0	10	#ornithine
R_EX_PENTADECANOATE	0	10	0	10	#pentadecanoate
R_EX_PHE	0	10	0	10	#phenylalanine
R_EX_PHOSPHATIDYLCHOLINE	0	10	0	10	#phosphatidylcholine
R_EX_PI	0	10	0	10	#phosphate
R_EX_PRO	0	10	0	10	#proline
R_EX_PROPANOATE	0	10	0	10	#propanoate
R_EX_PYR	0	10	0	10	#pyruvate
R_EX_RIB	0	10	0	10	#Ribose
R_EX_SER	0	10	0	10	#serine
R_EX_SLF	0	10	0	10	#sulfate
R_EX_SUC	0	10	0	10	#sucrose
R_EX_SUCC	0	10	0	10	#succinate
R_EX_T3	-10	10	-10	10	#D-glyceraldehyde-3-phosphate
R_EX_TAG	0	10	0	10	#triacylglycerol
R_EX_TETRACOSANOATE	0	10	0	10	#tetracosanoate
R_EX_TETRADECANOATE	0	10	0	10	#tetradecanoate
R_EX_THR	0	10	0	10	#threonine
R_EX_TRE	0	10	0	10	#trehalose
R_EX_TRP	0	10	0	10	#tryptophan
R_EX_TYR	0	10	0	10	#tyrosine
R_EX_URA	0	10	0	10	#uracil
R_EX_UREA	0	10	0	10	#urea
R_EX_URI	0	10	0	10	#
R_EX_VAL	0	10	0	10	#valine
R_EX_XAN	0	10	0	10	#xanthine

## Sheet: FVA
Reaction	Glucose medium			Glycerol medium
	Min	Max	Activity	Min	Max	Activity
R1	0	0.000240943	UND	0.999655	1.00024	ACTIVE
R10	0	0	INACT	0	0	INACT
R100	-10	-1.51398	ACTIVE	-10	-1.12968	ACTIVE
R101	1.48273	1.51665	ACTIVE	0.860689	0.894988	ACTIVE
R102	0	0.00584985	UND	0	0.00591071	UND
R103	0	0.145624	UND	0	0.146118	UND
R104	0	0	INACT	0	0	INACT
R105	0	0	INACT	0	0	INACT
R106	0.0060618	0.00681338	ACTIVE	0.00441378	0.00517077	ACTIVE
R107	0.0060618	0.00681338	ACTIVE	0.00441378	0.00517077	ACTIVE
R108	0.00165932	0.00166181	ACTIVE	0.00123835	0.00124085	ACTIVE
R109	0	0	INACT	0	0	INACT
R11	-0.00965062	-0.00964946	ACTIVE	-0.00720603	-0.00720487	ACTIVE
R110	0	0	INACT	0	0	INACT
R111	0	0	INACT	0	0	INACT
R112	0	0	INACT	0	0	INACT
R113	0	0	INACT	0	0	INACT
R114	0	0	INACT	0	0	INACT
R119	3.73982	3.82679	ACTIVE	3.22432	3.31171	ACTIVE
R12	-0.00965062	-0.00964946	ACTIVE	-0.00720603	-0.00720487	ACTIVE
R120	0	0.0063609	UND	0	0.006431	UND
R121	0	0.0063609	UND	0	0.006431	UND
R122	1.41504	1.51045	ACTIVE	0.924979	1.02088	ACTIVE
R123	-0.734213	-0.711949	ACTIVE	-0.554009	-0.531499	ACTIVE
R124	9.52554e-05	9.52669e-05	ACTIVE	7.11235e-05	7.1135e-05	ACTIVE
R125	5.24055	5.28267	ACTIVE	4.23554	4.24694	ACTIVE
R126	5.23817	5.2827	ACTIVE	4.23281	4.24696	ACTIVE
R127	0	0.0063609	UND	0	0.006431	UND
R128	11.5101	11.5991	ACTIVE	9.88685	9.96155	ACTIVE
R129	1	1.0001	ACTIVE	1	1.0001	ACTIVE
R13	0.00964946	0.00965062	ACTIVE	0.00720487	0.00720603	ACTIVE
R130	0	0.0254436	UND	0	0.025724	UND
R131	2.28833	2.32226	ACTIVE	1.70144	1.73574	ACTIVE
R132	0	1.00984	UND	0	0.00857374	UND
R133	0	0.00254643	UND	0	0.00257395	UND
R134	0.00348552	0.00552905	ACTIVE	0.0026025	0.00446464	ACTIVE
R135	0	0.0063609	UND	0	0.006431	UND
R136	0	0.0063609	UND	0	0.006431	UND
R137	0	0.0063609	UND	0	0.006431	UND
R138	0	0.0063609	UND	0	0.006431	UND
R139	0	0.00177314	UND	0	0.00179235	UND
R14	0.00599483	0.00599555	ACTIVE	0.0044761	0.00447683	ACTIVE
R140	0	0.00177314	UND	0	0.00179235	UND
R141	0	0.00177314	UND	0	0.00179235	UND
R142	0	0.0063609	UND	0	0.006431	UND
R143	0	0.0036348	UND	0	0.00367486	UND
R144	0	0.0162873	UND	0	0.0138427	UND
R145	0.0123372	0.0123386	ACTIVE	0.00921166	0.00921315	ACTIVE
R146	4.14154e-05	4.14204e-05	ACTIVE	3.09232e-05	3.09282e-05	ACTIVE
R147	4.14154e-05	4.14204e-05	ACTIVE	3.09232e-05	3.09282e-05	ACTIVE
R148	0	0	INACT	0	0	INACT
R149	0	0.000557356	UND	0	0.000563531	UND
R15	0	0	INACT	0	0	INACT
R150	0	0.00162573	UND	0	0.00164393	UND
R151	0	0.00162573	UND	0	0.00164393	UND
R152	0	0.00162573	UND	0	0.00164393	UND
R153	0	0.00162573	UND	0	0.00164393	UND
R154	0	0.00162573	UND	0	0.00164393	UND
R155	0	0.00162573	UND	0	0.00164393	UND
R156	0.00155563	8.48758	ACTIVE	0.00116153	8.87149	ACTIVE
R157	0	0	INACT	0	0	INACT
R158	0	0	INACT	0	0	INACT
R159	0	0	INACT	0	0	INACT
R16	0	0	INACT	0	0	INACT
R160	0	0	INACT	0	0	INACT
R161	0	0	INACT	0	0	INACT
R162	0	0	INACT	0	0	INACT
R163	0	0	INACT	0	0	INACT
R164	0	0	INACT	0	0	INACT
R165	0	0	INACT	0	0	INACT
R166	0	0.0084812	UND	0	0.00857467	UND
R167	-0.0084812	0	UND	-0.00857467	0	UND
R168	0	0.000557356	UND	0	0.000563531	UND
R169	0	0.000557356	UND	0	0.000563531	UND
R17	0	0	INACT	0	0	INACT
R170	0	0.000557356	UND	0	0.000563531	UND
R171	0	0.000557356	UND	0	0.000563531	UND
R172	0	0.000557356	UND	0	0.000563531	UND
R173	0	0.000557356	UND	0	0.000563531	UND
R174	0	0.000557356	UND	0	0.000563531	UND
R175	0	0.0063609	UND	0	0.006431	UND
R176	0.00149924	0.00149942	ACTIVE	0.00111942	0.0011196	ACTIVE
R177	0	0.0036348	UND	0	0.00367486	UND
R178	0	0	INACT	0	0	INACT
R179	0	0	INACT	0	0	INACT
R18	0	0	INACT	0	0	INACT
R180	0	0	INACT	0	0	INACT
R181	0	9.99673	UND	0	9.99756	UND
R182	0	0.0063609	UND	0	0.006431	UND
R183	0	0.00115653	UND	0	0.00116927	UND
R184	0.422629	0.495627	ACTIVE	0.423537	0.496784	ACTIVE
R185	-0.485203	-0.41231	ACTIVE	-0.489064	-0.415926	ACTIVE
R186	0.422629	0.495627	ACTIVE	0.423537	0.496784	ACTIVE
R186b	0	0.145624	UND	0	0.146118	UND
R187	0.422629	0.495627	ACTIVE	0.423537	0.496784	ACTIVE
R188	0	0.475741	UND	0	0.483681	UND
R189	9.9397e-05	0.0100825	ACTIVE	7.42158e-05	0.00920977	ACTIVE
R19	0	0	INACT	0	0	INACT
R190	-10	9.99669	UND	-10	9.99753	UND
R191	0	0	INACT	0	0	INACT
R192	0	0	INACT	0	0	INACT
R193	0	0	INACT	0	0	INACT
R194	0	0	INACT	0	0	INACT
R195	-10	9.99539	UND	-10	9.99656	UND
R196	0	0.0063609	UND	0	0.006431	UND
R197	-9.82798	9.94211	UND	-9.87156	9.95868	UND
R198	-9.77008	10	UND	-9.83023	10	UND
R199	0	0.0162873	UND	0	0.0138427	UND
R20	0.00413491	0.00413541	ACTIVE	0.00308738	0.00308788	ACTIVE
R200	0	0.0162873	UND	0	0.0138427	UND
R201	0.00992644	0.0162873	ACTIVE	0.00741168	0.0138427	ACTIVE
R202	0.00496322	0.00814367	ACTIVE	0.00370584	0.00692134	ACTIVE
R203	0	0	INACT	0	0	INACT
R204	0.0123786	0.0286659	ACTIVE	0.00924259	0.0230853	ACTIVE
R205	0.0123786	0.0286659	ACTIVE	0.00924259	0.0230853	ACTIVE
R206	0.0123786	0.0286659	ACTIVE	0.00924259	0.0230853	ACTIVE
R207	0.0123786	0.0286659	ACTIVE	0.00924259	0.0230853	ACTIVE
R208	0.0193082	0.0193105	ACTIVE	0.0144167	0.014419	ACTIVE
R209	0.0123372	0.015972	ACTIVE	0.00921166	0.0128865	ACTIVE
R21	0.00610313	0.00973793	ACTIVE	0.00455697	0.00823183	ACTIVE
R210	0.0123372	0.015972	ACTIVE	0.00921166	0.0128865	ACTIVE
R211	0.0321826	0.032397	ACTIVE	0.0240295	0.0242463	ACTIVE
R212	0.0321826	0.032397	ACTIVE	0.0240295	0.0242463	ACTIVE
R213	0.0321826	0.032397	ACTIVE	0.0240295	0.0242463	ACTIVE
R214	0.0147479	0.0149623	ACTIVE	0.0110116	0.0112285	ACTIVE
R215	0	0.00524792	UND	0	0.00434847	UND
R216	0.00689533	0.00852107	ACTIVE	0.00514847	0.0067924	ACTIVE
R217	0.00689533	0.00852107	ACTIVE	0.00514847	0.0067924	ACTIVE
R218	0.00689533	0.00852107	ACTIVE	0.00514847	0.0067924	ACTIVE
R219	0.00689533	0.00745269	ACTIVE	0.00514847	0.005712	ACTIVE
R22	0.00155563	0.00155582	ACTIVE	0.00116153	0.00116171	ACTIVE
R220	0.0159355	0.0161067	ACTIVE	0.0118984	0.0120715	ACTIVE
R221	0.0159355	0.0161067	ACTIVE	0.0118984	0.0120715	ACTIVE
R222	0.0159355	0.0161067	ACTIVE	0.0118984	0.0120715	ACTIVE
R223	0.0159355	0.0161067	ACTIVE	0.0118984	0.0120715	ACTIVE
R224	0.0159355	0.0161067	ACTIVE	0.0118984	0.0120715	ACTIVE
R225	0.0510198	0.057383	ACTIVE	0.0380939	0.0445272	ACTIVE
R226	0.00377559	0.0074104	ACTIVE	0.00281909	0.00649395	ACTIVE
R227	0.0134755	0.0151035	ACTIVE	0.010061	0.0117072	ACTIVE
R228	0.0134755	0.0151035	ACTIVE	0.010061	0.0117072	ACTIVE
R229	0.0134755	0.0151035	ACTIVE	0.010061	0.0117072	ACTIVE
R23	0.00155563	0.00155582	ACTIVE	0.00116153	0.00116171	ACTIVE
R230	0.00985554	0.0151035	ACTIVE	0.00735874	0.0117072	ACTIVE
R231	0.00985554	0.0151035	ACTIVE	0.00735874	0.0117072	ACTIVE
R232	0	0.000177553	UND	0	0.000179517	UND
R233	0	8.87767e-05	UND	0	8.97585e-05	UND
R234	0	0.000177553	UND	0	0.000179517	UND
R235	0	0.000177553	UND	0	0.000179517	UND
R236	0	0.000177553	UND	0	0.000179517	UND
R237	0.00753866	0.0160199	ACTIVE	0.00562882	0.0142035	ACTIVE
R238	0.00340375	0.011885	ACTIVE	0.00254145	0.0111161	ACTIVE
R239	0	0.00524792	UND	0	0.00434847	UND
R24	0	0.00492244	UND	0	0.00428687	UND
R240	0	0.00524792	UND	0	0.00434847	UND
R241	0	0.475741	UND	0	0.483681	UND
R242	0	0.00231306	UND	0	0.00233855	UND
R243	0	0	INACT	0	0	INACT
R244	0	0	INACT	0	0	INACT
R245	0.00165932	0.00166181	ACTIVE	0.00123835	0.00124085	ACTIVE
R246	0.0358654	0.0358697	ACTIVE	0.0267793	0.0267836	ACTIVE
R247	0	0.0063609	UND	0	0.006431	UND
R248	0	0.0063609	UND	0	0.006431	UND
R249	0	0.0063609	UND	0	0.006431	UND
R25	0	0	INACT	0	0	INACT
R250	0	0.0063609	UND	0	0.006431	UND
R251	0	0.0063609	UND	0	0.006431	UND
R252	0	0.00524792	UND	0	0.00434847	UND
R253	0	0.00524792	UND	0	0.00434847	UND
R254	0	0.00524792	UND	0	0.00434847	UND
R255	0	0.00524792	UND	0	0.00434847	UND
R256	0	0.00524792	UND	0	0.00434847	UND
R257	0.00327314	0.479014	ACTIVE	0.00244393	0.486125	ACTIVE
R258	0.00327314	10	ACTIVE	0.00244393	10	ACTIVE
R259	0.00507556	0.00738861	ACTIVE	0.00378972	0.00612827	ACTIVE
R26	0	0	INACT	0	0	INACT
R260	0.00493475	0.0072478	ACTIVE	0.00368458	0.00602313	ACTIVE
R261	0.00368696	0.00389874	ACTIVE	0.00275291	0.00296238	ACTIVE
R262	0.00368696	0.00389874	ACTIVE	0.00275291	0.00296238	ACTIVE
R263	0.00368696	0.00389874	ACTIVE	0.00275291	0.00296238	ACTIVE
R264	0.00368696	0.00389874	ACTIVE	0.00275291	0.00296238	ACTIVE
R265	0.00368696	0.00389874	ACTIVE	0.00275291	0.00296238	ACTIVE
R266	0.00368696	0.00389874	ACTIVE	0.00275291	0.00296238	ACTIVE
R267	0.00368696	0.00389874	ACTIVE	0.00275291	0.00296238	ACTIVE
R268	0.00368696	0.00389874	ACTIVE	0.00275291	0.00296238	ACTIVE
R269	0.00368696	0.00389874	ACTIVE	0.00275291	0.00296238	ACTIVE
R27	0.00196822	0.00560302	ACTIVE	0.00146959	0.00514445	ACTIVE
R270	0.0108681	0.010877	ACTIVE	0.00811478	0.00812089	ACTIVE
R271	0.0108681	0.010877	ACTIVE	0.00811478	0.00812089	ACTIVE
R272	0.0108681	0.010877	ACTIVE	0.00811478	0.00812089	ACTIVE
R273	0.0108681	0.010877	ACTIVE	0.00811478	0.00812089	ACTIVE
R274	0.0108681	0.010877	ACTIVE	0.00811478	0.00812089	ACTIVE
R275	0.0108681	0.010877	ACTIVE	0.00811478	0.00812089	ACTIVE
R276	0.0108681	0.010877	ACTIVE	0.00811478	0.00812089	ACTIVE
R277	0.0023398	0.00234009	ACTIVE	0.00174704	0.00174732	ACTIVE
R278	0.0023398	0.00234009	ACTIVE	0.00174704	0.00174732	ACTIVE
R279	0.0023398	0.00234009	ACTIVE	0.00174704	0.00174732	ACTIVE
R28	0	0.00773526	UND	0	0.00673651	UND
R280	0.0023398	0.00234009	ACTIVE	0.00174704	0.00174732	ACTIVE
R281	0.0023398	0.00234009	ACTIVE	0.00174704	0.00174732	ACTIVE
R282	0.00792343	0.00793233	ACTIVE	0.00591611	0.00592223	ACTIVE
R283	0.00460871	0.00460926	ACTIVE	0.00344114	0.00344169	ACTIVE
R284	-9.99539	10	UND	-9.99656	10	UND
R285	0.00331472	0.00332362	ACTIVE	0.00247497	0.00248109	ACTIVE
R286	-9.99669	10	UND	-9.99753	10	UND
R287	0.101347	0.10983	ACTIVE	0.0755587	0.084135	ACTIVE
R288	0.00697104	0.00697188	ACTIVE	0.005205	0.00520584	ACTIVE
R289	0.00697104	0.00697188	ACTIVE	0.005205	0.00520584	ACTIVE
R29	0	0.00773526	UND	0	0.00673651	UND
R290	0.00697104	0.00697188	ACTIVE	0.005205	0.00520584	ACTIVE
R291	0.00697104	0.00697188	ACTIVE	0.005205	0.00520584	ACTIVE
R292	0.00697104	0.00697188	ACTIVE	0.005205	0.00520584	ACTIVE
R293	0.0112438	0.0112451	ACTIVE	0.00839529	0.00839665	ACTIVE
R294	0.0204668	0.0245366	ACTIVE	0.0152818	0.0192814	ACTIVE
R295	0	0.00506015	UND	0	0.00377837	UND
R296	0	0.00506015	UND	0	0.00377837	UND
R297	0	0.00294874	UND	0	0.0022018	UND
R298	0	0.00236981	UND	0	0.0022015	UND
R299	0.00193344	0.00600324	ACTIVE	0.00144362	0.00544328	ACTIVE
R30	-0.00773526	-0.00410046	ACTIVE	-0.00673651	-0.00306165	ACTIVE
R300	0	0.00101511	UND	0	0.000757975	UND
R301	0.00101501	0.00101513	ACTIVE	0.000757867	0.000757989	ACTIVE
R302	-0.00534589	0.00101513	UND	-0.00567314	0.000757989	UND
R303	0	0.0063609	UND	0	0.006431	UND
R304	0.00101501	0.00101513	ACTIVE	0.000757867	0.000757989	ACTIVE
R305	0.00115284	0.00115298	ACTIVE	0.000860779	0.000860919	ACTIVE
R306	0.00640819	0.00742409	ACTIVE	0.00478474	0.0055435	ACTIVE
R307	0.00935663	0.00935776	ACTIVE	0.00698623	0.00698736	ACTIVE
R308	0	0.0036348	UND	0	0.00367486	UND
R309	0	0.0036348	UND	0	0.00367486	UND
R31	0	0.0036348	UND	0	0.00367486	UND
R310	0.00589689	0.0058976	ACTIVE	0.00440298	0.00440369	ACTIVE
R311	0	10	UND	0	10	UND
R312	0	10	UND	0	10	UND
R313	0.00237484	0.00275485	ACTIVE	0.00166087	0.00204218	ACTIVE
R314	0.00237484	0.00275485	ACTIVE	0.00166087	0.00204218	ACTIVE
R315	0.00237484	0.00275485	ACTIVE	0.00166087	0.00204218	ACTIVE
R316	0.00237484	0.00275485	ACTIVE	0.00166087	0.00204218	ACTIVE
R317	0.00237484	0.00275485	ACTIVE	0.00166087	0.00204218	ACTIVE
R318	0	0.000371571	UND	0	0.000375688	UND
R319	0	0.000371571	UND	0	0.000375688	UND
R32	0.00537986	0.00538876	ACTIVE	0.00401693	0.00402304	ACTIVE
R320	0	0.000371571	UND	0	0.000375688	UND
R321	0.00368696	0.00405854	ACTIVE	0.00275291	0.0031286	ACTIVE
R322	0.00368696	0.00405854	ACTIVE	0.00275291	0.0031286	ACTIVE
R323	0	0.0036348	UND	0	0.00367486	UND
R324	0	0.0036348	UND	0	0.00367486	UND
R325	0	0.0036348	UND	0	0.00367486	UND
R326	0	0.0036348	UND	0	0.00367486	UND
R327	0	0.0036348	UND	0	0.00367486	UND
R328	-9.9929	9.99898	UND	-9.9947	9.99924	UND
R329	0	0.00101513	UND	0	0.000757989	UND
R33	0	1.00984	UND	0	0.00857374	UND
R330	0	0.00101513	UND	0	0.000757989	UND
R331	0	4.14204e-05	UND	0	3.09282e-05	UND
R332	0	4.14204e-05	UND	0	3.09282e-05	UND
R333	0	0.0084812	UND	0	0.00857467	UND
R334	0	0	INACT	0	0	INACT
R335	0.00303775	0.00704412	ACTIVE	0.00216991	0.00622046	ACTIVE
R336	0	0	INACT	0	0	INACT
R337	0	0.00704412	UND	0	0.00622046	UND
R338	-0.00694472	0.000101678	UND	-0.00614625	7.65218e-05	UND
R338b	9.9397e-05	0.000101678	ACTIVE	7.42158e-05	7.65218e-05	ACTIVE
R339	-0.00704412	0	UND	-0.00622046	0	UND
R34	0	0.00773526	UND	0	0.00673651	UND
R340	0.726288	0.738362	ACTIVE	0.540048	0.551328	ACTIVE
R341	0	0	INACT	0	0	INACT
R342	0	0.0381654	UND	0	0.00771721	UND
R343	0	0.0381654	UND	0	0.00771721	UND
R344	0	0.00704412	UND	0	0.00622046	UND
R345	0	0.00704412	UND	0	0.00622046	UND
R346	0	0.0036348	UND	0	0.00367486	UND
R347	0	0.000686044	UND	0	0.000693604	UND
R348	0	0.000686044	UND	0	0.000693604	UND
R349	0	0.0036348	UND	0	0.00367486	UND
R35	0	1.00984	UND	0	0.00857374	UND
R350	0	0.0036348	UND	0	0.00367486	UND
R351	2.99072	2.9992	ACTIVE	2.23272	2.2413	ACTIVE
R351b	0.731222	0.742017	ACTIVE	0.543733	0.554646	ACTIVE
R352	0	0.00101513	UND	0	0.000757989	UND
R353	0	0.00101508	UND	0	0.000757953	UND
R354	-9.99189	10	UND	-9.99394	10	UND
R355	0.00709628	0.00710518	ACTIVE	0.00529851	0.00530463	ACTIVE
R356	0.00709628	0.00710518	ACTIVE	0.00529851	0.00530463	ACTIVE
R357	-9.99189	10	UND	-9.99394	10	UND
R358	-1.50184	-1.46792	ACTIVE	-0.883928	-0.849629	ACTIVE
R359	0.00193344	0.00193367	ACTIVE	0.00144362	0.00144385	ACTIVE
R36	0	0.00773526	UND	0	0.00673651	UND
R361	0.00193344	0.00556824	ACTIVE	0.00144362	0.00511848	ACTIVE
R362	0	0.00980351	UND	0	0.00900146	UND
R363	0	0.0039214	UND	0	0.00360059	UND
R364	0.00344261	0.00344302	ACTIVE	0.00257046	0.00257087	ACTIVE
R365	0.00344261	0.00344302	ACTIVE	0.00257046	0.00257087	ACTIVE
R366	0	0	INACT	0	0	INACT
R367	0	0	INACT	0	0	INACT
R368	0.00344261	0.00344302	ACTIVE	0.00257046	0.00257087	ACTIVE
R369	0	0.00344302	UND	0	0.00257087	UND
R37	-9.01711	10	UND	-10	9.99999	UND
R370	0	0.00344302	UND	0	0.00257087	UND
R371	0	0	INACT	0	0	INACT
R372	0	0	INACT	0	0	INACT
R373	0	0	INACT	0	0	INACT
R374	0	0	INACT	0	0	INACT
R375	0	0.0036348	UND	0	0.00367486	UND
R376	-10	7.89034	UND	-10	8.3114	UND
R377	0.00856089	0.0149218	ACTIVE	0.00639208	0.0128231	ACTIVE
R378	0	0.0063609	UND	0	0.006431	UND
R379	0	10	UND	0	10	UND
R38	0.00624096	0.00987577	ACTIVE	0.00465988	0.00833474	ACTIVE
R380	0	0.0036348	UND	0	0.00367486	UND
R381	0.00179329	0.00180219	ACTIVE	0.00133898	0.00134509	ACTIVE
R382	0.00179329	0.00180219	ACTIVE	0.00133898	0.00134509	ACTIVE
R383	0.00179329	0.00180219	ACTIVE	0.00133898	0.00134509	ACTIVE
R384	0.00179329	0.00180219	ACTIVE	0.00133898	0.00134509	ACTIVE
R385	0.00358657	0.00358701	ACTIVE	0.00267795	0.00267839	ACTIVE
R386	0.00358657	0.00358701	ACTIVE	0.00267795	0.00267839	ACTIVE
R387	0.00179329	0.0017935	ACTIVE	0.00133898	0.00133919	ACTIVE
R388	0.00179329	0.0017935	ACTIVE	0.00133898	0.00133919	ACTIVE
R388b	0	0	INACT	0	0	INACT
R388c	0	0	INACT	0	0	INACT
R388d	0	0	INACT	0	0	INACT
R389	0.000658505	0.000658584	ACTIVE	0.00049168	0.000491759	ACTIVE
R39	-9.01046	10	UND	-10	9.99883	UND
R390	0.00149924	0.00149942	ACTIVE	0.00111942	0.0011196	ACTIVE
R391	0.00149924	0.00149942	ACTIVE	0.00111942	0.0011196	ACTIVE
R392	0.00149924	0.00149942	ACTIVE	0.00111942	0.0011196	ACTIVE
R393	0.00149924	0.00149942	ACTIVE	0.00111942	0.0011196	ACTIVE
R394	0.00149924	0.00149942	ACTIVE	0.00111942	0.0011196	ACTIVE
R395	0.00149924	0.00149942	ACTIVE	0.00111942	0.0011196	ACTIVE
R396	0.00149924	0.00149942	ACTIVE	0.00111942	0.0011196	ACTIVE
R397	0.00149924	0.00149942	ACTIVE	0.00111942	0.0011196	ACTIVE
R398	4.96985e-05	4.97045e-05	ACTIVE	3.71079e-05	3.71139e-05	ACTIVE
R399	0	0	INACT	0	0	INACT
R4	0	0.0063609	UND	0	0.006431	UND
R40	-9.01046	10	UND	-10	9.99883	UND
R400	0	0	INACT	0	0	INACT
R401	0	0	INACT	0	0	INACT
R402	0	0	INACT	0	0	INACT
R403	0	0	INACT	0	0	INACT
R404	0	0	INACT	0	0	INACT
R405	0	0	INACT	0	0	INACT
R406	0	0	INACT	0	0	INACT
R407	0	0	INACT	0	0	INACT
R408	0	0.0063609	UND	0	0.006431	UND
R409	0	0.0063609	UND	0	0.006431	UND
R41	0.391576	0.423381	ACTIVE	0	0.006431	UND
R410	0	0.0063609	UND	0	0.006431	UND
R411	0	0	INACT	0	0	INACT
R412	0.000604864	0.000604937	ACTIVE	0.000451628	0.000451701	ACTIVE
R413	0.000604665	0.000604738	ACTIVE	0.000451479	0.000451552	ACTIVE
R414	0.000604665	0.000604738	ACTIVE	0.000451479	0.000451552	ACTIVE
R415	0.000604665	0.000604738	ACTIVE	0.000451479	0.000451552	ACTIVE
R416	0.000604665	0.000604738	ACTIVE	0.000451479	0.000451552	ACTIVE
R417	0.000604665	0.000604738	ACTIVE	0.000451479	0.000451552	ACTIVE
R418	0.000604665	0.000604738	ACTIVE	0.000451479	0.000451552	ACTIVE
R419	0	0	INACT	0	0	INACT
R420	0	0	INACT	0	0	INACT
R421	0	0	INACT	0	0	INACT
R422	0	0	INACT	0	0	INACT
R423	0	0	INACT	0	0	INACT
R424	0	0	INACT	0	0	INACT
R425	0.00196822	0.00424908	ACTIVE	0.00146959	0.00377559	ACTIVE
R426	0.00196822	0.00424908	ACTIVE	0.00146959	0.00377559	ACTIVE
R427	0.00196822	0.00424908	ACTIVE	0.00146959	0.00377559	ACTIVE
R427b	4.96985e-05	4.97045e-05	ACTIVE	3.71079e-05	3.71139e-05	ACTIVE
R427c	4.96985e-05	4.97045e-05	ACTIVE	3.71079e-05	3.71139e-05	ACTIVE
R428	0.000662646	0.000662726	ACTIVE	0.000494772	0.000494852	ACTIVE
R429	0.000662646	0.000662726	ACTIVE	0.000494772	0.000494852	ACTIVE
R43	0	0.0063609	UND	0.435212	0.441644	ACTIVE
R430	0.000662646	0.000662726	ACTIVE	0.000494772	0.000494852	ACTIVE
R431	0.000331323	0.000331363	ACTIVE	0.000247386	0.000247426	ACTIVE
R432	8.28308e-05	8.28408e-05	ACTIVE	6.18465e-05	6.18565e-05	ACTIVE
R433	8.28308e-05	8.28408e-05	ACTIVE	6.18465e-05	6.18565e-05	ACTIVE
R434	8.28308e-05	8.28408e-05	ACTIVE	6.18465e-05	6.18565e-05	ACTIVE
R435	0	8.28408e-05	UND	0	6.18565e-05	UND
R436	0	8.28328e-05	UND	0	6.18505e-05	UND
R437	8.28308e-05	8.28408e-05	ACTIVE	6.18465e-05	6.18565e-05	ACTIVE
R438	8.28308e-05	8.28408e-05	ACTIVE	6.18465e-05	6.18565e-05	ACTIVE
R439	8.28308e-05	8.28408e-05	ACTIVE	6.18465e-05	6.18565e-05	ACTIVE
R44	0.391576	0.417021	ACTIVE	-0.440358	-0.435212	ACTIVE
R440	0	0	INACT	0	0	INACT
R441	0	0	INACT	0	0	INACT
R442	0	0	INACT	0	0	INACT
R443	0	0	INACT	0	0	INACT
R444	0	0	INACT	0	0	INACT
R445	0	0	INACT	0	0	INACT
R446	0	0	INACT	0	0	INACT
R447	0	0	INACT	0	0	INACT
R448	0	0	INACT	0	0	INACT
R449	0	0	INACT	0	0	INACT
R45	0.384429	0.409874	ACTIVE	0.554306	0.559452	ACTIVE
R450	0	0	INACT	0	0	INACT
R451	0	0	INACT	0	0	INACT
R452	0	0	INACT	0	0	INACT
R453	0	0	INACT	0	0	INACT
R454	0	0	INACT	0	0	INACT
R455	0	0	INACT	0	0	INACT
R456	0	0	INACT	0	0	INACT
R457	0	0	INACT	0	0	INACT
R457b	0	0	INACT	0	0	INACT
R457c	0	0	INACT	0	0	INACT
R458	0	0	INACT	0	0	INACT
R459	0	0.00254436	UND	0	0.00246643	UND
R46	0.508601	0.534049	ACTIVE	-0.0994149	-0.0942657	ACTIVE
R460	0	0	INACT	0	0	INACT
R461	0	0	INACT	0	0	INACT
R462	0	0	INACT	0	0	INACT
R463	0	0	INACT	0	0	INACT
R464	0	0	INACT	0	0	INACT
R465	0	0	INACT	0	0	INACT
R466	0.00237484	0.00245635	ACTIVE	0.00166087	0.00173982	ACTIVE
R467	0.00237484	0.00245635	ACTIVE	0.00166087	0.00173982	ACTIVE
R468	0.00237484	0.00469689	ACTIVE	0.00166087	0.0040056	ACTIVE
R469	0.00237484	0.00469689	ACTIVE	0.00166087	0.0040056	ACTIVE
R470	0.00237484	0.00245635	ACTIVE	0.00166087	0.00173982	ACTIVE
R471	0.00237484	0.00469689	ACTIVE	0.00166087	0.0040056	ACTIVE
R472	0.00237484	0.00469689	ACTIVE	0.00166087	0.0040056	ACTIVE
R473	0.00237484	0.00469689	ACTIVE	0.00166087	0.0040056	ACTIVE
R474	0	0.00231306	UND	0	0.00233855	UND
R475	0	0	INACT	0	0	INACT
R476	0	0	INACT	0	0	INACT
R477	0	0	INACT	0	0	INACT
R478	0	0	INACT	0	0	INACT
R479	0	0	INACT	0	0	INACT
R48	0.508601	0.534049	ACTIVE	-0.0994149	-0.0942657	ACTIVE
R480	0	0	INACT	0	0	INACT
R481	0	0	INACT	0	0	INACT
R482	0	0	INACT	0	0	INACT
R483	0	0	INACT	0	0	INACT
R484	0	0	INACT	0	0	INACT
R484b	0	0	INACT	0	0	INACT
R485	0	0	INACT	0	0	INACT
R486	4.96985e-05	4.97045e-05	ACTIVE	3.71079e-05	3.71139e-05	ACTIVE
R487	0	0	INACT	0	0	INACT
R488	0	0	INACT	0	0	INACT
R489	0	0	INACT	0	0	INACT
R49	1.5086	1.53405	ACTIVE	0.899299	0.905734	ACTIVE
R490	0	0	INACT	0	0	INACT
R491	0	0	INACT	0	0	INACT
R492	0	0	INACT	0	0	INACT
R493	0	0	INACT	0	0	INACT
R494	0	0	INACT	0	0	INACT
R495	1.5147	1.53697	ACTIVE	1.13082	1.15333	ACTIVE
R496	0.212021	0.215202	ACTIVE	0.158286	0.161502	ACTIVE
R497	0	0.00318045	UND	0	0.0032155	UND
R497b	4.96985e-05	4.97045e-05	ACTIVE	3.71079e-05	3.71139e-05	ACTIVE
R498	0	0.00106015	UND	0	0.00107183	UND
R499	0	0.0009087	UND	0	0.000918715	UND
R5	0.999573	1	ACTIVE	0.999569	1	ACTIVE
R50	1.5086	1.53405	ACTIVE	0.899299	0.905734	ACTIVE
R500	0.20561	0.215152	ACTIVE	0.151818	0.161465	ACTIVE
R501	0	0.000795113	UND	0	0.000803876	UND
R502	0	0.0063609	UND	0	0.006431	UND
R503	0	0.000706767	UND	0	0.000714556	UND
R504	0	0.00063609	UND	0	0.0006431	UND
R505	0	0.000578264	UND	0	0.000584637	UND
R506	0	0.000530075	UND	0	0.000535917	UND
R507	0	0.0004893	UND	0	0.000494693	UND
R508	0.00196822	0.00196846	ACTIVE	0.00146959	0.00146983	ACTIVE
R509	0	0.00318045	UND	0	0.0032155	UND
R51	0	0.0254436	UND	0	0.025724	UND
R510	0	0.00106015	UND	0	0.00107183	UND
R511	-0.00622327	-0.00531381	ACTIVE	-0.00464686	-0.00372739	ACTIVE
R512	0.20561	0.215152	ACTIVE	0.151818	0.161465	ACTIVE
R513	0	0.000795113	UND	0	0.000803876	UND
R514	0	0.0063609	UND	0	0.006431	UND
R515	0	0.000706767	UND	0	0.000714556	UND
R516	0	0.00063609	UND	0	0.0006431	UND
R517	0	0.000578264	UND	0	0.000584637	UND
R518	0	0.000530075	UND	0	0.000535917	UND
R519	0	0.0004893	UND	0	0.000494693	UND
R52	1.76285	1.86076	ACTIVE	1.21731	1.29518	ACTIVE
R520	0	0.0063609	UND	0	0.006431	UND
R521	-0.0063609	0.0063609	UND	-0.006431	0.006431	UND
R522	-0.0063609	0.00106015	UND	-0.006431	0.00107183	UND
R53	1.76285	1.86076	ACTIVE	1.21731	1.29518	ACTIVE
R533	0	0.00106015	UND	0	0.00107183	UND
R534	0	0.00106015	UND	0	0.00107183	UND
R535	0	0.0063609	UND	0	0.006431	UND
R536	0	0.0063609	UND	0	0.006431	UND
R537	0	0	INACT	0	0	INACT
R538	0	0	INACT	0	0	INACT
R539	0	0	INACT	0	0	INACT
R54	2.52674	2.53948	ACTIVE	1.66419	1.67063	ACTIVE
R540	0	0	INACT	0	0	INACT
R541	0.470291	0.470436	ACTIVE	0.3511	0.351247	ACTIVE
R542	0	0	INACT	0	0	INACT
R543	0.235145	0.235218	ACTIVE	0.17555	0.175623	ACTIVE
R544	0.235145	0.235218	ACTIVE	0.17555	0.175623	ACTIVE
R545	0.235145	0.235218	ACTIVE	0.17555	0.175623	ACTIVE
R546	0	0	INACT	0	0	INACT
R547	0.235145	0.235218	ACTIVE	0.17555	0.175623	ACTIVE
R548	0.235145	0.235218	ACTIVE	0.17555	0.175623	ACTIVE
R549	0.235145	0.235218	ACTIVE	0.17555	0.175623	ACTIVE
R55	0.738013	0.823934	ACTIVE	0.419544	0.495563	ACTIVE
R550	0	0	INACT	0	0	INACT
R551	0.235145	0.235218	ACTIVE	0.17555	0.175623	ACTIVE
R552	0	0.0004893	UND	0	0.000494693	UND
R553	0.00961897	0.0101491	ACTIVE	0.00718087	0.0077168	ACTIVE
R554	0.0212062	0.0217845	ACTIVE	0.0158313	0.016416	ACTIVE
R555	0.0212062	0.0218423	ACTIVE	0.0158313	0.0164745	ACTIVE
R556	0.0308251	0.0315319	ACTIVE	0.0230122	0.0237268	ACTIVE
R557	0.0424123	0.0432075	ACTIVE	0.0316627	0.0324666	ACTIVE
R558	0.0593642	0.060273	ACTIVE	0.0443175	0.0452363	ACTIVE
R559	0.0593642	0.0604244	ACTIVE	0.0443175	0.0453894	ACTIVE
R56	0.738013	0.823934	ACTIVE	0.419544	0.495563	ACTIVE
R560	0.0593642	0.0625447	ACTIVE	0.0443175	0.0475331	ACTIVE
R561	0.0593642	0.0625447	ACTIVE	0.0443175	0.0475331	ACTIVE
R562	0.0593642	0.0625447	ACTIVE	0.0443175	0.0475331	ACTIVE
R563	0.0593642	0.0625447	ACTIVE	0.0443175	0.0475331	ACTIVE
R564	0.0593642	0.0625447	ACTIVE	0.0443175	0.0475331	ACTIVE
R565	0.0115872	0.0179481	ACTIVE	0.00865046	0.0150815	ACTIVE
R566	0	0.00318045	UND	0	0.0032155	UND
R567	0	0.00318045	UND	0	0.0032155	UND
R568	0	0.00318045	UND	0	0.0032155	UND
R569	0	0.00318045	UND	0	0.0032155	UND
R57	0.738013	0.823934	ACTIVE	0.419544	0.495563	ACTIVE
R570	0	0.00318045	UND	0	0.0032155	UND
R571	0.00153734	0.00177828	ACTIVE	0.00114787	0.00139147	ACTIVE
R571b	-2.02774	-2.02712	ACTIVE	-1.51399	-1.51336	ACTIVE
R572	2.35145	2.35218	ACTIVE	1.7555	1.75623	ACTIVE
R573	0	0.000240943	UND	0	0.000243599	UND
R574	0	0.000240943	UND	0	0.000243599	UND
R575	0.0115872	0.0179481	ACTIVE	0.00865046	0.0150815	ACTIVE
R576	0.0115872	0.0179481	ACTIVE	0.00865046	0.0150815	ACTIVE
R577	0.0231744	0.0242346	ACTIVE	0.0173009	0.0183728	ACTIVE
R578	0.0231744	0.0242346	ACTIVE	0.0173009	0.0183728	ACTIVE
R579	0.0231744	0.0242346	ACTIVE	0.0173009	0.0183728	ACTIVE
R58	0.738013	0.823934	ACTIVE	0.419544	0.495563	ACTIVE
R580	0.0231744	0.0242346	ACTIVE	0.0173009	0.0183728	ACTIVE
R581	0.0231744	0.0242346	ACTIVE	0.0173009	0.0183728	ACTIVE
R582	0.0231744	0.0242346	ACTIVE	0.0173009	0.0183728	ACTIVE
R583	0.00214863	0.00238957	ACTIVE	0.0016043	0.0018479	ACTIVE
R587	0.00214863	0.00238957	ACTIVE	0.0016043	0.0018479	ACTIVE
R588	0.000611291	0.000611365	ACTIVE	0.000456427	0.000456501	ACTIVE
R589	0.000611291	0.000611365	ACTIVE	0.000456427	0.000456501	ACTIVE
R59	0.677971	0.763892	ACTIVE	0.374713	0.450733	ACTIVE
R590	0	0	INACT	0	0	INACT
R591	0.00370426	0.0100652	ACTIVE	-0.997234	-0.990803	ACTIVE
R592	0	0	INACT	0	0	INACT
R593	0	0	INACT	0	0	INACT
R594	0.00155563	0.00155582	ACTIVE	0.00116153	0.00116171	ACTIVE
R595	0.00155563	0.00155582	ACTIVE	0.00116153	0.00116171	ACTIVE
R596	0.00155563	0.00155582	ACTIVE	0.00116153	0.00116171	ACTIVE
R597	0.00155563	0.00155582	ACTIVE	0.00116153	0.00116171	ACTIVE
R598	0.00155563	0.00155582	ACTIVE	0.00116153	0.00116171	ACTIVE
R599	0.000271685	0.000271718	ACTIVE	0.000202856	0.000202889	ACTIVE
R6	0.999573	1	ACTIVE	0.999569	1	ACTIVE
R60	0.677971	0.763892	ACTIVE	0.374713	0.450733	ACTIVE
R600	0	0	INACT	0	0	INACT
R601	0	0	INACT	0	0	INACT
R602	0.00128394	0.0012841	ACTIVE	0.00095867	0.000958825	ACTIVE
R603	0.000468889	0.000468945	ACTIVE	0.000350101	0.000350157	ACTIVE
R604	0.000197204	0.000197227	ACTIVE	0.000147244	0.000147268	ACTIVE
R605	0	0	INACT	0	0	INACT
R606	0.000815055	0.000815154	ACTIVE	0.000608569	0.000608668	ACTIVE
R607	0.000815055	0.000815154	ACTIVE	0.000608569	0.000608668	ACTIVE
R608	0.000815055	0.000815154	ACTIVE	0.000608569	0.000608668	ACTIVE
R609	0	0	INACT	0	0	INACT
R61	0	0.0063609	UND	0	0.006431	UND
R610	0.000815055	0.000815154	ACTIVE	0.000608569	0.000608668	ACTIVE
R611	0.000815055	0.000815154	ACTIVE	0.000608569	0.000608668	ACTIVE
R612	0.00054337	0.000543436	ACTIVE	0.000405713	0.000405779	ACTIVE
R613	0.00054337	0.000543436	ACTIVE	0.000405713	0.000405779	ACTIVE
R614	0.000271685	0.000271718	ACTIVE	0.000202856	0.000202889	ACTIVE
R615	0	0	INACT	0	0	INACT
R616	0	0	INACT	0	0	INACT
R617	0	0	INACT	0	0	INACT
R618	1.5147	1.53697	ACTIVE	1.13082	1.15333	ACTIVE
R619	0	0	INACT	0	0	INACT
R62	0	0.00508872	UND	0	0.0051448	UND
R620	0.00196822	0.00196846	ACTIVE	0.00146959	0.00146983	ACTIVE
R621	0.00196822	0.00196846	ACTIVE	0.00146959	0.00146983	ACTIVE
R622	0.00196822	0.00196846	ACTIVE	0.00146959	0.00146983	ACTIVE
R623	0.00196822	0.00196846	ACTIVE	0.00146959	0.00146983	ACTIVE
R624	0.00157458	0.00157477	ACTIVE	0.00117567	0.00117586	ACTIVE
R625	0.00157458	0.00157477	ACTIVE	0.00117567	0.00117586	ACTIVE
R626	0.00157458	0.00157477	ACTIVE	0.00117567	0.00117586	ACTIVE
R627	0.00157458	0.00157477	ACTIVE	0.00117567	0.00117586	ACTIVE
R628	0.000393644	0.000393691	ACTIVE	0.000293918	0.000293966	ACTIVE
R629	0.000393644	0.000393691	ACTIVE	0.000293918	0.000293966	ACTIVE
R63	0.674349	0.763892	ACTIVE	0.372008	0.456735	ACTIVE
R630	0.000393644	0.000393691	ACTIVE	0.000293918	0.000293966	ACTIVE
R631	0.000393644	0.000393691	ACTIVE	0.000293918	0.000293966	ACTIVE
R632	9.84109e-05	9.84228e-05	ACTIVE	7.34796e-05	7.34914e-05	ACTIVE
R633	9.84109e-05	9.84228e-05	ACTIVE	7.34796e-05	7.34914e-05	ACTIVE
R634	0.000196822	0.000196846	ACTIVE	0.000146959	0.000146983	ACTIVE
R635	9.84109e-05	9.84228e-05	ACTIVE	7.34796e-05	7.34914e-05	ACTIVE
R636	9.84109e-05	9.84228e-05	ACTIVE	7.34796e-05	7.34914e-05	ACTIVE
R637	0.00196822	0.00196846	ACTIVE	0.00146959	0.00146983	ACTIVE
R638	0.00196822	0.00196846	ACTIVE	0.00146959	0.00146983	ACTIVE
R639	0.00196822	0.00196846	ACTIVE	0.00146959	0.00146983	ACTIVE
R64	0.711929	0.797848	ACTIVE	0.400066	0.477186	ACTIVE
R640	0.00196822	0.00196846	ACTIVE	0.00146959	0.00146983	ACTIVE
R641	0.00196822	0.00196846	ACTIVE	0.00146959	0.00146983	ACTIVE
R642	0.00196822	0.00196846	ACTIVE	0.00146959	0.00146983	ACTIVE
R643	0.000675071	0.000675153	ACTIVE	0.000504049	0.00050413	ACTIVE
R644	0	0	INACT	0	0	INACT
R645	0	0	INACT	0	0	INACT
R646	0	0	INACT	0	0	INACT
R647	0	0	INACT	0	0	INACT
R648	0	0	INACT	0	0	INACT
R649	0.00155563	0.00155582	ACTIVE	0.00116153	0.00116171	ACTIVE
R65	0.81903	9.41385	ACTIVE	0.719639	9.68654	ACTIVE
R650	0	0	INACT	0	0	INACT
R651	0	0	INACT	0	0	INACT
R652	0	0	INACT	0	0	INACT
R653	0	0	INACT	0	0	INACT
R654	0	0	INACT	0	0	INACT
R655	0	0	INACT	0	0	INACT
R656	0	0	INACT	0	0	INACT
R657	0	0	INACT	0	0	INACT
R658	0	0	INACT	0	0	INACT
R659	0	0	INACT	0	0	INACT
R660	0	0	INACT	0	0	INACT
R661	0	0	INACT	0	0	INACT
R662	0	0	INACT	0	0	INACT
R663	0	0	INACT	0	0	INACT
R664	0	0	INACT	0	0	INACT
R665	0	0	INACT	0	0	INACT
R666	0	0	INACT	0	0	INACT
R667	0	0	INACT	0	0	INACT
R668	0	0	INACT	0	0	INACT
R669	0	0	INACT	0	0	INACT
R67	0	0.00759775	UND	0	0.00548513	UND
R670	0	0	INACT	0	0	INACT
R671	0	0	INACT	0	0	INACT
R672	0	0	INACT	0	0	INACT
R673	0	0	INACT	0	0	INACT
R674	0	0	INACT	0	0	INACT
R678	0.00806531	0.00814683	ACTIVE	0.00590972	0.00598867	ACTIVE
R679	0.00569048	0.00569116	ACTIVE	0.00424885	0.00424954	ACTIVE
R68	0	0.0381654	UND	0	0.00771721	UND
R680	0.00569048	0.00569116	ACTIVE	0.00424885	0.00424954	ACTIVE
R681	0.00569048	0.00569116	ACTIVE	0.00424885	0.00424954	ACTIVE
R682	0.00569048	0.00569116	ACTIVE	0.00424885	0.00424954	ACTIVE
R683	0.00569048	0.00569116	ACTIVE	0.00424885	0.00424954	ACTIVE
R684	0.00569048	0.00569116	ACTIVE	0.00424885	0.00424954	ACTIVE
R685	0.000687496	0.000687579	ACTIVE	0.000513326	0.000513409	ACTIVE
R686	0.000687496	0.000687579	ACTIVE	0.000513326	0.000513409	ACTIVE
R687	0.000687496	0.000687579	ACTIVE	0.000513326	0.000513409	ACTIVE
R688	0.000604665	0.000604738	ACTIVE	0.000451479	0.000451552	ACTIVE
R689	0.000604665	0.000604738	ACTIVE	0.000451479	0.000451552	ACTIVE
R69	0	0.0084812	UND	0	0.00857467	UND
R690	0.000604665	0.000604738	ACTIVE	0.000451479	0.000451552	ACTIVE
R691	0.000604665	0.000604738	ACTIVE	0.000451479	0.000451552	ACTIVE
R692	0.000604665	0.000604738	ACTIVE	0.000451479	0.000451552	ACTIVE
R693	0.000604665	0.000604738	ACTIVE	0.000451479	0.000451552	ACTIVE
R694	0	0	INACT	0	0	INACT
R695	0.0791153	0.0791249	ACTIVE	0.0590723	0.0590819	ACTIVE
R696	0.0791153	0.0791249	ACTIVE	0.0590723	0.0590819	ACTIVE
R697	0.0791153	0.0791249	ACTIVE	0.0590723	0.0590819	ACTIVE
R698	0.00826983	0.00827083	ACTIVE	0.00617475	0.00617575	ACTIVE
R699	0.00413491	0.00413541	ACTIVE	0.00308738	0.00308788	ACTIVE
R7	0	0.0063609	UND	0	0.006431	UND
R70	0	0	INACT	0	0	INACT
R700	0.00013783	0.000137847	ACTIVE	0.000102913	0.000102929	ACTIVE
R701	0.00013783	0.000137847	ACTIVE	0.000102913	0.000102929	ACTIVE
R702	0.00013783	0.000137847	ACTIVE	0.000102913	0.000102929	ACTIVE
R705	0.00013783	0.000137847	ACTIVE	0.000102913	0.000102929	ACTIVE
R706	0.00013783	0.000137847	ACTIVE	0.000102913	0.000102929	ACTIVE
R707	0.00013783	0.000137847	ACTIVE	0.000102913	0.000102929	ACTIVE
R708	0.00013783	0.000137847	ACTIVE	0.000102913	0.000102929	ACTIVE
R709	0.00013783	0.000137847	ACTIVE	0.000102913	0.000102929	ACTIVE
R71	0	0	INACT	0	0	INACT
R710	0.00013783	0.000137847	ACTIVE	0.000102913	0.000102929	ACTIVE
R711	0.00413491	0.00413541	ACTIVE	0.00308738	0.00308788	ACTIVE
R712	-9.99159	9.77849	UND	-9.99372	9.83651	UND
R713	0.00413491	0.00413541	ACTIVE	0.00308738	0.00308788	ACTIVE
R714	-10	9.77008	UND	-10	9.83023	UND
R715	-0.00840867	-0.00840766	ACTIVE	-0.00627868	-0.00627767	ACTIVE
R716	0.00840766	0.00840867	ACTIVE	0.00627767	0.00627868	ACTIVE
R717	0.00840766	0.00840867	ACTIVE	0.00627767	0.00627868	ACTIVE
R718	0.00413491	0.00413541	ACTIVE	0.00308738	0.00308788	ACTIVE
R719	0.00413491	0.00413541	ACTIVE	0.00308738	0.00308788	ACTIVE
R72	-8.616	0.0385223	UND	-9.21303	-0.173456	ACTIVE
R722	0.00289444	0.00289479	ACTIVE	0.00216116	0.00216151	ACTIVE
R723	0.00413491	0.00413541	ACTIVE	0.00308738	0.00308788	ACTIVE
R724	0.00413491	0.00413541	ACTIVE	0.00308738	0.00308788	ACTIVE
R725	0.00413491	0.00413541	ACTIVE	0.00308738	0.00308788	ACTIVE
R726	0.00413491	0.00413541	ACTIVE	0.00308738	0.00308788	ACTIVE
R727	0.00413491	0.00413541	ACTIVE	0.00308738	0.00308788	ACTIVE
R728	0.00413491	0.00413541	ACTIVE	0.00308738	0.00308788	ACTIVE
R729	0.00413491	0.00413541	ACTIVE	0.00308738	0.00308788	ACTIVE
R73	-7.89034	10	UND	-8.3114	10	UND
R730	0.00413491	0.00413541	ACTIVE	0.00308738	0.00308788	ACTIVE
R731	0.00013783	0.000137847	ACTIVE	0.000102913	0.000102929	ACTIVE
R74	-10	7.89034	UND	-10	8.3114	UND
R75	0	0.0417876	UND	0	0.0104218	UND
R76	-0.0036348	0.0417876	UND	-0.00367486	0.0104218	UND
R77	0	0.0063609	UND	0	0.006431	UND
R78	0	0.00115653	UND	0	0.00116927	UND
R79	0	0	INACT	0	0	INACT
R8	0	0	INACT	0	0	INACT
R80	0	8.48602	UND	0	8.87032	UND
R800	-0.693584	-0.691723	ACTIVE	-0.771552	-0.76967	ACTIVE
R801	0	0	INACT	0	0	INACT
R803	0	0	INACT	0	0	INACT
R804	2.62804	2.65094	ACTIVE	2.12308	2.13064	ACTIVE
R805	-3.83871	-3.82413	ACTIVE	-2.65792	-2.64319	ACTIVE
R806	0	0	INACT	0	0	INACT
R807	0	0	INACT	0	0	INACT
R808	0	0	INACT	0	0	INACT
R809	0	0	INACT	0	0	INACT
R81	0	0	INACT	0	0	INACT
R810	0	0	INACT	0	0	INACT
R811	0	0	INACT	0	0	INACT
R812	0	0	INACT	0.999655	1	ACTIVE
R813	0	0	INACT	0	0	INACT
R814	0	0	INACT	0	0	INACT
R815	0	0	INACT	0	0	INACT
R816	0	0	INACT	0	0	INACT
R817	0.999573	1	ACTIVE	0.999569	1	ACTIVE
R818	0	0	INACT	0	0	INACT
R819	0	0	INACT	0	0	INACT
R82	0.0216188	0.0232445	ACTIVE	0.0161394	0.0177833	ACTIVE
R820	0	0	INACT	0	0	INACT
R821	0	0	INACT	0	0	INACT
R822	0	0	INACT	0	0	INACT
R823	0	0	INACT	0	0	INACT
R824	0	0	INACT	0	0	INACT
R825	0	0	INACT	0	0	INACT
R826	0	0	INACT	0	0	INACT
R827	0.00736111	0.0160199	ACTIVE	0.00544931	0.0142035	ACTIVE
R828	0	0	INACT	0	0	INACT
R829	0	0	INACT	0	0	INACT
R83	0.0216188	0.0232445	ACTIVE	0.0161394	0.0177833	ACTIVE
R830	0	0	INACT	0	0	INACT
R831	0	0.0084812	UND	0	0.00857467	UND
R832	0	0.0084812	UND	0	0.00857467	UND
R833	0	0.0084812	UND	0	0.00857467	UND
R834	0	0.0084812	UND	0	0.00857467	UND
R835	0.00638112	0.00638568	ACTIVE	0.00476453	0.00476914	ACTIVE
R836	0	0	INACT	0	0	INACT
R837	0	0	INACT	0	0	INACT
R838	0	0	INACT	0	0	INACT
R839	0	0	INACT	0	0	INACT
R84	0.0216188	0.0232445	ACTIVE	0.0161394	0.0177833	ACTIVE
R840	0	0	INACT	0	0	INACT
R841	0	0	INACT	0	0	INACT
R842	0	0.0084812	UND	0	0.00857467	UND
R843	0	0.0084812	UND	0	0.00857467	UND
R844	0	0	INACT	0	0	INACT
R845	0.737666	0.738221	ACTIVE	0.550688	0.551222	ACTIVE
R846	0	0	INACT	0	0	INACT
R847	0	0	INACT	0	0	INACT
R848	0	0	INACT	0	0	INACT
R849	0	0	INACT	0	0	INACT
R85	0.0216188	0.0232445	ACTIVE	0.0161394	0.0177833	ACTIVE
R850	0	0	INACT	0	0	INACT
R851	0	0	INACT	0	0	INACT
R852	0	0	INACT	0	0	INACT
R853	0	0	INACT	0	0	INACT
R854	0	0	INACT	0	0	INACT
R855	0	0	INACT	0	0	INACT
R856	0	0	INACT	0	0	INACT
R857	0	0	INACT	0	0	INACT
R858	0	0	INACT	0	0	INACT
R859	0	0	INACT	0	0	INACT
R86	0	0	INACT	0	0	INACT
R860	0	0	INACT	0	0	INACT
R861	0	0	INACT	0	0	INACT
R862	0	0	INACT	0	0	INACT
R863	0.999799	1	ACTIVE	0	0	INACT
R864	0	0	INACT	0	0	INACT
R865	0	0	INACT	0	0	INACT
R866	0.999117	1	ACTIVE	0.999108	1	ACTIVE
R867	0	0	INACT	0	0	INACT
R868	0	1	UND	0	1	UND
R869	0	1	UND	0	1	UND
R87	0	0.0088983	UND	0	0.00611406	UND
R870	0	1	UND	0	1	UND
R871	0	1	UND	0	1	UND
R872	0	0	INACT	0	0	INACT
R873	0	0	INACT	0	0	INACT
R874	0	1	UND	0	1	UND
R875	0	1	UND	0	1	UND
R876	0	0	INACT	0	0	INACT
R877	0	1	UND	0	1	UND
R878	0	1	UND	0	1	UND
R879	0	0	INACT	0	0	INACT
R88	0	0.0088983	UND	0	0.00611406	UND
R880	0	0	INACT	0	0	INACT
R881	0	0	INACT	0	0	INACT
R882	0	0	INACT	0	0	INACT
R883	0	1	UND	0	1	UND
R884	0	1	UND	0	1	UND
R885	0	0	INACT	0	0	INACT
R886	0	1	UND	0	1	UND
R887	0	1	UND	0	1	UND
R888	0	0.0254436	UND	0	0.025724	UND
R889	0	0.0127218	UND	0	0.012862	UND
R89	0	0.0088983	UND	0	0.00611406	UND
R890	0	0.0254436	UND	0	0.025724	UND
R891	0	1	UND	0	1	UND
R892	0	1	UND	0	1	UND
R893	0	0	INACT	0	0	INACT
R894	0	0	INACT	0	0	INACT
R895	0	0	INACT	0	0	INACT
R896	0	0	INACT	0	0	INACT
R897	0	1	UND	0	1	UND
R898	0	1	UND	0	1	UND
R899	0	0	INACT	0	0	INACT
R9	0	0	INACT	0	0	INACT
R90	-0.588803	-0.55746	ACTIVE	-0.425708	-0.416509	ACTIVE
R900	0	0	INACT	0	0	INACT
R901	0	0	INACT	0	0	INACT
R902	0	0	INACT	0	0	INACT
R903	0	0.0063609	UND	0	0.006431	UND
R904	0	0	INACT	0	0	INACT
R905	0	0	INACT	0	0	INACT
R906	0	0	INACT	0	0	INACT
R907	0	0	INACT	0	0	INACT
R908	0	0	INACT	0	0	INACT
R909	0	0	INACT	0	0	INACT
R91	0.559772	0.585216	ACTIVE	0.417884	0.42303	ACTIVE
R910	0	0	INACT	0	0	INACT
R911	0	0	INACT	0	0	INACT
R912	0	0	INACT	0	0	INACT
R913	0	0	INACT	0	0	INACT
R914	0	0	INACT	0	0	INACT
R915	0	0	INACT	0	0	INACT
R916	0	0	INACT	0	0	INACT
R917	0	0	INACT	0	0	INACT
R918	0	0	INACT	0	0	INACT
R919	0	0	INACT	0	0	INACT
R92	-0.772934	-0.726288	ACTIVE	-0.55634	-0.540048	ACTIVE
R920	0	0	INACT	0	0	INACT
R921	0	0	INACT	0	0	INACT
R922	0	0	INACT	0	0	INACT
R923	9.9397e-05	9.9409e-05	ACTIVE	7.42158e-05	7.42278e-05	ACTIVE
R924	0	0	INACT	0	0	INACT
R925	0	0	INACT	0	0	INACT
R926	0	0	INACT	0	0	INACT
R927	0	0	INACT	0	0	INACT
R928	0	0	INACT	0	0	INACT
R929	0	0	INACT	0	0	INACT
R93	0	0.0364059	UND	0	0.0365294	UND
R930	0	0	INACT	0	0	INACT
R931	0	0	INACT	0	0	INACT
R932	0	0	INACT	0	0	INACT
R933	0	0	INACT	0	0	INACT
R934	0	0	INACT	0	0	INACT
R935	0	0	INACT	0	0	INACT
R936	0	0	INACT	0	0	INACT
R937	0	0	INACT	0	0	INACT
R938	0	0	INACT	0	0	INACT
R939	0	0	INACT	0	0	INACT
R94	0.273291	0.312676	ACTIVE	0.204194	0.242778	ACTIVE
R940	0	0	INACT	0	0	INACT
R941	0	0	INACT	0	0	INACT
R95	0	0.0364059	UND	0	0.0365294	UND
R96	0.284168	0.323544	ACTIVE	0.212315	0.250892	ACTIVE
R97	-0.288967	-0.273291	ACTIVE	-0.208796	-0.204194	ACTIVE
R98	0	0.0381654	UND	0	0.00771721	UND
R99	0	0.0381654	UND	0	0.00771721	UND
R_BIOMASSe	0.0828308	0.0828408	ACTIVE	0.0618465	0.0618565	ACTIVE
R_BXT	0.0828308	0.0828408	ACTIVE	0.0618465	0.0618565	ACTIVE
R_CL	0	0	INACT	0	0	INACT
R_DAT	0	0	INACT	0	0	INACT
R_DIM	0	0	INACT	0	0	INACT
R_DNA	0.00182228	0.0018225	ACTIVE	0.00136062	0.00136084	ACTIVE
R_EX_9_HEXADECENOATE	0	0	INACT	0	0	INACT
R_EX_9_OCTADECENOATE	0	0	INACT	0	0	INACT
R_EX_AC	0	0	INACT	0	0	INACT
R_EX_ACAL	0	0	INACT	0	0	INACT
R_EX_AD	-0.738221	-0.737666	ACTIVE	-0.551222	-0.550688	ACTIVE
R_EX_ADN	0	0	INACT	0	0	INACT
R_EX_AKG	0	0	INACT	0	0	INACT
R_EX_ALA	0	0	INACT	0	0	INACT
R_EX_AN	0	0	INACT	0	0	INACT
R_EX_ARG	0	0	INACT	0	0	INACT
R_EX_ASN	0	0	INACT	0	0	INACT
R_EX_ASP	0	0	INACT	0	0	INACT
R_EX_BIOTIN	0	0	INACT	0	0	INACT
R_EX_CADA	0	0.0063609	UND	0	0.006431	UND
R_EX_CELB	0	0	INACT	0	0	INACT
R_EX_CHOLESTEROL	0	0	INACT	0	0	INACT
R_EX_CIT	0	0	INACT	0	0	INACT
R_EX_CITR	0	0	INACT	0	0	INACT
R_EX_CO2	3.82413	3.83871	ACTIVE	2.64319	2.65792	ACTIVE
R_EX_CO_II	0	0	INACT	0	0	INACT
R_EX_CYS	0	0	INACT	0	0	INACT
R_EX_DA	0	0	INACT	0	0	INACT
R_EX_DALA	0	0	INACT	0	0	INACT
R_EX_DAPIM	-0.0160199	-0.00736111	ACTIVE	-0.0142035	-0.00544931	ACTIVE
R_EX_DC	0	0	INACT	0	0	INACT
R_EX_DGLU	0	0	INACT	0	0	INACT
R_EX_DIN	0	0	INACT	0	0	INACT
R_EX_DODECANOATE	0	0	INACT	0	0	INACT
R_EX_DT	0	0	INACT	0	0	INACT
R_EX_DU	0	0	INACT	0	0	INACT
R_EX_EICOSANOATE	0	0	INACT	0	0	INACT
R_EX_ELECTROPHILE_X	0	0	INACT	0	0	INACT
R_EX_ETH	0	0	INACT	0	0	INACT
R_EX_FE3	-9.9409e-05	-9.9397e-05	ACTIVE	-7.42278e-05	-7.42158e-05	ACTIVE
R_EX_FOR	0	0	INACT	0	0	INACT
R_EX_FRU	0	0	INACT	0	0	INACT
R_EX_FUM	0	0	INACT	0	0	INACT
R_EX_GABA	0	0	INACT	0	0	INACT
R_EX_GL	0	0	INACT	-1	-0.999655	ACTIVE
R_EX_GL3P	0	0	INACT	0	0	INACT
R_EX_GLAC	0	0	INACT	0	0	INACT
R_EX_GLC	-1	-0.999799	ACTIVE	0	0	INACT
R_EX_GLN	0	0	INACT	0	0	INACT
R_EX_GLU	0	0	INACT	0	0	INACT
R_EX_GLUC	0	0	INACT	0	0	INACT
R_EX_GLY	-1	-0.999117	ACTIVE	-1	-0.999108	ACTIVE
R_EX_GLYCOLATE	0	0	INACT	0	0	INACT
R_EX_GLYN	0	0	INACT	0	0	INACT
R_EX_GN	0	0	INACT	0	0	INACT
R_EX_GSN	0	0	INACT	0	0	INACT
R_EX_H2X	0	0	INACT	0	0	INACT
R_EX_HEPTADECANOATE	0	0	INACT	0	0	INACT
R_EX_HEXACOSANOATE	0	0	INACT	0	0	INACT
R_EX_HEXADECANOATE	0	0	INACT	0	0	INACT
R_EX_HEXANOATE	0	0	INACT	0	0	INACT
R_EX_HIS	0	0.000211779	UND	0	0.00020947	UND
R_EX_HYXN	0	0	INACT	0	0	INACT
R_EX_ILE	0	0.000162786	UND	0	0.000164585	UND
R_EX_INS	0	0	INACT	0	0	INACT
R_EX_LAC	0	0	INACT	0	0	INACT
R_EX_LEU	0	0.000171164	UND	0	0.000173053	UND
R_EX_LLAC	0	0	INACT	0	0	INACT
R_EX_LYS	0	0.0084812	UND	0	0.00857467	UND
R_EX_MAL	0	0	INACT	0	0	INACT
R_EX_MAN	0	0	INACT	0	0	INACT
R_EX_MET	-0.00638568	-0.00638112	ACTIVE	-0.00476914	-0.00476453	ACTIVE
R_EX_MLT	0	0	INACT	0	0	INACT
R_EX_MO2	0	0	INACT	0	0	INACT
R_EX_NAC	0	0	INACT	0	0	INACT
R_EX_NH3	0.691723	0.693584	ACTIVE	0.76967	0.771552	ACTIVE
R_EX_NO2	0	0	INACT	0	0	INACT
R_EX_NO3	0	0	INACT	0	0	INACT
R_EX_NONADECANOATE	0	0	INACT	0	0	INACT
R_EX_N_ACETYL_S_CONJUGATE	0	0	INACT	0	0	INACT
R_EX_O2	-2.65094	-2.62804	ACTIVE	-2.13064	-2.12308	ACTIVE
R_EX_ORN	0	0	INACT	0	0	INACT
R_EX_PENTADECANOATE	0	0	INACT	0	0	INACT
R_EX_PHE	0	0	INACT	0	0	INACT
R_EX_PHOSPHATIDYLCHOLINE	0	0	INACT	0	0	INACT
R_EX_PI	0	0	INACT	0	0	INACT
R_EX_PRO	0	0.000225863	UND	0	0.000228358	UND
R_EX_PROPANOATE	0	0	INACT	0	0	INACT
R_EX_PYR	0	0	INACT	0	0	INACT
R_EX_RIB	0	0	INACT	0	0	INACT
R_EX_SER	0	0.000522987	UND	0	0.00052878	UND
R_EX_SLF	0	0	INACT	0	0	INACT
R_EX_SUC	0	0	INACT	0	0	INACT
R_EX_SUCC	0	0.000393556	UND	0	0.00039791	UND
R_EX_T3	-1	-0.999573	ACTIVE	-1	-0.999569	ACTIVE
R_EX_TAG	0	0	INACT	0	0	INACT
R_EX_TETRACOSANOATE	0	0	INACT	0	0	INACT
R_EX_TETRADECANOATE	0	0	INACT	0	0	INACT
R_EX_THR	0	0.000293635	UND	0	0.00029688	UND
R_EX_TRE	0	0	INACT	0	0	INACT
R_EX_TRP	0	0	INACT	0	0	INACT
R_EX_TYR	0	0	INACT	0	0	INACT
R_EX_URA	0	0	INACT	0	0	INACT
R_EX_UREA	0	0	INACT	0	0	INACT
R_EX_URI	0	0	INACT	0	0	INACT
R_EX_VAL	0	0.000214442	UND	0	0.00021681	UND
R_EX_XAN	0	0	INACT	0	0	INACT
R_GLUCAN	0	0	INACT	0	0	INACT
R_LAM	0.0154065	0.0154084	ACTIVE	0.0115034	0.0115053	ACTIVE
R_LM	0.000986018	0.000986137	ACTIVE	0.000736221	0.00073634	ACTIVE
R_MAPC	0.0172288	0.0172309	ACTIVE	0.0128641	0.0128661	ACTIVE
R_MPD	0	0	INACT	0	0	INACT
R_PAT	0	0	INACT	0	0	INACT
R_PE	0.000496985	0.000497045	ACTIVE	0.000371079	0.000371139	ACTIVE
R_PGL	0	0	INACT	0	0	INACT
R_PIMS	0.00331323	0.00331363	ACTIVE	0.00247386	0.00247426	ACTIVE
R_PROT	0.0177258	0.0177279	ACTIVE	0.0132351	0.0132373	ACTIVE
R_P_L_GLX	0.00289908	0.00289943	ACTIVE	0.00216463	0.00216498	ACTIVE
R_RNA	0.00298191	0.00298227	ACTIVE	0.00222647	0.00222683	ACTIVE
R_SL_1	0	0	INACT	0	0	INACT
R_SM_MOL	0.00414154	0.00414204	ACTIVE	0.00309232	0.00309282	ACTIVE
R_TAG	2.02844	2.02907	ACTIVE	1.51435	1.51498	ACTIVE
R_TDM	0	0	INACT	0	0	INACT
R_TMM	0.00410046	0.00410095	ACTIVE	0.00306165	0.00306214	ACTIVE

## Sheet: KO_gene
Gene	Glucose medium		Glycerol medium
	GRateKO	Ratio	GRateKO	Ratio
Rv3696c	0.0828408	1	0.0328377	0.530869
Rv2249c	0.0828408	1	0.0618565	1
Rv3302c	0.0828408	1	0.0618565	1
Rv2858c	0.0828408	1	0.0618565	1
Rv0458	0.0828408	1	0.0618565	1
Rv2205c	0.0593966	0.716997	0.0386689	0.625139
Rv2436	0.0828408	1	0.0618565	1
Rv0363c	0.0826765	0.998017	0	0
Rv3255c	0	0	0	0
Rv3308	0.0828408	1	0.0618565	1
Rv3257c	0.0828408	1	0.0618565	1
Rv3264c	0	0	0	0
Rv2051c	0	0	0	0
Rv0112	0.0828408	1	0.0618565	1
Rv1511	0.0828408	1	0.0618565	1
Rv1512	0.0828408	1	0.0618565	1
Rv0620	0.0828408	1	0.0618565	1
Rv0619	0.0828408	1	0.0618565	1
Rv0618	0.0828408	1	0.0618565	1
Rv0501	0.0828408	1	0.0618565	1
Rv0536	0.0828408	1	0.0618565	1
Rv3634c	0.0828408	1	0.0618565	1
Rv0993	0	0	0	0
Rv0046c	0.0828408	1	0.0618565	1
Rv1822	0.0828408	1	0.0618565	1
Rv2612c	0	0	0	0
Rv2701c	0	0	0	0
Rv2471	0.0828408	1	0.0618565	1
Rv0186	0.0828408	1	0.0618565	1
Rv3490	0	0	0	0
Rv3401	0.0828344	0.999923	0.0618517	0.999922
Rv3400	0.0828344	0.999923	0.0618517	0.999922
Rv3372	0.0828408	1	0.0618565	1
Rv2900c	0	0	0	0
Rv0650	0.0828408	1	0.0618565	1
Rv2702	0.0828408	1	0.0618565	1
Rv0946c	0.0816844	0.986041	0	0
Rv3068c	0	0	0	0
Rv3010c	0.0828408	1	0.0618565	1
Rv2029c	0.0828408	1	0.0618565	1
Rv1099c	0.0828408	1	0	0
Rv1438	0.0826793	0.99805	0.060754	0.982176
Rv1436	0.0824377	0.995134	0.0566161	0.915281
Rv1437	0.0824377	0.995134	0.0566161	0.915281
Rv3214	0.0828408	1	0.0618565	1
Rv0489	0.0828408	1	0.0618565	1
Rv1023	0.0808831	0.976368	0.0604088	0.976596
Rv1617	0.0828408	1	0.0618565	1
Rv2241	0.0798965	0.964458	0.0593823	0.960001
Rv2215	0.0798965	0.964458	0.0593823	0.960001
Rv0462	0.076811	0.927212	0.0573524	0.927185
Rv1131	0	0	0	0
Rv0896	0.0828408	1	0.0618565	1
Rv0889c	0.0828408	1	0.0618565	1
Rv1475c	0	0	0	0
Rv0066c	0.0828408	1	0.0618565	1
Rv3339c	0.0828408	1	0.0618565	1
Rv0555	0	0	0	0
Rv1248c	0.0828408	1	0.0618565	1
Rv2454c	0.0828408	1	0.0618565	1
Rv2455c	0.0828408	1	0.0618565	1
Rv0952	0.0823158	0.993663	0.0617956	0.999015
Rv0951	0.0823158	0.993663	0.0617956	0.999015
Rv1098c	0.0810062	0.977854	0.0611655	0.988829
Rv1240	0.0822816	0.99325	0.0614087	0.992761
Rv3667	0.0828408	1	0.0618565	1
Rv1127c	0.0828408	1	0.0618565	1
Rv0728c	0.0828408	1	0.0618565	1
Rv0694	0.0828408	1	0.0618565	1
Rv1872c	0.0828408	1	0.0618565	1
Rv2332	0.0828334	0.999911	0.0618346	0.999646
Rv1862	0.0828408	1	0.0618565	1
Rv0761c	0.0828408	1	0.0618565	1
Rv1530	0.0828408	1	0.0618565	1
Rv0162c	0.0828408	1	0.0618565	1
Rv3045	0.0828408	1	0.0618565	1
Rv0409	0.0828408	1	0.0618565	1
Rv0408	0.0828408	1	0.0618565	1
Rv2922A	0.0828408	1	0.0618565	1
Rv0974c	0.0828408	1	0.0618565	1
Rv3280	0	0	0	0
Rv1130	0	0	0	0
Rv0467	0.0828408	1	0.0618565	1
Rv1916	0.0828408	1	0.0618565	1
Rv1915	0.0828408	1	0.0618565	1
Rv3140	0.0828408	1	0.0618565	1
Rv1121	0.0828408	1	0.0618565	1
Rv1447c	0.0828408	1	0.0618565	1
Rv1445c	0.0828408	1	0.0618565	1
Rv1122	0.0828408	1	0.0618565	1
Rv1844c	0.0828408	1	0.0618565	1
Rv1408	0.081895	0.988583	0.0608347	0.983481
Rv2465c	0	0	0	0
Rv1449c	0	0	0	0
Rv1448c	0.081916	0.988836	0.0608567	0.983837
Rv0478	0.0828408	1	0.0618565	1
Rv2967c	0.076681	0.925643	0.0573041	0.926404
Rv0211	0.0822439	0.992795	0.0615096	0.994392
Rv1837c	0.0828408	1	0.0618565	1
Rv1257c	0.0828408	1	0.0618565	1
Rv3356c	0	0	0	0
Rv1285	0.0828408	1	0.0618565	1
Rv1286	0.0828408	1	0.0618565	1
Rv2392	0.0828408	1	0.0618565	1
Rv2391	0.0828408	1	0.0618565	1
Rv1164	0.0828408	1	0.0618565	1
Rv1163	0.0828408	1	0.0618565	1
Rv1162	0.0828408	1	0.0618565	1
Rv1736c	0.0828408	1	0.0618565	1
Rv1161	0.0828408	1	0.0618565	1
Rv3146	0.0802069	0.968205	0.0596118	0.963711
Rv3147	0.0802069	0.968205	0.0596118	0.963711
Rv3148	0.0802069	0.968205	0.0596118	0.963711
Rv3149	0.0802069	0.968205	0.0596118	0.963711
Rv3145	0.0802069	0.968205	0.0596118	0.963711
Rv3150	0.0802069	0.968205	0.0596118	0.963711
Rv3151	0.0802069	0.968205	0.0596118	0.963711
Rv3152	0.0802069	0.968205	0.0596118	0.963711
Rv3157	0.0802069	0.968205	0.0596118	0.963711
Rv3158	0.0802069	0.968205	0.0596118	0.963711
Rv3153	0.0802069	0.968205	0.0596118	0.963711
Rv3154	0.0802069	0.968205	0.0596118	0.963711
Rv3155	0.0802069	0.968205	0.0596118	0.963711
Rv3156	0.0802069	0.968205	0.0596118	0.963711
Rv0392c	0.0828408	1	0.0618565	1
Rv1854c	0.0828408	1	0.0618565	1
Rv3303c	0.0828408	1	0.0618565	1
Rv3319	0.0670069	0.808864	0.0505451	0.817135
Rv3316	0.0670069	0.808864	0.0505451	0.817135
Rv3317	0.0670069	0.808864	0.0505451	0.817135
Rv3318	0.0670069	0.808864	0.0505451	0.817135
Rv1554	0.0828408	1	0.0618565	1
Rv1553	0.0828408	1	0.0618565	1
Rv1552	0.0828408	1	0.0618565	1
Rv1555	0.0828408	1	0.0618565	1
Rv3106	0	0	0	0
Rv2196	0.0711144	0.858447	0.052525	0.849143
Rv2200c	0.0711144	0.858447	0.052525	0.849143
Rv3029c	0.0711144	0.858447	0.052525	0.849143
Rv1622c	0	0	0	0
Rv1456c	0.0711144	0.858447	0.052525	0.849143
Rv1451	0.0711144	0.858447	0.052525	0.849143
Rv3043c	0.0711144	0.858447	0.052525	0.849143
Rv2195	0.0711144	0.858447	0.052525	0.849143
Rv3028c	0.0711144	0.858447	0.052525	0.849143
Rv2194	0.0711144	0.858447	0.052525	0.849143
Rv2193	0.0711144	0.858447	0.052525	0.849143
Rv1623c	0	0	0	0
Rv1311	0.0229974	0.27761	0.0122583	0.198173
Rv1310	0.0229974	0.27761	0.0122583	0.198173
Rv1305	0.0229974	0.27761	0.0122583	0.198173
Rv1304	0.0229974	0.27761	0.0122583	0.198173
Rv1309	0.0229974	0.27761	0.0122583	0.198173
Rv1308	0.0229974	0.27761	0.0122583	0.198173
Rv1307	0.0229974	0.27761	0.0122583	0.198173
Rv1306	0.0229974	0.27761	0.0122583	0.198173
Rv1811	0: UNDEFINED	#VALUE!	0: UNDEFINED	#VALUE!
Rv3628	0	0	0	0
Rv2984	0.0828408	1	0.0618565	1
Rv0886	0.0828408	1	0.0618565	1
Rv1908c	0	0	0	0
Rv3432c	0.0828408	1	0.0618565	1
Rv2589	0.0828408	1	0.0618565	1
Rv0234c	0.0828408	1	0.0618565	1
Rv1731	0.0828408	1	0.0618565	1
Rv1188	0.0828408	1	0.0618565	1
Rv1187	0.0828408	1	0.0618565	1
Rv1223	0.0828408	1	0.0618565	1
Rv1001	0.0828408	1	0.0618565	1
Rv2321c	0.0828408	1	0.0618565	1
Rv2322c	0.0828408	1	0.0618565	1
Rv1656	0	0	0	0
Rv2531c	0	0	0	0
Rv2601	0	0	0	0
Rv1851	0.0828408	1	0.0618565	1
Rv1850	0.0828408	1	0.0618565	1
Rv1853	0.0828408	1	0.0618565	1
Rv1852	0.0828408	1	0.0618565	1
Rv1848	0.0828408	1	0.0618565	1
Rv1849	0.0828408	1	0.0618565	1
Rv2210c	0	0	0	0
Rv2497c	0.0828408	1	0.0618565	1
Rv2496c	0.0828408	1	0.0618565	1
Rv2495c	0.0828408	1	0.0618565	1
Rv1472	0.0828408	1	0.0618565	1
Rv1070c	0.0828408	1	0.0618565	1
Rv2486	0.0828408	1	0.0618565	1
Rv0905	0.0828408	1	0.0618565	1
Rv3774	0.0828408	1	0.0618565	1
Rv1144	0.0828408	1	0.0618565	1
Rv1074c	0.0828408	1	0.0618565	1
Rv2247	0.0828408	1	0.0618565	1
Rv0904c	0.0828408	1	0.0618565	1
Rv2502c	0.0828408	1	0.0618565	1
Rv3799c	0	0	0	0
Rv1493	0.0828408	1	0.0618565	1
Rv1492	0.0828408	1	0.0618565	1
Rv2504c	0.0828408	1	0.0618565	1
Rv2503c	0.0828408	1	0.0618565	1
Rv0751c	0.0828408	1	0.0618565	1
Rv0753c	0.0828408	1	0.0618565	1
Rv3601c	0	0	0	0
Rv1538c	0.0828408	1	0.0618565	1
Rv2259	0.0828408	1	0.0618565	1
Rv1079	0	0	0	0
Rv2211c	0.0827311	0.998676	0.0615918	0.995721
Rv0070c	0.0828408	1	0.0618565	1
Rv1093	0.0828408	1	0.0618565	1
Rv1832	0.0827311	0.998676	0.0615918	0.995721
Rv0069c	0.0828408	1	0.0618565	1
Rv1464	0	0	0	0
Rv3565	0.0828408	1	0.0618565	1
Rv0337c	0.0828408	1	0.0618565	1
MT1364	0.0828408	1	0.0618565	1
Rv2220	0	0	0	0
Rv2860c	0.0828408	1	0.0618565	1
Rv1878	0.0828408	1	0.0618565	1
Rv3858c	0.0828408	1	0.0618565	1
Rv3859c	0.0828408	1	0.0618565	1
Rv2476c	0.0828408	1	0.0618565	1
Rv2439c	0.0828408	1	0.0618565	1
Rv2427c	0.0828408	1	0.0618565	1
Rv0500	0	0	0	0
Rv2747	0.0828408	1	0.0618565	1
Rv1654	0	0	0	0
Rv1652	0	0	0	0
Rv1655	0	0	0	0
Rv1653	0	0	0	0
Rv1384	0	0	0	0
Rv1383	0	0	0	0
Rv1658	0	0	0	0
Rv1659	0	0	0	0
Rv3002c	0	0	0	0
Rv3003c	0	0	0	0
Rv3001c	0	0	0	0
Rv0189c	0	0	0	0
Rv1559	0.0828408	1	0.0618565	1
Rv3470c	0.0828408	1	0.0618565	1
Rv1820	0.0828408	1	0.0618565	1
Rv3509c	0.0828408	1	0.0618565	1
Rv3710	0	0	0	0
Rv2988c	0	0	0	0
Rv2987c	0	0	0	0
Rv2995c	0	0	0	0
Rv2201	0	0	0	0
Rv3709c	0	0	0	0
Rv3708c	0	0	0	0
Rv1294	0	0	0	0
Rv1296	0	0	0	0
Rv1295	0	0	0	0
Rv2753c	0.0828408	1	0.0618565	1
Rv2773c	0.0828408	1	0.0618565	1
Rv1201c	0.0828408	1	0.0618565	1
Rv0858c	0.0828408	1	0.0618565	1
Rv1202	0.0828408	1	0.0618565	1
Rv2726c	0	0	0	0
Rv1293	0	0	0	0
MT3443	0.0828408	1	0.0618565	1
Rv2458	0.0828408	1	0.0618565	1
Rv2124c	0.0828408	1	0.0618565	1
Rv1133c	0.0761439	0.919159	0.0569061	0.91997
Rv2780	0	0	0	0
Rv2996c	0.0828408	1	0.0618565	1
Rv0884c	0.0828408	1	0.0618565	1
Rv3042c	0.0828408	1	0.0618565	1
Rv2335	0.0828408	1	0.0618565	1
Rv2334	0.0828408	1	0.0618565	1
Rv1336	0.0828408	1	0.0618565	1
Rv3341	0.0828408	1	0.0618565	1
Rv1077	0	0	0	0
Rv1392	0	0	0	0
Rv3248c	0	0	0	0
Rv2121c	0	0	0	0
Rv2122c	0	0	0	0
Rv1606	0	0	0	0
Rv1603	0	0	0	0
Rv1602	0	0	0	0
Rv1601	0	0	0	0
Rv3772	0.0828408	1	0.0618565	1
Rv1600	0.0828408	1	0.0618565	1
Rv1599	0	0	0	0
Rv2178c	0	0	0	0
Rv2538c	0	0	0	0
Rv2537c	0	0	0	0
Rv2552c	0	0	0	0
Rv2539c	0	0	0	0
Rv3227	0	0	0	0
Rv2540c	0	0	0	0
Rv1609	0	0	0	0
Rv2192c	0	0	0	0
Rv1611	0	0	0	0
Rv1613	0	0	0	0
Rv1612	0	0	0	0
Rv0948c	0.0828408	1	0.0618565	1
Rv1885c	0.0828408	1	0.0618565	1
Rv3838c	0	0	0	0
Rv3754	0	0	0	0
Rv1017c	0	0	0	0
Rv1380	0	0	0	0
Rv1381	0	0	0	0
Rv2139	0	0	0	0
Rv0382c	0	0	0	0
Rv1385	0	0	0	0
Rv1712	0	0	0	0
Rv2445c	0	0	0	0
Rv1699	0	0	0	0
Rv3051c	0	0	0	0
Rv3048c	0	0	0	0
Rv0570	0.0828408	1	0.0618565	1
Rv0321	0.0828408	1	0.0618565	1
Rv2697c	0	0	0	0
Rv2754c	0.0828392	0.999981	0.0618553	0.999981
Rv2764c	0.0828408	1	0.0618565	1
Rv3247c	0	0	0	0
Rv3913	0	0	0	0
Rv3309c	0.0828408	1	0.0618565	1
Rv0808	0	0	0	0
Rv0772	0	0	0	0
Rv0956	0	0	0	0
Rv0803	0	0	0	0
Rv0809	0	0	0	0
Rv3276c	0.0828408	1	0.0618565	1
Rv0780	0.0828408	1	0.0618565	1
Rv0777	0.0828408	1	0.0618565	1
Rv0957	0	0	0	0
Rv1625c	0.0828408	1	0.0618565	1
Rv2435c	0.0828408	1	0.0618565	1
Rv1389	0	0	0	0
Rv0535	0	0	0	0
Rv2584c	0.0828408	1	0.0618565	1
Rv3624c	0.0827491	0.998893	0.0617888	0.998906
Rv3307	0	0	0	0
Rv3313c	0.0827491	0.998893	0.0617888	0.998906
Rv2583c	0.0828408	1	0.0618565	1
Rv0357c	0.0828408	1	0.0618565	1
RV0777	0.0828408	1	0.0618565	1
Rv0733	0	0	0	0
Rv2202c	0.0819776	0.98958	0.0612189	0.989692
Rv3410c	0	0	0	0
Rv1843c	0	0	0	0
Rv3411c	0	0	0	0
Rv3396c	0	0	0	0
Rv1595	0	0	0	0
Rv1594	0	0	0	0
Rv1596	0	0	0	0
Rv2043c	0.0828408	1	0.0618565	1
Rv0573c	0.0828408	1	0.0618565	1
Rv2421c	0	0	0	0
Rv2438c	0	0	0	0
Rv0410c	0.0828408	1	0.0618565	1
Rv0156	0.0828408	1	0.0618565	1
Rv0157	0.0828408	1	0.0618565	1
Rv0155	0.0828408	1	0.0618565	1
Rv1695	0	0	0	0
Rv2713	0.0828408	1	0.0618565	1
Rv3199c	0.0828408	1	0.0618565	1
Rv1415	0.0828408	1	0.0618565	1
Rv1940	0	0	0	0
Rv2671	0.0828408	1	0.0618565	1
Rv1409	0.0828408	1	0.0618565	1
Rv1416	0	0	0	0
Rv1412	0	0	0	0
Rv2786c	0	0	0	0
Rv0306	0.0828408	1	0.0618565	1
Rv2207	0.0828408	1	0.0618565	1
Rv2225	0	0	0	0
Rv2573	0	0	0	0
Rv3602c	0	0	0	0
Rv1092c	0	0	0	0
Rv1391	0	0	0	0
Rv2965c	0	0	0	0
Rv1631	0	0	0	0
Rv2794c	0.0828408	1	0.0618565	1
Rv2523c	0	0	0	0
Rv3609c	0.0828408	1	0.0618565	1
Rv0758	0.0828408	1	0.0618565	1
Rv0757	0.0828408	1	0.0618565	1
Rv3607c	0.0828408	1	0.0618565	1
Rv3606c	0.0828408	1	0.0618565	1
Rv0013	0.0828408	1	0.0618565	1
Rv0812	0.0828408	1	0.0618565	1
Rv1207	0.0828408	1	0.0618565	1
Rv3608c	0.0828408	1	0.0618565	1
Rv2447c	0.0828408	1	0.0618565	1
Rv2763c	0.0828408	1	0.0618565	1
Rv3025c	0.0828408	1	0.0618565	1
Rv3215	0.0828408	1	0.0618565	1
Rv2386c	0.0828408	1	0.0618565	1
Rv0542c	0	0	0	0
Rv0553	0	0	0	0
Rv0548c	0	0	0	0
Rv0534c	0	0	0	0
Rv0032	0.0828408	1	0.0618565	1
Rv1569	0.0828408	1	0.0618565	1
Rv1568	0.0828408	1	0.0618565	1
Rv1570	0.0828408	1	0.0618565	1
Rv1589	0.0828408	1	0.0618565	1
Rv1284	0.0828408	1	0.0618565	1
Rv3588c	0.0828408	1	0.0618565	1
Rv3279c	0	0	0	0
Rv0973c	0.0828408	1	0.0618565	1
Rv3285	0	0	0	0
Rv2501c	0.0828408	1	0.0618565	1
Rv2217	0	0	0	0
Rv2218	0	0	0	0
Rv2992c	0	0	0	0
Rv0509	0	0	0	0
Rv0524	0	0	0	0
Rv0512	0	0	0	0
Rv0510	0	0	0	0
Rv0511	0	0	0	0
Rv2678c	0	0	0	0
Rv2388C	0.0828408	1	0.0618565	1
Rv1300	0.0828408	1	0.0618565	1
Rv2677	0.0828408	1	0.0618565	1
Rv1485	0	0	0	0
Rv2847c	0.0828408	1	0.0618565	1
Rv2066	0.0828408	1	0.0618565	1
Rv2064	0.0828408	1	0.0618565	1
Rv2071c	0.0828408	1	0.0618565	1
Rv2070c	0.0828408	1	0.0618565	1
Rv2072c	0.0828408	1	0.0618565	1
Rv2065	0.0828408	1	0.0618565	1
Rv2848c	0.0828408	1	0.0618565	1
Rv2849c	0.0828408	1	0.0618565	1
Rv0255c	0.0828408	1	0.0618565	1
Rv2231c	0.0828408	1	0.0618565	1
Rv0254c	0.0828408	1	0.0618565	1
Rv2208	0.0828408	1	0.0618565	1
Rv3206c	0.0828408	1	0.0618565	1
Rv3116	0.0828408	1	0.0618565	1
Rv3111	0.0828408	1	0.0618565	1
Rv3109	0.0828408	1	0.0618565	1
Rv3119	0.0828408	1	0.0618565	1
Rv0866	0.0828408	1	0.0618565	1
Rv3322c	0.0828408	1	0.0618565	1
Rv2453c	0.0828408	1	0.0618565	1
Rv0423c	0	0	0	0
Rv0422c	0	0	0	0
Rv0417	0	0	0	0
Rv0414c	0	0	0	0
Rv1173	0.0828408	1	0.0618565	1
Rv3261	0.0828408	1	0.0618565	1
Rv3262	0.0828408	1	0.0618565	1
Rv3263	0.0828408	1	0.0618565	1
Rv0486	0.0828408	1	0.0618565	1
Rv1170	0.0828408	1	0.0618565	1
Rv2130	0.0828408	1	0.0618565	1
Rv0819	0.0828408	1	0.0618565	1
Rv1082	0.0828408	1	0.0618565	1
Rv2384	0	0	0	0
Rv2383c	0	0	0	0
Rv2380c	0	0	0	0
Rv2381c	0	0	0	0
Rv2382c	0	0	0	0
Rv2243	0.0828408	1	0.0618565	1
Rv2244	0.0828408	1	0.0618565	1
Rv0649	0.0828408	1	0.0618565	1
Rv2524c	0	0	0	0
Rv2505c	0.0828408	1	0.0618565	1
Rv1345	0.0828408	1	0.0618565	1
Rv3561	0.0828408	1	0.0618565	1
Rv0099	0.0828408	1	0.0618565	1
Rv3089	0.0828408	1	0.0618565	1
Rv0214	0.0828408	1	0.0618565	1
Rv0852	0.0828408	1	0.0618565	1
Rv3801c	0	0	0	0
Rv1193	0.0828408	1	0.0618565	1
Rv2948c	0.0828408	1	0.0618565	1
Rv1427c	0.0828408	1	0.0618565	1
Rv1750c	0.0828408	1	0.0618565	1
Rv3515c	0.0828408	1	0.0618565	1
Rv0270	0.0828408	1	0.0618565	1
Rv0035	0.0828408	1	0.0618565	1
Rv1521	0.0828408	1	0.0618565	1
Rv1206	0.0828408	1	0.0618565	1
Rv3506	0.0828408	1	0.0618565	1
Rv0275c	0.0828408	1	0.0618565	1
Rv3826	0.0828408	1	0.0618565	1
Rv2930	0.0828408	1	0.0618565	1
Rv1529	0.0828408	1	0.0618565	1
Rv1925	0.0828408	1	0.0618565	1
Rv0119	0.0828408	1	0.0618565	1
Rv2187	0.0828408	1	0.0618565	1
Rv1058	0.0828408	1	0.0618565	1
Rv0551c	0.0828408	1	0.0618565	1
Rv1185c	0.0828408	1	0.0618565	1
Rv0166	0.0828408	1	0.0618565	1
Rv2941	0.0828408	1	0.0618565	1
Rv2950c	0.0828408	1	0.0618565	1
Rv0404	0.0828408	1	0.0618565	1
Rv3513c	0.0828408	1	0.0618565	1
Rv2590	0.0828408	1	0.0618565	1
Rv2679	0.0828408	1	0.0618565	1
Rv1346	0.0828408	1	0.0618565	1
Rv2831	0.0828408	1	0.0618565	1
Rv1933c	0.0828408	1	0.0618565	1
Rv3373	0.0828408	1	0.0618565	1
Rv3374	0.0828408	1	0.0618565	1
Rv0400c	0.0828408	1	0.0618565	1
Rv3139	0.0828408	1	0.0618565	1
Rv3141	0.0828408	1	0.0618565	1
Rv3543c	0.0828408	1	0.0618565	1
Rv1467c	0.0828408	1	0.0618565	1
Rv3761c	0.0828408	1	0.0618565	1
Rv0673	0.0828408	1	0.0618565	1
Rv1142c	0.0828408	1	0.0618565	1
Rv0672	0.0828408	1	0.0618565	1
Rv0675	0.0828408	1	0.0618565	1
Rv3546	0.0828408	1	0.0618565	1
Rv0215c	0.0828408	1	0.0618565	1
Rv3039c	0.0828408	1	0.0618565	1
Rv3556c	0.0828408	1	0.0618565	1
Rv3544c	0.0828408	1	0.0618565	1
Rv3560c	0.0828408	1	0.0618565	1
Rv0975c	0.0828408	1	0.0618565	1
Rv3797	0.0828408	1	0.0618565	1
Rv3550	0.0828408	1	0.0618565	1
Rv1141c	0.0828408	1	0.0618565	1
Rv0244c	0.0828408	1	0.0618565	1
Rv0271c	0.0828408	1	0.0618565	1
Rv3564	0.0828408	1	0.0618565	1
Rv0972c	0.0828408	1	0.0618565	1
Rv3274c	0.0828408	1	0.0618565	1
Rv3573c	0.0828408	1	0.0618565	1
Rv1071c	0.0828408	1	0.0618565	1
Rv3562	0.0828408	1	0.0618565	1
Rv3563	0.0828408	1	0.0618565	1
Rv0859	0.0828408	1	0.0618565	1
Rv0131c	0.0828408	1	0.0618565	1
Rv0222	0.0828408	1	0.0618565	1
Rv3061c	0.0828408	1	0.0618565	1
Rv1679	0.0828408	1	0.0618565	1
Rv2500c	0.0828408	1	0.0618565	1
Rv0468	0.0828408	1	0.0618565	1
Rv0456c	0.0828408	1	0.0618565	1
Rv1715	0.0828408	1	0.0618565	1
Rv1912c	0.0828408	1	0.0618565	1
Rv0752c	0.0828408	1	0.0618565	1
Rv1323	0.0828408	1	0.0618565	1
Rv0231	0.0828408	1	0.0618565	1
Rv0154c	0.0828408	1	0.0618565	1
Rv0873	0.0828408	1	0.0618565	1
Rv2789c	0.0828408	1	0.0618565	1
Rv3504	0.0828408	1	0.0618565	1
Rv3505	0.0828408	1	0.0618565	1
Rv1935c	0.0828408	1	0.0618565	1
Rv0632c	0.0828408	1	0.0618565	1
Rv0971c	0.0828408	1	0.0618565	1
Rv0243	0.0828408	1	0.0618565	1
Rv2724c	0.0828408	1	0.0618565	1
Rv3516	0.0828408	1	0.0618565	1
Rv1934c	0.0828408	1	0.0618565	1
Rv3097c	0	0	0	0
Rv0183	0.0828408	1	0.0618565	1
Rv2854	0.0828408	1	0.0618565	1
Rv1551	0.0828408	1	0.0618565	1
Rv2482c	0	0	0	0
Rv2483c	0.0828408	1	0.0618565	1
Rv2182c	0.0828408	1	0.0618565	1
Rv2881c	0	0	0	0
Rv0436c	0	0	0	0
Rv0217c	0.0828408	1	0.0618565	1
Rv3203	0.0828408	1	0.0618565	1
Rv1105	0.0828408	1	0.0618565	1
Rv1104	0.0828408	1	0.0618565	1
Rv2350c	0.0828408	1	0.0618565	1
Rv1399c	0.0828408	1	0.0618565	1
Rv1400c	0.0828408	1	0.0618565	1
Rv1755c	0.0828408	1	0.0618565	1
Rv1076	0.0828408	1	0.0618565	1
Rv3775	0.0828408	1	0.0618565	1
Rv2284	0.0828408	1	0.0618565	1
Rv0220	0.0828408	1	0.0618565	1
Rv0646c	0.0828408	1	0.0618565	1
Rv1900c	0.0828408	1	0.0618565	1
Rv2349c	0.0828408	1	0.0618565	1
Rv1923	0.0828408	1	0.0618565	1
Rv2045c	0.0828408	1	0.0618565	1
Rv2485c	0.0828408	1	0.0618565	1
Rv1426c	0.0828408	1	0.0618565	1
Rv3487c	0.0828408	1	0.0618565	1
Rv2463	0.0828408	1	0.0618565	1
Rv2385	0.0828408	1	0.0618565	1
Rv3176c	0.0828408	1	0.0618565	1
Rv1497	0.0828408	1	0.0618565	1
Rv2970c	0.0828408	1	0.0618565	1
Rv2351c	0.0828408	1	0.0618565	1
Rv3084	0.0828408	1	0.0618565	1
Rv0564	0.0828408	1	0.0618565	1
Rv2982c	0.0828408	1	0.0618565	1
Rv2746c	0.0828408	1	0.0618565	1
Rv2610c	0	0	0	0
Rv2611c	0	0	0	0
Rv0557	0	0	0	0
Rv1500	0	0	0	0
Rv2048c	0.0828408	1	0.0618565	1
Rv0533c	0	0	0	0
Rv1483	0.0828408	1	0.0618565	1
Rv1350	0.0828408	1	0.0618565	1
Rv2002	0.0828408	1	0.0618565	1
Rv0242c	0.0828408	1	0.0618565	1
Rv2766c	0.0828408	1	0.0618565	1
Rv0637	0.0828408	1	0.0618565	1
Rv0635	0.0828408	1	0.0618565	1
Rv0636	0	0	0	0
Rv1142	0.0828408	1	0.0618565	1
Rv0130	0.0828408	1	0.0618565	1
Rv1484	0.0828408	1	0.0618565	1
Rv0098	0.0828408	1	0.0618565	1
Rv2246	0.0828408	1	0.0618565	1
Rv2245	0.0828408	1	0.0618565	1
Rv0643c	0	0	0	0
Rv0503c	0	0	0	0
Rv0642c	0	0	0	0
Rv0644c	0	0	0	0
Rv0645c	0	0	0	0
Rv3800c	0	0	0	0
Rv3802c	0	0	0	0
Rv0774c	0.0828408	1	0.0618565	1
Rv1288	0.0828408	1	0.0618565	1
Rv0519c	0.0828408	1	0.0618565	1
Rv2006	0.0828408	1	0.0618565	1
Rv2940c	0	0	0	0
RV3825c	0.0828408	1	0.0618565	1
Rv2949c	0.0828408	1	0.0618565	1
Rv2933	0.0828408	1	0.0618565	1
Rv2932	0.0828408	1	0.0618565	1
Rv2931	0.0828408	1	0.0618565	1
Rv2935	0.0828408	1	0.0618565	1
Rv2934	0.0828408	1	0.0618565	1
Rv2951c	0.0828408	1	0.0618565	1
Rv2952	0.0828408	1	0.0618565	1
Rv2939	0.0828408	1	0.0618565	1
Rv2946c	0.0828408	1	0.0618565	1
Rv2947c	0.0828408	1	0.0618565	1
Rv1661	0.0828408	1	0.0618565	1
Rv2942	0.0828408	1	0.0618565	1
Rv2937	0.0828408	1	0.0618565	1
RV2936	0.0828408	1	0.0618565	1
Rv2938	0.0828408	1	0.0618565	1
Rv2962c	0.0828408	1	0.0618565	1
Rv2958c	0.0828408	1	0.0618565	1
Rv2959c	0.0828408	1	0.0618565	1
Rv2957	0.0828408	1	0.0618565	1
Rv1373	0.0828408	1	0.0618565	1
Rv2267c	0.0828408	1	0.0618565	1
Rv3529c	0.0828408	1	0.0618565	1
Rv3823c	0.0828408	1	0.0618565	1
Rv1181	0.0828408	1	0.0618565	1
Rv1180	0.0828408	1	0.0618565	1
Rv1182	0.0828408	1	0.0618565	1
Rv1183	0.0828408	1	0.0618565	1
Rv2682c	0.0828408	1	0.0618565	1
Rv3379c	0.0828408	1	0.0618565	1
Rv2870c	0	0	0	0
Rv3582c	0	0	0	0
Rv1011	0	0	0	0
Rv3581c	0	0	0	0
Rv2868c	0	0	0	0
Rv1110	0.0828408	1	0.0618565	1
Rv3382c	0.0828408	1	0.0618565	1
Rv1745c	0	0	0	0
Rv3398c	0	0	0	0
Rv3383c	0.0828408	1	0.0618565	1
Rv2173	0.0828408	1	0.0618565	1
Rv1086	0	0	0	0
Rv0562	0	0	0	0
Rv2361c	0.0828408	1	0.0618565	1
Rv3806c	0	0	0	0
Rv3791	0	0	0	0
Rv3790	0	0	0	0
Rv3423c	0	0	0	0
Rv2981c	0	0	0	0
Rv3265c	0.0828408	1	0.0618565	1
Rv1525	0.0828408	1	0.0618565	1
Rv3808c	0	0	0	0
Rv3792	0	0	0	0
Rv3795	0	0	0	0
Rv3794	0	0	0	0
Rv0334	0	0	0	0
Rv3784	0.0828408	1	0.0618565	1
Rv3468	0.0828408	1	0.0618565	1
Rv3464	0.0828408	1	0.0618565	1
Rv3465	0	0	0	0
Rv3260c	0	0	0	0
Rv3809c	0	0	0	0
Rv3436c	0.0828408	1	0.0618565	1
Rv1338	0	0	0	0
Rv1018c	0	0	0	0
Rv1315	0	0	0	0
Rv0482	0	0	0	0
Rv3818	0	0	0	0
Rv2152c	0	0	0	0
Rv2155c	0	0	0	0
Rv2158c	0	0	0	0
Rv2157c	0	0	0	0
Rv2156c	0	0	0	0
Rv2153c	0	0	0	0
Rv0437c	0	0	0	0
Rv3087	0.0828408	1	0.0618565	1
Rv3088	0.0828408	1	0.0618565	1
Rv1760	0.0828408	1	0.0618565	1
Rv3480c	0.0828408	1	0.0618565	1
Rv1425	0.0828408	1	0.0618565	1
Rv0895	0.0828408	1	0.0618565	1
Rv3734c	0.0828408	1	0.0618565	1
Rv3371	0.0828408	1	0.0618565	1
Rv3740c	0.0828408	1	0.0618565	1
Rv3233c	0.0828408	1	0.0618565	1
Rv2285	0.0828408	1	0.0618565	1
Rv3130c	0.0828408	1	0.0618565	1
Rv0221	0.0828408	1	0.0618565	1
Rv2484c	0.0828408	1	0.0618565	1
Rv3234c	0.0828408	1	0.0618565	1
Rv0129c	0	0	0	0
Rv3804c	0	0	0	0
Rv1886c	0	0	0	0
Rv0194	0.0828408	1	0.0618565	1
Rv1273c	0.0828408	1	0.0618565	1
Rv1272c	0.0828408	1	0.0618565	1
Rv1349	0.0828408	1	0.0618565	1
Rv1348	0.0828408	1	0.0618565	1
Rv1747	0.0828408	1	0.0618565	1
Rv1819c	0.0828408	1	0.0618565	1
Rv1686c	0.0828408	1	0.0618565	1
Rv1687c	0.0828408	1	0.0618565	1
Rv3793	0.0828408	1	0.0618565	1
Rv1737c	0.0828408	1	0.0618565	1
Rv2127	0.0828408	1	0.0618565	1
Rv2834c	0.0828408	1	0.0618565	1
Rv2565	0.0828408	1	0.0618565	1
Rv0411c	0.0828408	1	0.0618565	1
Rv2835c	0.0828408	1	0.0618565	1
Rv2833c	0.0828408	1	0.0618565	1
Rv2832c	0.0828408	1	0.0618565	1
Rv0930	0.0828408	1	0.0618565	1
Rv0934	0.0828408	1	0.0618565	1
Rv0935	0.0828408	1	0.0618565	1
Rv0932c	0.0828408	1	0.0618565	1
Rv0933	0.0828408	1	0.0618565	1
Rv0928	0.0828408	1	0.0618565	1
Rv0936	0.0828408	1	0.0618565	1
Rv0929	0.0828408	1	0.0618565	1
Rv2398c	0.0828408	1	0.0618565	1
Rv2399c	0.0828408	1	0.0618565	1
Rv2400c	0.0828408	1	0.0618565	1
Rv2397c	0.0828408	1	0.0618565	1
Rv2281	0.0828408	1	0.0618565	1
Rv3495c	0.0828408	1	0.0618565	1
Rv3494c	0.0828408	1	0.0618565	1
Rv3497c	0.0828408	1	0.0618565	1
Rv3496c	0.0828408	1	0.0618565	1
Rv0655	0.0828408	1	0.0618565	1
Rv3499c	0.0828408	1	0.0618565	1
Rv3498c	0.0828408	1	0.0618565	1
Rv3501c	0.0828408	1	0.0618565	1
Rv3500c	0.0828408	1	0.0618565	1
Rv1106c	0.0828408	1	0.0618565	1
Rv3537	0.0828408	1	0.0618565	1
Rv3571	0.0828408	1	0.0618565	1
Rv3526	0.0828408	1	0.0618565	1
Rv3570c	0.0828408	1	0.0618565	1
Rv3567c	0.0828408	1	0.0618565	1
Rv3568c	0.0828408	1	0.0618565	1
Rv3569c	0.0828408	1	0.0618565	1
Rv3522	0.0828408	1	0.0618565	1
Rv3523	0.0828408	1	0.0618565	1
Rv3538	0.0828408	1	0.0618565	1
Rv3502c	0.0828408	1	0.0618565	1
Rv3536c	0.0828408	1	0.0618565	1
Rv3535c	0.0828408	1	0.0618565	1
Rv3534c	0.0828408	1	0.0618565	1
;		0		0
#time spent: 75
